# Supplementary material for: Eco-friendly synthesis of diverse and valuable 2-pyridones by catalyst- and solvent-free thermal multicomponent domino reaction
Source: Royal Society of Chemistry journal article supplement (doi:10.1039/c5gc01526j), 2015-01-01

## SUPPORTING INFORMATION

### **Eco-friendly synthesis of diverse and valuable 2-pyridones by catalyst- and solvent-free thermal multicomponent domino reaction**

Tej Narayan Poudel,<sup>a</sup> Yong Rok Lee,<sup>a\*</sup> and Sung Hong Kim<sup>b</sup>

<sup>a</sup> School of Chemical Engineering, Yeungnam University, Gyeongsan 712-749, Republic of Korea  
Email: [yrlee@yu.ac.kr](mailto:yrlee@yu.ac.kr), Phone: +82-53-810-2529; Fax: +82-53-810-4631

<sup>b</sup> Analysis Research Division, Daegu Center, Korea Basic Science Institute, Daegu 702-701, Republic of Korea

## TABLE OF CONTENTS

|                                                                                              |              |
|----------------------------------------------------------------------------------------------|--------------|
| <b>Experimental</b>                                                                          | <b>2</b>     |
| <b>General Experimental Procedures for compounds 4-6</b>                                     | <b>2</b>     |
| <b>Spectroscopic data of compounds 4-6</b>                                                   | <b>2-12</b>  |
| <b><sup>1</sup>H NMR, <sup>13</sup>C NMR and <sup>19</sup>F NMR Spectra of compounds 4-6</b> | <b>13-72</b> |

## Experimental

All experiments were carried out under open air without inert gases protection. 3-formyl chromones (**1a-1i**), anilines and amines (**3a-3k**) and Ketoesters (**2a-2g**) were purchased from Sigma- Aldrich. Merck precoated silica gel plates (Art. 5554) with a fluorescent indicator were used for analytical TLC. Flash column chromatography was performed using silica gel 9385 (Merck). Melting points were determined with micro-cover glasses on a Fisher-Johns apparatus and are uncorrected.  $^1\text{H}$  NMR spectra were recorded on a Varian-VNS or DPX (300 MHz) spectrometer in  $\text{CDCl}_3$  or  $\text{DMSO}-d_6$  using 7.24 or 2.5 ppm as the solvent chemical shift respectively.  $^{13}\text{C}$  NMR spectra were recorded on a Varian-VNS or DPX (75 MHz) spectrometer in  $\text{CDCl}_3$  or  $\text{DMSO}-d_6$  using 77.0 or 39.5 ppm as the solvent chemical shift respectively. IR spectra were recorded on a JASCO FTIR 5300 spectrophotometer. High resolution mass (HRMS) were obtained with a JEOL JMS-700 spectrometer at the Korea Basic Science Institute. Optical rotation was measured using Atago Automatic Polarimeter AP-100.

### General procedure for the synthesis of benzoyl substituted 2-pyridone derivatives (4-6)

To a solution of ketoesters **2a-2g** (1.0 mmol) and anilines **3a-3k** (1.0 mmol), 1.0 mmol of 3-formyl chromone (**1a-1i**) was added. Each reaction mixture was heated at 100 °C for 8-12 hours. Then the reaction mixture was subjected for crystallization using ethanol or mixture of hexane and ethylacetate (9:1) as solvent. However, some liquid compounds **4l**, **4m**, **5d**, **5k** and **6g** were purified by column chromatography using the mixture of hexane and ethyl acetate (5:1) as eluting solvent. Characterization data for all compounds **4-6** are as follows:

**Methyl 5-(2-hydroxybenzoyl)-2-oxo-1-phenyl-1,2-dihydropyridine-3-carboxylate (4a).** The

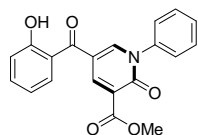

title compound was prepared according to the general procedure. The product was obtained as a white solid, mp 186-188 °C. Yield: 78%.  $^1\text{H}$  NMR (300 MHz,  $\text{CDCl}_3$ )  $\delta$  11.31 (1H, s), 8.58 (1H, d,  $J = 2.1$  Hz), 8.18 (1H, d,  $J = 2.4$  Hz), 7.57-7.45 (5H, m), 7.38 (2H, d,  $J = 7.8$  Hz), 7.04 (1H, d,  $J = 7.8$  Hz), 6.92 (1H, t,  $J = 7.8$  Hz), 3.88 (3H, s);  $^{13}\text{C}$  NMR (75 MHz,  $\text{CDCl}_3$ )  $\delta$  194.2, 164.6, 162.4, 158.3, 146.9, 144.4, 139.6, 136.5, 131.3, 129.5, 129.5, 126.3, 120.6, 119.2, 118.8, 118.5, 116.0, 52.6; IR (KBr) 3354, 3071, 1698, 1598, 1524, 1249, 787, 509  $\text{cm}^{-1}$ ; HRMS  $m/z$  ( $\text{M}^+$ ) calcd for  $\text{C}_{20}\text{H}_{15}\text{NO}_5$ : 349.0950. Found: 349.0948.

**Ethyl 5-(2-hydroxybenzoyl)-2-oxo-1-phenyl-1,2-dihydropyridine-3-carboxylate (4b).** The

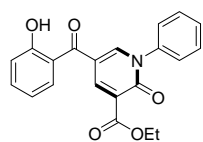

title compound was prepared according to the general procedure. The product was obtained as a yellow solid, mp 96-98 °C. Yield: 73%;  $^1\text{H}$  NMR (300 MHz,  $\text{CDCl}_3$ )  $\delta$  11.24 (1H, s), 8.50 (1H, d,  $J = 2.1$  Hz), 8.12 (1H, d,  $J = 2.4$  Hz), 7.52-7.31 (7H, m), 6.97 (1H, d,  $J = 7.8$  Hz), 6.86 (1H, t,  $J = 7.5$  Hz), 4.29 (2H, q,  $J = 6.9$  Hz), 1.29 (3H, t,  $J = 6.9$  Hz);  $^{13}\text{C}$  NMR (150 MHz,  $\text{CDCl}_3$ )  $\delta$  194.3, 164.1, 162.4, 158.4, 146.7, 144.1, 139.5, 136.5, 131.3, 129.5, 129.4, 126.3, 121.0, 119.2, 118.8, 118.4, 115.9,

61.6, 14.1; IR (KBr) 3342, 3072, 1680, 1586, 1495, 1289, 792, 520  $\text{cm}^{-1}$ ; HRMS  $m/z$  ( $\text{M}^+$ ) calcd for  $\text{C}_{21}\text{H}_{17}\text{NO}_5$ : 363.1107. Found: 363.1104.

**Methyl 5-(2-hydroxy-5-methylbenzoyl)-2-oxo-1-phenyl-1,2-dihydropyridine-3-carboxylate**

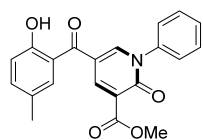

**(4c).** The title compound was prepared according to the general procedure. The product was obtained as a white solid, mp 167-169  $^{\circ}\text{C}$ . Yield: 77%;  $^1\text{H}$  NMR (300 MHz,  $\text{CDCl}_3$ )  $\delta$  11.07 (1H, s), 8.57 (1H, d,  $J = 2.1$  Hz), 8.17 (1H, d,  $J = 2.4$  Hz), 7.49-7.28 (7H, m), 7.93 (1H, d,  $J = 7.8$  Hz), 3.87 (3H, s), 2.27 (3H, s);

$^{13}\text{C}$  NMR (75 MHz,  $\text{CDCl}_3$ )  $\delta$  194.1, 164.6, 160.2, 158.3, 146.8, 144.5, 139.6, 137.5, 131.1, 129.5, 129.4, 128.3, 126.3, 120.4, 118.5, 118.2, 116.1, 52.5, 20.5; IR (KBr) 3342, 3052, 1686, 1570, 1514, 1268, 781, 507  $\text{cm}^{-1}$ ; HRMS  $m/z$  ( $\text{M}^+$ ) calcd for  $\text{C}_{21}\text{H}_{17}\text{NO}_5$ : 363.1107. Found: 363.1106.

**Ethyl 5-(5-ethyl-2-hydroxybenzoyl)-2-oxo-1-phenyl-1,2-dihydropyridine-3-carboxylate**

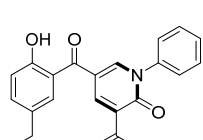

**(4d).** The title compound was prepared according to the general procedure. The product was obtained as a white solid, mp 157-159  $^{\circ}\text{C}$ . Yield: 75%;  $^1\text{H}$  NMR (300 MHz,  $\text{CDCl}_3$ )  $\delta$  11.10 (1H, s), 8.57 (1H, d,  $J = 2.1$  Hz), 8.18 (1H, d,  $J = 2.4$  Hz), 7.51-7.44 (3H, m), 7.38-7.32 (4H, m), 6.95 (1H, d,  $J = 7.8$  Hz),

4.35 (2H, q,  $J = 7.2$  Hz), 2.58 (2H, q,  $J = 7.5$  Hz), 1.34 (3H, t,  $J = 7.5$  Hz), 1.19 (3H, t,  $J = 7.2$  Hz);  $^{13}\text{C}$  NMR (75 MHz,  $\text{CDCl}_3$ )  $\delta$  194.2, 164.0, 160.5, 158.4, 146.8, 144.2, 139.7, 136.5, 134.8, 129.9, 129.5, 129.4, 126.3, 120.8, 118.6, 118.2, 116.0, 61.6, 27.8, 15.6, 14.2; IR (KBr) 3337, 3075, 1686, 1587, 1504, 1281, 787, 512  $\text{cm}^{-1}$ ; HRMS  $m/z$  ( $\text{M}^+$ ) calcd for  $\text{C}_{23}\text{H}_{21}\text{NO}_5$ : 391.1420. Found: 391.1419.

**Ethyl 5-(2-hydroxy-5-isopropylbenzoyl)-2-oxo-1-phenyl-1,2-dihydropyridine-3-carboxylate**

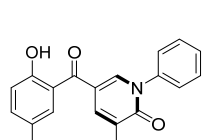

**(4e).** The title compound was prepared according to the general procedure. The product was obtained as a yellow solid, mp 118-120  $^{\circ}\text{C}$ . Yield: 73%;  $^1\text{H}$  NMR (300 MHz,  $\text{CDCl}_3$ )  $\delta$  11.12 (1H, s), 8.62 (1H, d,  $J = 2.1$  Hz), 8.23 (1H, d,  $J = 2.4$  Hz), 7.52-7.41 (7H, m), 7.03-6.96 (1H, m), 4.36 (2H, q,  $J = 6.9$  Hz), 2.93-2.86 (1H, m), 1.36 (3H, t,  $J = 6.9$  Hz), 1.25 (6H, d,  $J = 8.7$  Hz);  $^{13}\text{C}$  NMR (150

MHz,  $\text{CDCl}_3$ )  $\delta$  194.2, 163.9, 160.4, 158.4, 147.0, 144.2, 139.6, 139.4, 135.3, 129.5, 129.5, 128.5, 126.3, 120.6, 118.5, 118.1, 115.9, 61.5, 33.0, 23.9, 23.9, 14.2; IR (KBr) 3347, 3071, 1694, 1584, 1514, 1290, 787, 517  $\text{cm}^{-1}$ ; HRMS  $m/z$  ( $\text{M}^+$ ) calcd for  $\text{C}_{24}\text{H}_{23}\text{NO}_5$ : 405.1576. Found: 405.1573.

**Ethyl 5-(2-hydroxy-5-methoxybenzoyl)-2-oxo-1-phenyl-1,2-dihydropyridine-3-carboxylate**

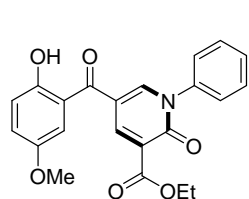

**(4f).** The title compound was prepared according to the general procedure. The product was obtained as a yellow solid, mp 137-139  $^{\circ}\text{C}$ . Yield: 74%;  $^1\text{H}$  NMR (600 MHz,  $\text{CDCl}_3$ )  $\delta$  10.84 (1H, s), 8.59 (1H, d,  $J = 3.0$  Hz), 8.20 (1H, d,  $J = 3.0$  Hz), 7.50-7.44 (3H, m), 7.38-7.36 (2H, m), 7.19 (1H, dd,  $J =$

2.4, 8.4 Hz), 7.00-6.97 (2H, m), 4.35 (2H, q,  $J = 7.2$  Hz), 3.73 (3H, s), 1.34 (3H, t,  $J = 7.2$  Hz);  $^{13}\text{C}$  NMR (150 MHz,  $\text{CDCl}_3$ )  $\delta$  193.8, 164.1, 158.4, 156.6, 151.8, 146.8, 144.0, 139.6, 129.6, 129.5, 126.4, 124.4, 121.0, 119.8, 118.0, 115.9, 113.8, 61.6, 55.9, 14.2; IR (KBr) 3345, 2953, 1688, 1467, 1339, 1223, 1022, 781, 583  $\text{cm}^{-1}$ ; HRMS  $m/z$  ( $\text{M}^+$ ) calcd for  $\text{C}_{22}\text{H}_{19}\text{NO}_6$ : 393.1212. Found: 393.1209.

**Ethyl 5-(5-fluoro-2-hydroxybenzoyl)-2-oxo-1-phenyl-1,2-dihydropyridine-3-carboxylate**

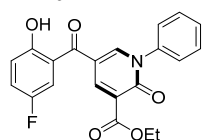

**(4g).** The title compound was prepared according to the general procedure.

The product was obtained as a yellow solid, mp 135-137 °C. Yield: 73%;  $^1\text{H}$  NMR (300 MHz,  $\text{CDCl}_3$ )  $\delta$  10.92 (1H, s), 8.53 (1H, d,  $J = 2.1$  Hz), 8.17 (1H, d,  $J = 2.1$  Hz), 7.50-7.46 (3H, m), 7.37-7.34 (2H, m), 7.25-7.18 (2H, m), 7.01-

6.97 (1H, m), 4.34 (2H, q,  $J = 6.9$  Hz), 1.33 (3H, t,  $J = 6.9$  Hz);  $^{13}\text{C}$  NMR (150 MHz,  $\text{CDCl}_3$ )  $\delta$  193.3, 164.0, 158.4, 158.3, 154.7 (d,  $J = 239.1$  Hz), 146.8, 143.7, 139.5, 129.6, 129.6, 126.4, 124.0 (d,  $J = 22.9$  Hz), 121.3, 120.2 (d,  $J = 6.9$  Hz), 118.1 (d,  $J = 5.7$  Hz), 116.2 (d,  $J = 22.5$  Hz), 115.5, 61.7, 14.1;  $^{19}\text{F}$  NMR (564 MHz,  $\text{CDCl}_3$ )  $\delta$  -124.12 – -124.16 (1F, m); IR (KBr) 3444, 3080, 1678, 1589, 1437, 1286, 950, 760, 519  $\text{cm}^{-1}$ ; HRMS  $m/z$  ( $\text{M}^+$ ) calcd for  $\text{C}_{21}\text{H}_{16}\text{FNO}_5$ : 381.1013. Found: 381.1015.

**Ethyl 5-(5-bromo-2-hydroxybenzoyl)-2-oxo-1-phenyl-1,2-dihydropyridine-3-carboxylate**

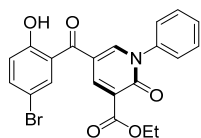

**(4h).** The title compound was prepared according to the general procedure.

The product was obtained as a brown solid, mp 154-156 °C. Yield: 75%;  $^1\text{H}$  NMR (300 MHz,  $\text{CDCl}_3$ )  $\delta$  11.10 (1H, s), 8.53 (1H, d,  $J = 2.1$  Hz), 8.18 (1H, d,  $J = 2.1$  Hz), 7.68 (1H, d,  $J = 2.4$  Hz), 7.57-7.45 (4H, m), 7.37 (2H, d,  $J =$

7.8 Hz), 6.95 (1H, d,  $J = 8.1$  Hz), 4.35 (2H, q,  $J = 6.9$  Hz), 1.35 (3H, t,  $J = 6.9$  Hz);  $^{13}\text{C}$  NMR (75 MHz,  $\text{CDCl}_3$ )  $\delta$  193.1, 163.8, 161.1, 158.2, 147.0, 143.6, 139.5, 138.9, 133.4, 129.6, 129.5, 126.3, 121.3, 120.8, 120.0, 115.3, 110.7, 61.7, 14.1; IR (KBr) 3350, 3097, 1687, 1582, 1514, 1290, 787, 513  $\text{cm}^{-1}$ ; HRMS  $m/z$  ( $\text{M}^+$ ) calcd for  $\text{C}_{21}\text{H}_{16}\text{BrNO}_5$ : 441.0212. Found: 441.0209.

**Ethyl 5-(5-chloro-2-hydroxy-4-methylbenzoyl)-2-oxo-1-phenyl-1,2-dihydropyridine-3-carboxylate**

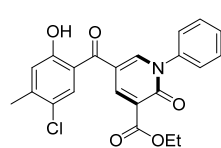

**(4i).** The title compound was prepared according to the general

procedure. The product was obtained as a yellow solid, mp 185-187 °C.

Yield: 71%;  $^1\text{H}$  NMR (300 MHz,  $\text{CDCl}_3$ )  $\delta$  11.13 (1H, s), 8.51 (1H, d,  $J = 2.1$  Hz), 8.15 (1H, d,  $J = 2.1$  Hz), 7.51-7.43 (4H, m), 7.37-7.34 (2H, m), 6.89

(1H, s), 4.33 (2H, q,  $J = 6.9$  Hz), 2.33 (3H, s), 1.33 (3H, t,  $J = 6.9$  Hz);  $^{13}\text{C}$  NMR (75 MHz,  $\text{CDCl}_3$ )  $\delta$  192.8, 163.8, 160.6, 158.3, 146.7, 145.7, 143.7, 139.5, 130.7, 129.5, 129.4, 126.3, 124.4, 121.0, 120.7, 117.5, 115.5, 61.6, 20.7, 14.1; IR (KBr) 3340, 3091, 1675, 1584, 1517, 1280, 771, 514  $\text{cm}^{-1}$ ; HRMS  $m/z$  ( $\text{M}^+$ ) calcd for  $\text{C}_{22}\text{H}_{18}\text{ClNO}_5$ : 411.0874. Found: 411.0872.

**Benzyl 5-(2-hydroxy-5-methylbenzoyl)-2-oxo-1-phenyl-1,2-dihydropyridine-3-carboxylate**

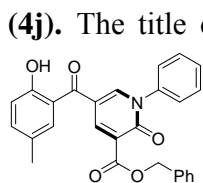

**(4j).** The title compound was prepared according to the general procedure. The product was obtained as a white solid, mp 134-136 °C. Yield: 76%;  $^1\text{H}$  NMR (300 MHz,

CDCl<sub>3</sub>)  $\delta$  11.11 (1H, s), 8.58 (1H, d,  $J$  = 2.1 Hz), 8.18 (1H, d,  $J$  = 2.4 Hz), 7.50-7.30 (12H, m), 6.95 (1H, d,  $J$  = 8.1 Hz), 5.34 (2H, s), 2.25 (3H, s); <sup>13</sup>C NMR (75 MHz, CDCl<sub>3</sub>)  $\delta$  194.2, 163.8, 160.4, 158.3, 146.9, 144.4, 139.6, 137.6, 135.6, 131.1, 129.6, 129.5, 128.5, 128.3, 128.1, 128.1, 126.3, 120.4, 118.6, 118.2, 116.0, 67.1, 20.5; IR (KBr) 3320, 3084, 1680, 1583, 1517, 1271, 760, 508 cm<sup>-1</sup>; HRMS  $m/z$  (M<sup>+</sup>) calcd for C<sub>27</sub>H<sub>21</sub>NO<sub>5</sub>: 439.1420. Found: 439.1417.

### 3-acetyl-5-(2-hydroxy-5-methylbenzoyl)-1-phenylpyridin-2(1H)-one (4k).

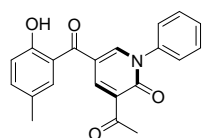

The title compound was prepared according to the general procedure. The product was obtained as a yellow solid, mp 115-117 °C. Yield: 78%; <sup>1</sup>H NMR (300 MHz, CDCl<sub>3</sub>)  $\delta$  11.13 (1H, s), 8.53 (1H, d,  $J$  = 2.1 Hz), 8.21 (1H, d,  $J$  = 2.4 Hz), 7.53-7.47 (3H, m), 7.38 (2H, d,  $J$  = 7.8 Hz), 7.29 (2H, d,  $J$  = 7.8 Hz), 6.92 (1H, d,  $J$  = 8.1 Hz), 2.67 (3H, s), 2.26 (3H, s); <sup>13</sup>C NMR (75 MHz, CDCl<sub>3</sub>)  $\delta$  196.4, 194.5, 160.4, 160.4, 146.9, 143.2, 139.5, 137.6, 131.2, 129.6, 129.6, 128.4, 126.8, 126.3, 118.5, 118.1, 116.8, 30.9, 20.5; IR (KBr) 3330, 3081, 1685, 1580, 1508, 1270, 781, 516 cm<sup>-1</sup>; HRMS  $m/z$  (M<sup>+</sup>) calcd for C<sub>21</sub>H<sub>17</sub>NO<sub>4</sub>: 347.1158. Found: 347.1158.

### Ethyl 5-(1-hydroxy-2-naphthoyl)-2-oxo-1-phenyl-1,2-dihydropyridine-3-carboxylate (4l).

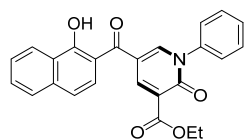

The title compound was prepared according to the general procedure. The product was obtained as a yellow liquid. Yield: 74%; <sup>1</sup>H NMR (600 MHz, CDCl<sub>3</sub>)  $\delta$  13.35 (1H, s), 8.61 (1H, d,  $J$  = 3.0 Hz), 8.45 (1H, d,  $J$  = 8.4 Hz), 8.20 (1H, d,  $J$  = 3.0 Hz), 7.74 (1H, d,  $J$  = 8.4 Hz), 7.63 (1H, t,  $J$  = 7.4 Hz), 7.54-7.48 (4H, m), 7.45 (1H, t,  $J$  = 7.2 Hz), 7.40 (2H, d,  $J$  = 7.2 Hz), 7.28 (1H, d,  $J$  = 9.0 Hz), 4.37 (2H, q,  $J$  = 7.2 Hz), 1.35 (3H, t,  $J$  = 7.2 Hz); <sup>13</sup>C NMR (150 MHz, CDCl<sub>3</sub>)  $\delta$  194.1, 164.2, 163.5, 158.4, 146.5, 144.2, 139.7, 137.2, 130.6, 129.5 (\*3C), 129.4, 127.5, 126.4 (\*2C), 126.3, 125.2, 124.4, 121.0, 118.6, 116.2, 111.7, 61.6, 14.2; IR (neat) 3365, 3060, 2980, 1685, 1589, 1534, 1233, 1143, 711, 581 cm<sup>-1</sup>; HRMS  $m/z$  (M<sup>+</sup>) calcd for C<sub>25</sub>H<sub>19</sub>NO<sub>5</sub>: 413.1263. Found: 413.1261.

### 3-Benzoyl-5-(2-hydroxybenzoyl)-1-phenylpyridin-2(1H)-one (4m).

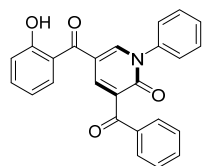

The title compound was prepared according to the general procedure. The product was obtained as a yellow liquid. Yield: 68%; <sup>1</sup>H NMR (600 MHz, CDCl<sub>3</sub>)  $\delta$  11.35 (1H, s), 8.19 (1H, d,  $J$  = 3.0 Hz), 8.14 (1H, d,  $J$  = 3.0 Hz), 7.87 (2H, d,  $J$  = 7.2 Hz), 7.62 (1H, dd,  $J$  = 1.8, 7.8 Hz), 7.55 (1H, t,  $J$  = 7.8 Hz), 7.51-7.48 (3H, m), 7.46-7.74 (5H, m), 7.05 (1H, d,  $J$  = 8.4 Hz), 6.92 (1H, td,  $J$  = 8.4, 1.2 Hz); <sup>13</sup>C NMR (150 MHz, CDCl<sub>3</sub>)  $\delta$  194.5, 193.0, 162.5, 159.3, 145.7, 141.2, 139.5, 136.6, 136.6, 133.5, 131.4, 130.3, 129.6, 129.5, 129.5, 128.5, 126.3, 119.2, 118.9, 118.5, 116.8; IR (neat) 3312, 3059, 1930, 1661, 1593, 1534, 1534, 1233, 1157, 750, 696 cm<sup>-1</sup>; HRMS  $m/z$  (M<sup>+</sup>) calcd for C<sub>25</sub>H<sub>17</sub>NO<sub>4</sub>: 395.1158. Found: 395.1159.

**5-(2-Hydroxybenzoyl)-3-(4-methoxybenzoyl)-1-phenylpyridin-2(1H)-one (4n).**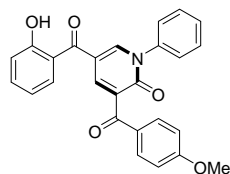

The title compound was prepared according to the general procedure. The product was obtained as a white solid, mp 170-172 °C. Yield: 65%; <sup>1</sup>H NMR (600 MHz, CDCl<sub>3</sub>) δ 11.34 (1H, s), 8.15 (1H, d, *J* = 3.0 Hz), 8.07 (1H, d, *J* = 3.0 Hz), 7.87-7.85 (2H, m), 7.61 (1H, dd, *J* = 1.2, 7.8 Hz), 7.49-7.47 (3H, m), 7.45-7.41 (3H, m), 7.03 (1H, d, *J* = 7.8 Hz), 6.92-6.89 (3H, m), 3.82 (3H, s); <sup>13</sup>C NMR (150 MHz, CDCl<sub>3</sub>) δ 194.6, 191.4, 164.0, 162.5, 159.3, 145.3, 140.5, 139.5, 136.5, 132.1, 131.4, 130.9, 129.5, 129.4, 129.3, 126.3, 119.2, 118.8, 118.6, 116.7, 113.8, 55.5; IR (KBr) 3365, 3054, 1644, 1496, 1237, 1020, 757, 615 cm<sup>-1</sup>; HRMS *m/z* (M<sup>+</sup>) calcd for C<sub>26</sub>H<sub>19</sub>NO<sub>5</sub>: 425.1263. Found: 425.1262.

**5-(2-Hydroxybenzoyl)-3-(4-nitrobenzoyl)-1-phenylpyridin-2(1H)-one (4o).**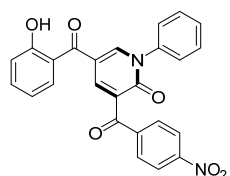

The title compound was prepared according to the general procedure. The product was obtained as a white solid, mp 201-203 °C. Yield: 64%; <sup>1</sup>H NMR (600 MHz, CDCl<sub>3</sub>) δ 11.31 (1H, s), 8.36 (1H, d, *J* = 2.4 Hz), 8.27-8.24 (3H, m), 7.93 (2H, d, *J* = 8.4 Hz), 7.61 (1H, d, *J* = 7.8 Hz), 7.53-7.45 (4H, m), 7.39 (2H, d, *J* = 7.8 Hz), 7.07 (1H, d, *J* = 8.4 Hz), 6.94 (1H, t, *J* = 7.8 Hz); <sup>13</sup>C NMR (150 MHz, CDCl<sub>3</sub>) δ 194.2, 191.8, 162.7, 159.4, 150.0, 146.9, 143.3, 142.1, 139.1, 136.8, 131.3, 129.8 (\*2C), 129.7 (\*3C), 128.3, 126.2 (\*2C), 123.6 (\*2C), 119.3, 119.0, 118.4, 117.2; IR (KBr) 3366, 3055, 1651, 1584, 1416, 1331, 1237, 702 cm<sup>-1</sup>; HRMS *m/z* (M<sup>+</sup>) calcd for C<sub>25</sub>H<sub>16</sub>N<sub>2</sub>O<sub>6</sub>: 440.1008. Found: 440.1008.

**Ethyl 5-(2-hydroxybenzoyl)-1-(3-methoxyphenyl)-2-oxo-1,2-dihydropyridine-3-carboxylate (5a).**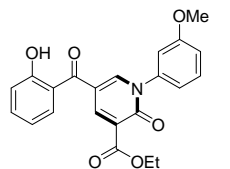

The title compound was prepared according to the general procedure. The product was obtained as a white solid, mp 138-140 °C. Yield: 72%; <sup>1</sup>H NMR (300 MHz, CDCl<sub>3</sub>) δ 11.31 (1H, s), 8.55 (1H, d, *J* = 2.1 Hz), 8.16 (1H, d, *J* = 2.4 Hz), 7.57-7.46 (2H, m), 7.38 (1H, d, *J* = 8.4 Hz), 7.05-6.89 (5H, m), 4.35 (2H, q, *J* = 6.9 Hz), 3.80 (3H, s), 1.34 (3H, t, *J* = 6.9 Hz); <sup>13</sup>C NMR (75 MHz, CDCl<sub>3</sub>) δ 194.3, 164.1, 162.5, 160.3, 158.3, 146.7, 144.0, 140.7, 136.5, 131.3, 130.3, 121.2, 119.2, 118.8, 118.5, 118.4, 115.9, 115.5, 112.3, 61.7, 55.6, 14.2; IR (KBr) 3350, 3071, 1687, 1581, 1518, 1290, 787, 506 cm<sup>-1</sup>; HRMS *m/z* (M<sup>+</sup>) calcd for C<sub>22</sub>H<sub>19</sub>NO<sub>6</sub>: 393.1212. Found: 393.1208.

**Ethyl 5-(2-hydroxybenzoyl)-1-(4-isopropylphenyl)-2-oxo-1,2-dihydropyridine-3-Carboxylate (5b).**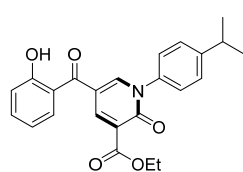

The title compound was prepared according to the general procedure. The product was obtained as yellow solid, mp 68-70 °C. Yield: 76%; <sup>1</sup>H NMR (300 MHz, CDCl<sub>3</sub>) δ 11.27 (1H, s), 8.51 (1H, d, *J* = 2.1 Hz), 8.12 (1H, d, *J* = 2.4 Hz), 7.51 (1H, d, *J* = 8.1 Hz), 7.43 (1H, t, *J* = 8.1 Hz), 7.29-7.21 (4H, m), 6.98 (1H, d, *J* = 8.1 Hz), 6.86 (1H, t, *J* = 8.1 Hz), 4.29 (2H, q, *J* = 6.9 Hz), 2.93-2.84 (1H, m), 1.29 (3H, t, *J* = 6.9 Hz), 1.16 (6H, d, *J* = 8.7 Hz);

$^{13}\text{C}$  NMR (150 MHz,  $\text{CDCl}_3$ )  $\delta$  194.3, 164.2, 162.4, 158.5, 150.4, 146.9, 144.1, 137.2, 136.5, 131.4, 127.6, 126.1, 121.0, 119.2, 118.8, 118.5, 115.8, 61.7, 33.8, 23.9, 23.8, 14.2; IR (KBr) 3340, 3078, 1682, 1540, 1521, 1267, 788, 509  $\text{cm}^{-1}$ ; HRMS  $m/z$  ( $\text{M}^+$ ) calcd for  $\text{C}_{24}\text{H}_{23}\text{NO}_5$ : 405.1576. Found: 405.1574.

**Ethyl 1-(4-aminophenyl)-5-(2-hydroxybenzoyl)-2-oxo-1,2-dihydropyridine-3-carboxylate (5c).** The title compound was prepared according to the general procedure. The product was

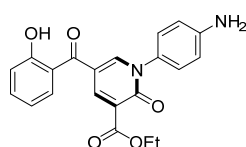

obtained as a yellow solid, mp 153-155  $^{\circ}\text{C}$ . Yield: 72%;  $^1\text{H}$  NMR (600 MHz,  $\text{CDCl}_3$ )  $\delta$  11.35 (1H, s), 8.52 (1H, d,  $J = 3.0$  Hz), 8.14 (1H, d,  $J = 3.0$  Hz), 7.54 (1H, d,  $J = 8.4$  Hz), 7.47 (1H, t,  $J = 8.4$  Hz), 7.07 (2H, d,  $J = 8.4$  Hz), 7.02 (1H, d,  $J = 8.4$  Hz), 6.90 (1H, t,  $J = 7.8$  Hz), 6.65 (2H, d,  $J = 8.4$  Hz), 4.33 (2H, q,  $J = 7.2$  Hz), 3.94 (2H, brs), 1.33 (3H, t,  $J = 7.2$  Hz);  $^{13}\text{C}$  NMR (150 MHz,  $\text{CDCl}_3$ )  $\delta$  194.2, 164.1, 162.1, 158.8, 147.7, 147.4, 143.7, 136.2, 131.3, 129.8, 127.0, 120.5, 119.1, 118.6, 118.6, 115.5, 114.9, 61.4, 14.1; IR (KBr) 3356, 3063, 2979, 1730, 1610, 1274, 1155, 833, 756, 519  $\text{cm}^{-1}$ ; HRMS  $m/z$  ( $\text{M}^+$ ) calcd for  $\text{C}_{21}\text{H}_{18}\text{N}_2\text{O}_5$ : 378.1216. Found: 378.1215.

**Ethyl 5-(2-hydroxybenzoyl)-1-(2-(hydroxymethyl)phenyl)-2-oxo-1,2-dihydropyridine-3-carboxylate (5d).** The title compound was prepared according to the general procedure. The

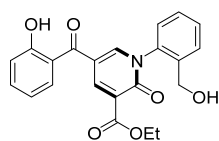

product was obtained as a yellow liquid. Yield: 68%;  $^1\text{H}$  NMR (600 MHz,  $\text{CDCl}_3$ )  $\delta$  11.28 (1H, s), 8.61 (1H, d,  $J = 1.2$  Hz), 8.08 (1H, d,  $J = 2.4$  Hz), 7.58 (1H, d,  $J = 8.4$  Hz), 8.08 (1H, d,  $J = 7.2$  Hz), 7.47-7.44 (2H, m), 7.40 (1H, t,  $J = 7.8$  Hz), 7.15 (1H, d,  $J = 7.8$  Hz), 7.01 (1H, d,  $J = 8.4$  Hz), 6.87 (1H, t,  $J = 7.8$  Hz), 4.43 (2H, d,  $J = 2.4$  Hz), 4.32 (2H, q,  $J = 7.2$  Hz), 3.09 (1H, brs), 1.33 (3H, t,  $J = 7.2$  Hz);  $^{13}\text{C}$  NMR (150 MHz,  $\text{CDCl}_3$ )  $\delta$  194.2, 163.8, 162.3, 159.1, 147.4, 144.6, 138.3, 137.3, 136.5, 131.5, 130.4, 130.3, 129.3, 127.1, 120.8, 119.2, 118.7, 118.6, 116.0, 61.7, 61.4, 14.1; IR (neat) 3429, 3066, 2980, 1722, 1600, 1532, 1229, 1022, 750  $\text{cm}^{-1}$ ; HRMS  $m/z$  ( $\text{M}^+$ ) calcd for  $\text{C}_{22}\text{H}_{19}\text{NO}_6$ : 393.1212. Found: 393.1212.

**Ethyl 1-(3-bromophenyl)-5-(2-hydroxybenzoyl)-2-oxo-1,2-dihydropyridine-3-carboxylate (5e).** The title compound was prepared according to the general procedure. The product was

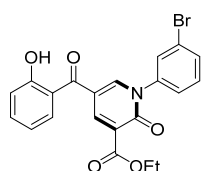

obtained as a yellow solid, mp 148-150  $^{\circ}\text{C}$ . Yield: 74%;  $^1\text{H}$  NMR (300 MHz,  $\text{CDCl}_3$ )  $\delta$  11.22 (1H, s), 8.51 (1H, d,  $J = 2.1$  Hz), 8.11 (1H, d,  $J = 2.4$  Hz), 7.54-7.43 (4H, m), 7.36-7.28 (2H, m), 6.99 (1H, d,  $J = 8.4$  Hz), 6.89 (1H, t,  $J = 8.1$  Hz), 4.31 (2H, q,  $J = 6.9$  Hz), 1.31 (3H, t,  $J = 6.9$  Hz);  $^{13}\text{C}$  NMR (75 MHz,  $\text{CDCl}_3$ )  $\delta$  194.0, 163.7, 162.2, 158.0, 146.2, 144.1, 140.4, 136.4, 132.5, 131.2, 130.6, 129.6, 125.1, 122.6, 121.0, 119.1, 118.7, 118.4, 116.1, 61.6, 14.0; IR (KBr) 3345, 3045, 1665, 1590, 1521, 1280, 771, 509  $\text{cm}^{-1}$ ; HRMS  $m/z$  ( $\text{M}^+$ ) calcd for  $\text{C}_{21}\text{H}_{16}\text{BrNO}_5$ : 441.0212. Found: 441.0210.

**Ethyl 1-(3-fluorophenyl)-5-(2-hydroxybenzoyl)-2-oxo-1,2-dihydropyridine-3-carboxylate (5f).**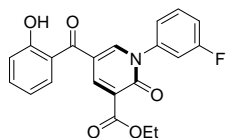

The title compound was prepared according to the general procedure. The product was obtained as a white solid, mp 143-145 °C. Yield: 75%; <sup>1</sup>H NMR (300 MHz, CDCl<sub>3</sub>) δ 11.24 (1H, s), 8.52 (1H, d, *J* = 2.1 Hz), 8.13 (1H, d, *J* = 2.4 Hz), 7.55-7.40 (3H, m), 7.15 (3H, d, *J* = 7.8 Hz), 7.01 (1H, d, *J* = 8.4 Hz), 6.90 (1H, t, *J* = 7.5 Hz), 4.31 (2H, q, *J* = 6.9 Hz), 1.32 (3H, t, *J* = 6.9 Hz); <sup>13</sup>C NMR (150 MHz, CDCl<sub>3</sub>) δ 194.1, 163.9, 162.5 (d, *J* = 248.4 Hz), 162.5, 158.1, 146.2, 144.1, 140.6 (d, *J* = 10.3 Hz), 136.6, 131.3, 130.9 (d, *J* = 9.1 Hz), 122.2 (d, *J* = 3.4 Hz), 121.3, 119.2, 118.8, 118.4, 116.7 (d, *J* = 20.7 Hz), 116.2, 114.5 (d, *J* = 24.1 Hz), 61.7, 14.1; <sup>19</sup>F NMR (564 MHz, CDCl<sub>3</sub>) δ -111.25 – -111.30 (1F, m); IR (KBr) 3360, 3089, 1685, 1596, 1527, 1290, 761, 512 cm<sup>-1</sup>; HRMS *m/z* (M<sup>+</sup>) calcd for C<sub>21</sub>H<sub>16</sub>FNO<sub>5</sub>: 381.1013. Found: 381.1011.

**Ethyl 5-(2-hydroxybenzoyl)-1-(3-nitrophenyl)-2-oxo-1,2-dihydropyridine-3-carboxylate (5g).**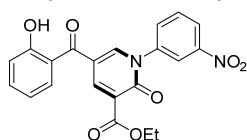

The title compound was prepared according to the general procedure. The product was obtained as a white solid, mp 179-181 °C. Yield: 52%; <sup>1</sup>H NMR (600 MHz, CDCl<sub>3</sub>) δ 11.22 (1H, s), 8.55 (1H, d, *J* = 3.0 Hz), 8.29-8.28 (2H, m), 8.17 (1H, d, *J* = 3.0 Hz), 7.78-7.76 (1H, m), 7.69 (1H, t, *J* = 9.0 Hz), 7.55 (1H, dd, *J* = 1.2, 7.8 Hz), 7.50-7.47 (1H, m), 7.02 (1H, d, *J* = 8.4 Hz), 6.91 (1H, t, *J* = 7.2 Hz), 4.32 (2H, q, *J* = 7.2 Hz), 1.33 (3H, t, *J* = 7.2 Hz); <sup>13</sup>C NMR (150 MHz, CDCl<sub>3</sub>) δ 194.0, 163.5, 162.4, 158.0, 148.5, 145.7, 144.4, 140.2, 136.7, 132.8, 131.3, 130.5, 124.3, 122.1, 121.3, 119.3, 118.8, 118.3, 116.7, 61.8, 14.1; IR (KBr) 3430, 3065, 2970, 1720, 1602, 1522, 1225, 1020, 755 cm<sup>-1</sup>; HRMS *m/z* (M<sup>+</sup>) calcd for C<sub>21</sub>H<sub>16</sub>N<sub>2</sub>O<sub>7</sub>: 408.0958. Found: 409.0958.

**Ethyl 1-(4-fluorophenyl)-5-(2-hydroxybenzoyl)-2-oxo-1,2-dihydropyridine-3-carboxylate (5h).**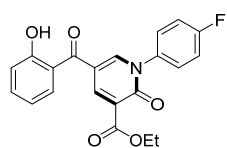

The title compound was prepared according to the general procedure. The product was obtained as a white solid, mp 170-172 °C. Yield: 77%; <sup>1</sup>H NMR (300 MHz, CDCl<sub>3</sub>) δ 11.28 (1H, s), 8.54 (1H, d, *J* = 2.1 Hz), 8.13 (1H, d, *J* = 2.4 Hz), 7.56-7.46 (2H, m), 7.39-7.34 (2H, m), 7.16 (2H, t, *J* = 7.8 Hz), 7.03 (1H, d, *J* = 7.8 Hz), 6.91 (1H, t, *J* = 7.8 Hz), 4.34 (2H, q, *J* = 6.9 Hz), 1.33 (3H, t, *J* = 6.9 Hz); <sup>13</sup>C NMR (150 MHz, CDCl<sub>3</sub>) δ 194.3, 164.0, 162.7 (d, *J* = 248.2 Hz), 162.6, 158.4, 146.5, 144.2, 136.6, 135.5 (d, *J* = 3.4 Hz), 131.3, 128.4 (d, *J* = 7.9 Hz), 121.2, 119.2, 118.9, 118.4, 116.6 (d, *J* = 22.9 Hz), 116.1, 61.8, 14.2; <sup>19</sup>F NMR (564 MHz, CDCl<sub>3</sub>) δ -111.96 – -112.01 (1F, m); IR (KBr) 3360, 3083, 1687, 1584, 1528, 1275, 786, 517 cm<sup>-1</sup>; HRMS *m/z* (M<sup>+</sup>) calcd for C<sub>21</sub>H<sub>16</sub>FNO<sub>5</sub>: 381.1013. Found: 344.1013.

**Benzyl 1-(4-fluorophenyl)-5-(2-hydroxybenzoyl)-2-oxo-1,2-dihydropyridine-3-carboxylate (5i).**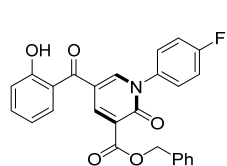

The title compound was prepared according to the general procedure. The product was obtained as a white solid, mp 148-150 °C. Yield: 73%; <sup>1</sup>H NMR (300 MHz, CDCl<sub>3</sub>) δ 11.29 (1H, s), 8.58 (1H, d, *J* = 2.1 Hz), 8.15 (1H, d, *J* = 2.4 Hz), 7.55-7.48 (2H, m), 7.43-7.28 (7H, m), 7.18 (2H, t, *J* = 7.8 Hz), 7.05 (1H, d, *J*

= 7.8 Hz), 6.91 (1H, t,  $J$  = 7.8 Hz), 5.34 (2H, s);  $^{13}\text{C}$  NMR (150 MHz,  $\text{CDCl}_3$ )  $\delta$  194.1, 163.8, 162.7 (d,  $J$  = 248.2 Hz), 162.5, 158.3, 146.8, 144.6, 136.6, 135.4 (d,  $J$  = 4.6 Hz), 131.3, 128.5, 128.4, 128.4, 128.2, 128.1, 120.6, 119.2, 118.9, 118.4, 116.6 (d,  $J$  = 22.9 Hz), 116.0, 67.2;  $^{19}\text{F}$  NMR (564 MHz,  $\text{CDCl}_3$ )  $\delta$  -111.89 – -111.93 (1F, m); IR (KBr) 3350, 3071, 1695, 1590, 1507, 1268, 788, 507  $\text{cm}^{-1}$ ; HRMS  $m/z$  ( $\text{M}^+$ ) calcd for  $\text{C}_{26}\text{H}_{18}\text{FNO}_5$ : 443.1169. Found: 443.1167.

**Ethyl 1-(4-cyanophenyl)-5-(2-hydroxybenzoyl)-2-oxo-1,2-dihydropyridine-3-carboxylate (5j).** The title compound was prepared according to the general procedure. The product was

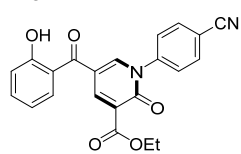

obtained as a yellow solid, mp 188-190 °C. Yield: 41%;  $^1\text{H}$  NMR (600 MHz,  $\text{CDCl}_3$ )  $\delta$  11.25 (1H, s), 8.55 (1H, d,  $J$  = 3.0 Hz), 8.11 (1H, d,  $J$  = 3.0 Hz), 7.79 (2H, d,  $J$  = 7.8 Hz), 7.56-7.49 (4H, m), 7.04 (1H, d,  $J$  = 8.4 Hz), 6.92 (1H, t,  $J$  = 7.2 Hz), 4.34 (2H, q,  $J$  = 7.2 Hz), 1.33 (3H, t,  $J$  = 7.2 Hz);  $^{13}\text{C}$  NMR (150 MHz,  $\text{CDCl}_3$ )  $\delta$  194.0, 163.6, 162.5, 157.9, 145.5, 144.3, 143.0, 136.8, 133.4, 133.1, 131.2, 127.6, 119.3, 119.0, 118.3, 117.4, 116.7, 113.6, 61.8, 14.1; IR (KBr) 3363, 3078, 1734, 1657, 1599, 1269, 1144, 556, 647  $\text{cm}^{-1}$ ; HRMS  $m/z$  ( $\text{M}^+$ ) calcd for  $\text{C}_{22}\text{H}_{16}\text{N}_2\text{O}_5$ : 388.1059. Found: 388.1059.

**Ethyl 1-(2-(4-bromobenzoyl)phenyl)-5-(2-hydroxybenzoyl)-2-oxo-1,2-dihydropyridine-3-carboxylate (5k).** The title compound was prepared according to the general procedure. The

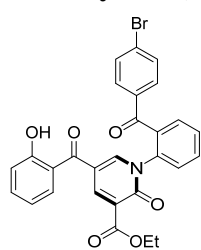

product was obtained as a yellow liquid. Yield: 53%;  $^1\text{H}$  NMR (600 MHz,  $\text{CDCl}_3$ )  $\delta$  11.36 (1H, s), 8.53 (1H, d,  $J$  = 2.4 Hz), 8.16 (1H, d,  $J$  = 3.0 Hz), 7.75 (1H, dd,  $J$  = 1.8, 8.4 Hz), 7.68-7.65 (3H, m), 7.57-7.54 (3H, m), 7.52-7.47 (2H, m), 7.38 (1H, d,  $J$  = 8.4 Hz), 7.04 (1H, d,  $J$  = 7.8 Hz), 6.92 (1H, t,  $J$  = 7.2 Hz), 4.27 (2H, q,  $J$  = 7.2 Hz), 1.28 (3H, t,  $J$  = 7.2 Hz);  $^{13}\text{C}$  NMR (150 MHz,  $\text{CDCl}_3$ )  $\delta$  194.4, 193.9, 163.6, 162.5, 158.3, 147.5, 144.3, 138.2, 136.5, 136.3, 135.0, 132.4, 131.9 (\*2C), 131.8 (\*3C), 130.0, 129.3, 128.9, 128.3, 121.1, 119.3, 118.7, 118.6, 115.3, 61.5, 14.1; IR (KBr) 3369, 3070, 1730, 1666, 1595, 1269, 1148, 571, 640  $\text{cm}^{-1}$ ; HRMS  $m/z$  ( $\text{M}^+$ ) calcd for  $\text{C}_{28}\text{H}_{20}\text{BrNO}_6$ : 545.0474. Found: 545.0475.

**Ethyl 1-(4-fluorophenyl)-5-(2-hydroxy-5-methylbenzoyl)-2-oxo-1,2-dihydropyridine-3-carboxylate (5l).** The title compound was prepared according to the general

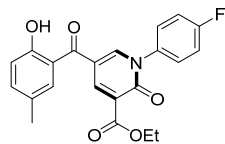

procedure. The product was obtained as a white solid, mp 174-176 °C. Yield: 78%;  $^1\text{H}$  NMR (300 MHz,  $\text{CDCl}_3$ )  $\delta$  11.10 (1H, s), 8.55 (1H, d,  $J$  = 2.1 Hz), 8.14 (1H, d,  $J$  = 2.4 Hz), 7.39-7.31 (4H, m), 7.18 (1H, t,  $J$  = 8.1 Hz), 6.95 (1H, d,  $J$  = 8.1 Hz), 4.35 (2H, q,  $J$  = 6.9 Hz), 2.28 (3H, s), 1.35 (3H, t,  $J$  = 6.9 Hz);  $^{13}\text{C}$  NMR (150 MHz,  $\text{CDCl}_3$ )  $\delta$  194.2, 164.0, 162.7 (d,  $J$  = 248.2 Hz), 160.5, 158.4, 146.5, 144.3, 137.7, 135.5 (d,  $J$  = 3.4 Hz), 131.1, 128.4 (d,  $J$  = 3.4 Hz), 128.3, 121.0, 118.7, 118.1, 116.6 (d,  $J$  = 22.9 Hz), 116.3, 61.7, 20.6, 14.2;  $^{19}\text{F}$  NMR (564 MHz,  $\text{CDCl}_3$ )  $\delta$  -112.00 – -112.04 (1F, m); IR (KBr) 3434, 3054, 1663, 1436, 1276, 970, 760, 516  $\text{cm}^{-1}$ ; HRMS  $m/z$  ( $\text{M}^+$ ) calcd for  $\text{C}_{22}\text{H}_{18}\text{FNO}_5$ : 395.1169. Found: 395.1170.

**Ethyl 5-(5-bromo-2-hydroxybenzoyl)-1-(4-isopropylphenyl)-2-oxo-1,2-dihydropyridine-3-carboxylate (5m).**

The title compound was prepared according to the general procedure. The product was obtained as a yellow solid, mp 80-82 °C. Yield: 69%; <sup>1</sup>H NMR (300 MHz, CDCl<sub>3</sub>) δ 11.18 (1H, s), 8.54 (1H, d, *J* = 2.1 Hz), 8.17 (1H, d, *J* = 2.4 Hz), 7.68 (1H, d, *J* = 2.1 Hz), 7.57 (1H, dd, *J* = 2.1, 8.1 Hz), 7.37-7.28 (4H, m), 6.97 (1H, d, *J* = 8.1 Hz), 4.37 (2H, q, *J* = 6.9 Hz), 3.00-2.89 (1H, m), 1.36 (3H, t, *J* = 6.9 Hz), 1.26 (6H, d, *J* = 8.7 Hz); <sup>13</sup>C NMR (150 MHz, CDCl<sub>3</sub>) δ 193.3, 164.0, 161.3, 158.4, 150.6, 147.1, 143.7, 139.0, 137.1, 133.4, 127.7, 126.1, 121.3, 120.8, 119.9, 115.3, 110.7, 61.7, 33.9, 23.8, 14.2; IR (KBr) 3310, 3051, 1690, 1584, 1530, 1268, 793, 509 cm<sup>-1</sup>; HRMS *m/z* (M<sup>+</sup>) calcd for C<sub>24</sub>H<sub>22</sub>BrNO<sub>5</sub>: 483.0681. Found: 483.0681.

**Ethyl 5-(5-bromo-2-hydroxybenzoyl)-1-(4-fluorophenyl)-2-oxo-1,2-dihydropyridine-3-carboxylate (5n).**

The title compound was prepared according to the general procedure. The product was obtained as a white solid, mp 195-197 °C. Yield: 75%; <sup>1</sup>H NMR (300 MHz, CDCl<sub>3</sub>) δ 11.19 (1H, s), 8.58 (1H, d, *J* = 2.1 Hz), 8.19 (1H, d, *J* = 2.4 Hz), 7.18 (1H, d, *J* = 2.1 Hz), 7.62 (1H, dd, *J* = 2.1, 8.7 Hz), 7.44-7.740 (2H, m), 7.28-7.21 (2H, m), 7.02 (1H, d, *J* = 7.8 Hz), 4.41 (2H, q, *J* = 6.9 Hz), 1.40 (3H, t, *J* = 6.9 Hz); <sup>13</sup>C NMR (150 MHz, CDCl<sub>3</sub>) δ 193.2, 163.8, 162.8 (d, *J* = 249.6 Hz), 161.3, 158.3, 146.8, 143.8, 139.2, 135.4 (d, *J* = 3.4 Hz), 133.4, 128.4 (d, *J* = 9.3 Hz), 121.4, 120.9, 119.8, 116.7 (d, *J* = 22.9 Hz), 115.5, 110.8, 61.8, 14.2; <sup>19</sup>F NMR (564 MHz, CDCl<sub>3</sub>) δ -111.75 – -111.79 (1F, m); IR (KBr) 3350, 3054, 1663, 1560, 1276, 760, 516 cm<sup>-1</sup>; HRMS *m/z* (M<sup>+</sup>) calcd for C<sub>21</sub>H<sub>15</sub>BrFNO<sub>5</sub>: 459.0118. Found: 459.0115.

**Methyl 5-(2-hydroxybenzoyl)-2-oxo-1-phenethyl-1,2-dihydropyridine-3-carboxylate (6a).**

The title compound was prepared according to the general procedure. The product was obtained as a white solid, mp 148-150 °C. Yield: 78%; <sup>1</sup>H NMR (300 MHz, CDCl<sub>3</sub>) δ 11.21 (1H, s), 8.49 (1H, s), 7.56 (1H, s), 7.39 (1H, t, *J* = 7.5 Hz), 7.28-7.26 (3H, m), 7.10-7.08 (2H, m), 6.93 (1H, d, *J* = 8.4 Hz), 6.76-6.67 (2H, m), 4.19 (2H, t, *J* = 6.3 Hz), 3.86 (3H, s), 3.10 (2H, t, *J* = 6.3 Hz); <sup>13</sup>C NMR (75 MHz, CDCl<sub>3</sub>) δ 193.8, 164.5, 162.1, 158.4, 147.1, 144.3, 137.0, 136.0, 130.9, 129.0, 128.9, 127.0, 119.7, 119.0, 118.5, 118.2, 114.9, 53.9, 52.4, 34.1; IR (KBr) 3342, 3074, 1687, 1592, 1509, 1281, 791, 508 cm<sup>-1</sup>; HRMS *m/z* (M<sup>+</sup>) calcd for C<sub>22</sub>H<sub>19</sub>NO<sub>5</sub>: 377.1263. Found: 377.1263.

**Ethyl 5-(2-hydroxybenzoyl)-2-oxo-1-phenethyl-1,2-dihydropyridine-3-carboxylate (6b).**

The title compound was prepared according to the general procedure. The product was obtained as a light yellow solid, mp 175-177 °C. Yield: 76%; <sup>1</sup>H NMR (300 MHz, CDCl<sub>3</sub>) δ 11.24 (1H, s), 8.49 (1H, s), 7.45 (1H, s), 7.45-7.39 (1H, m), 7.30-7.23 (3H, m), 7.11-7.10 (2H, m), 6.97 (1H, d, *J* =

8.4 Hz), 6.77-6.69 (2H, m), 4.36 (2H, q,  $J = 6.9$  Hz), 4.21 (2H, t,  $J = 6.3$  Hz), 3.13 (2H, t,  $J = 6.3$  Hz), 1.36 (3H, t,  $J = 6.9$  Hz);  $^{13}\text{C}$  NMR (75 MHz,  $\text{CDCl}_3$ )  $\delta$  193.9, 164.0, 162.2, 158.5, 147.0, 143.9, 137.1, 136.0, 131.0, 129.1, 129.0, 127.1, 120.3, 119.1, 118.6, 118.3, 114.9, 61.5, 54.0, 34.2, 14.2; IR (KBr) 3348, 3071, 1693, 1587, 1513, 1274, 778, 512  $\text{cm}^{-1}$ ; HRMS  $m/z$  ( $\text{M}^+$ ) calcd for  $\text{C}_{23}\text{H}_{21}\text{NO}_5$ : 391.1420. Found: 391.1418.

**Benzyl 5-(2-hydroxybenzoyl)-2-oxo-1-phenethyl-1,2-dihydropyridine-3-carboxylate (6c).**

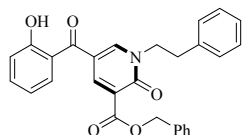

The title compound was prepared according to the general procedure. The product was obtained as a white solid, mp 65-67 °C. Yield: 75%;  $^1\text{H}$  NMR (300 MHz,  $\text{CDCl}_3$ )  $\delta$  11.23 (1H, s), 8.50 (1H, d,  $J = 2.4$  Hz), 7.57 (1H, d,  $J = 2.4$  Hz), 7.45-7.26 (9H, m), 7.12-7.10 (2H, m), 6.96 (1H, d,  $J = 8.1$  Hz), 6.79-6.69 (2H, m), 5.33 (2H, s), 4.21 (2H, t,  $J = 6.3$  Hz), 3.12 (2H, t,  $J = 6.3$  Hz);  $^{13}\text{C}$  NMR (150 MHz,  $\text{CDCl}_3$ )  $\delta$  193.9, 163.8, 162.3, 158.5, 147.1, 144.2, 137.1, 136.1, 135.6, 131.0, 129.1, 129.0, 128.6, 128.2, 128.2, 127.1, 119.9, 119.0, 118.6, 118.3, 114.9, 67.1, 54.0, 34.2; IR (KBr) 3434, 3054, 1663, 1575, 1436, 1276, 970, 760, 526  $\text{cm}^{-1}$ ; HRMS  $m/z$  ( $\text{M}^+$ ) calcd for  $\text{C}_{28}\text{H}_{23}\text{NO}_5$ : 453.1576. Found: 453.1573.

**Ethyl 5-(2-hydroxy-5-methylbenzoyl)-2-oxo-1-phenethyl-1,2-dihydropyridine-3-carboxylate (6d).**

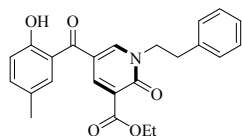

The title compound was prepared according to the general procedure. The product was obtained as a yellow solid, mp 197-199 °C. Yield: 77%;  $^1\text{H}$  NMR (300 MHz,  $\text{CDCl}_3$ )  $\delta$  11.06 (1H, s), 8.52 (1H, d,  $J = 2.1$  Hz), 7.87 (1H, d,  $J = 2.4$  Hz), 7.37-7.24 (4H, m), 7.22-7.20 (3H, m), 7.18 (1H, d,  $J = 8.1$  Hz), 4.41 (2H, q,  $J = 6.9$  Hz), 4.29 (2H, t,  $J = 6.3$  Hz), 3.15 (2H, t,  $J = 6.3$  Hz), 2.30 (3H, s), 1.41 (3H, t,  $J = 6.9$  Hz);  $^{13}\text{C}$  NMR (75 MHz,  $\text{CDCl}_3$ )  $\delta$  193.9, 163.9, 160.0, 158.4, 146.7, 143.7, 137.1, 136.9, 130.8, 128.7, 128.1, 127.0, 119.6, 118.3, 118.2, 115.3, 61.3, 53.3, 34.6, 20.4, 14.1; IR (KBr) 3340, 3091, 1678, 1582, 1508, 1272, 783, 517  $\text{cm}^{-1}$ ; HRMS  $m/z$  ( $\text{M}^+$ ) calcd for  $\text{C}_{24}\text{H}_{23}\text{NO}_5$ : 405.1576. Found: 405.1575.

**Ethyl 5-(5-bromo-2-hydroxybenzoyl)-2-oxo-1-phenethyl-1,2-dihydropyridine-3-carboxylate (6e).**

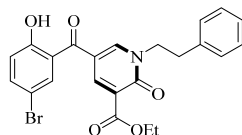

The title compound was prepared according to the general procedure. The product was obtained as a yellow solid, mp 183-185 °C. Yield: 72%;  $^1\text{H}$  NMR (300 MHz,  $\text{CDCl}_3$ )  $\delta$  11.12 (1H, s), 8.53 (1H, d,  $J = 2.1$  Hz), 7.90 (1H, d,  $J = 2.4$  Hz), 7.65-7.62 (1H, m), 7.56 (1H, s), 7.35-7.28 (3H, m), 7.24-7.21 (2H, m), 7.03 (1H, d,  $J = 8.1$  Hz), 4.45 (2H, q,  $J = 6.9$  Hz), 4.35 (2H, t,  $J = 6.3$  Hz), 3.19 (2H, t,  $J = 6.3$  Hz), 1.46 (3H, t,  $J = 6.9$  Hz);  $^{13}\text{C}$  NMR (75 MHz,  $\text{CDCl}_3$ )  $\delta$  192.8, 163.7, 160.9, 158.3, 147.0, 143.3, 138.7, 136.8, 133.1, 128.9, 128.8, 127.1, 120.6, 120.0, 114.7, 110.6, 61.5, 53.3, 34.7, 14.2; IR (KBr) 3340, 3097, 1693, 1585, 1524, 1294, 771, 524  $\text{cm}^{-1}$ ; HRMS  $m/z$  ( $\text{M}^+$ ) calcd for  $\text{C}_{23}\text{H}_{20}\text{BrNO}_5$ : 469.0525. Found: 469.0523.

**Ethyl 1-(2-(1H-indol-3-yl)ethyl)-5-(2-hydroxybenzoyl)-2-oxo-1,2-dihydropyridine-3-carboxylate (6f).**

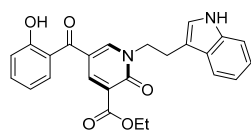

The title compound was prepared according to the general procedure. The product was obtained as a yellow solid, mp 240-242 °C. Yield: 65%; <sup>1</sup>H NMR (300 MHz, CDCl<sub>3</sub>) δ 10.69 (1H, s), 10.44 (1H, s), 8.42 (1H, d, *J* = 2.1 Hz), 7.63 (1H, d, *J* = 2.1 Hz), 7.41-7.26 (3H, m), 7.05 (1H, t, *J* = 8.1 Hz), 6.94-6.84 (3H, m), 6.61 (1H, t, *J* = 7.5 Hz), 6.48 (1H, d, *J* = 7.8 Hz), 4.31 (2H, q, *J* = 6.9 Hz), 4.22 (2H, t, *J* = 6.3 Hz), 3.20 (2H, t, *J* = 6.3 Hz), 1.34 (3H, t, *J* = 6.9 Hz); <sup>13</sup>C NMR (75 MHz, CDCl<sub>3</sub>) δ 192.5, 163.5, 159.4, 158.2, 147.8, 143.1, 136.1, 134.4, 130.1, 126.6, 123.0, 121.1, 119.7, 119.0, 118.7, 118.6, 117.4, 117.2, 114.3, 111.3, 109.5, 60.6, 52.3, 23.6, 13.8; IR (KBr) 3434, 3340, 3054, 1696, 1580, 1276, 970, 767, 506 cm<sup>-1</sup>; HRMS *m/z* (*M*<sup>+</sup>) calcd for C<sub>25</sub>H<sub>22</sub>N<sub>2</sub>O<sub>5</sub>: 430.1529. Found: 430.1526.

**Ethyl (S)-5-(2-hydroxybenzoyl)-2-oxo-1-(1-phenylethyl)-1,2-dihydropyridine-3-carboxylate (6g).**

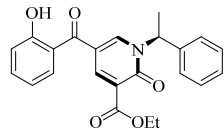

The title compound was prepared according to the general procedure. The product was obtained as a light green liquid. Yield: 67%; <sup>1</sup>H NMR (600 MHz, CDCl<sub>3</sub>) δ 11.26 (1H, s), 8.42 (1H, d, *J* = 3.0 Hz), 7.86 (1H, d, *J* = 3.0 Hz), 7.39 (6H, m), 7.10 (1H, dd, *J* = 1.2, 7.8 Hz), 6.93 (1H, d, *J* = 8.4 Hz), 6.63 (1H, t, *J* = 7.8 Hz), 6.46 (1H, q, *J* = 7.2 Hz), 4.33 (2H, q, *J* = 7.2 Hz), 1.70 (3H, d, *J* = 6.6 Hz), 1.33 (3H, t, *J* = 6.6 Hz); <sup>13</sup>C NMR (150 MHz, CDCl<sub>3</sub>) δ 193.9, 164.0, 162.2, 158.3, 144.1, 142.7, 138.6, 136.0, 130.9, 129.1, 128.6, 127.4, 120.1, 118.6, 118.5, 118.2, 115.4, 61.3, 54.2, 18.7, 14.1; IR (neat) 3350, 2981, 1831, 1727, 1600, 1539, 1228, 1027, 710, 551 cm<sup>-1</sup>; HRMS *m/z* (*M*<sup>+</sup>) calcd for C<sub>23</sub>H<sub>21</sub>NO<sub>5</sub>: 391.1420. Found: 391.1420; [*α*]<sub>D</sub><sup>26</sup> = - 87.7 (*c* 1.0, CH<sub>3</sub>OH).

**Diethyl (Z)-2-((6-nitro-4-(phenethylimino)-4H-chromen-3-yl)methylene)malonate (6h).**

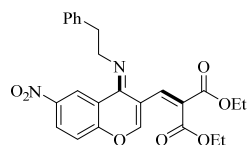

The title compound was prepared according to the general procedure. The product was obtained as a yellow solid, mp 180-182 °C. Yield: 58%; <sup>1</sup>H NMR (600 MHz, CDCl<sub>3</sub>) δ 9.21 (1H, d, *J* = 2.4 Hz), 8.38 (1H, dd, *J* = 2.4, 9.0 Hz), 7.89 (1H, s), 7.64 (1H, s), 7.50 (1H, d, *J* = 9.6 Hz), 7.29-7.25 (3H, m), 7.06 (2H, d, *J* = 7.2 Hz), 4.41 (2H, t, *J* = 7.2 Hz), 4.31 (2H, q, *J* = 6.6 Hz), 4.27 (2H, q, *J* = 7.2 Hz), 3.16 (2H, t, *J* = 7.2 Hz), 1.31 (6H, t, *J* = 7.2 Hz); <sup>13</sup>C NMR (150 MHz, CDCl<sub>3</sub>) δ 174.2, 166.3, 164.6, 146.1, 143.8, 142.2, 135.8, 135.1, 129.2, 128.6, 127.7, 126.6, 126.4, 125.8, 124.3, 116.9, 116.4, 61.6, 61.5, 55.4, 35.2, 14.1, 14.1; IR (KBr) 2979, 1713, 1483, 1335, 1231, 1022, 747 cm<sup>-1</sup>; HRMS *m/z* (*M*<sup>+</sup>) calcd for C<sub>25</sub>H<sub>24</sub>N<sub>2</sub>O<sub>7</sub>: 464.1584. Found: 464.1585.

**$^1\text{H}$  NMR and  $^{13}\text{C}$  NMR Spectra of compounds 4-6**

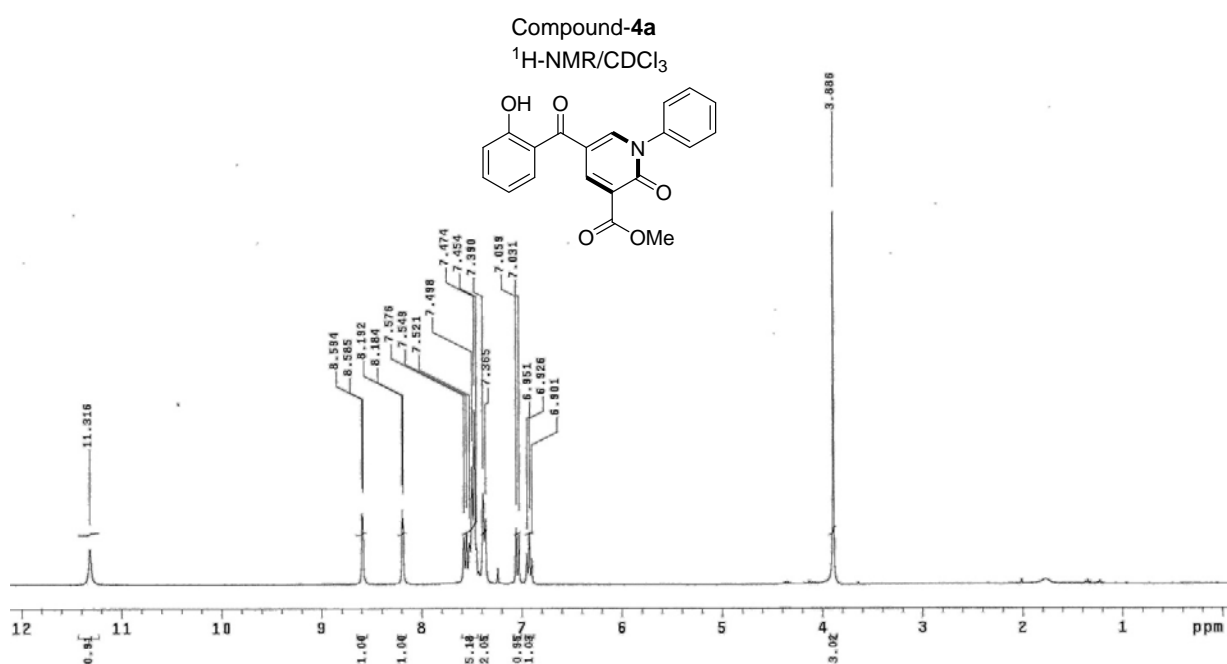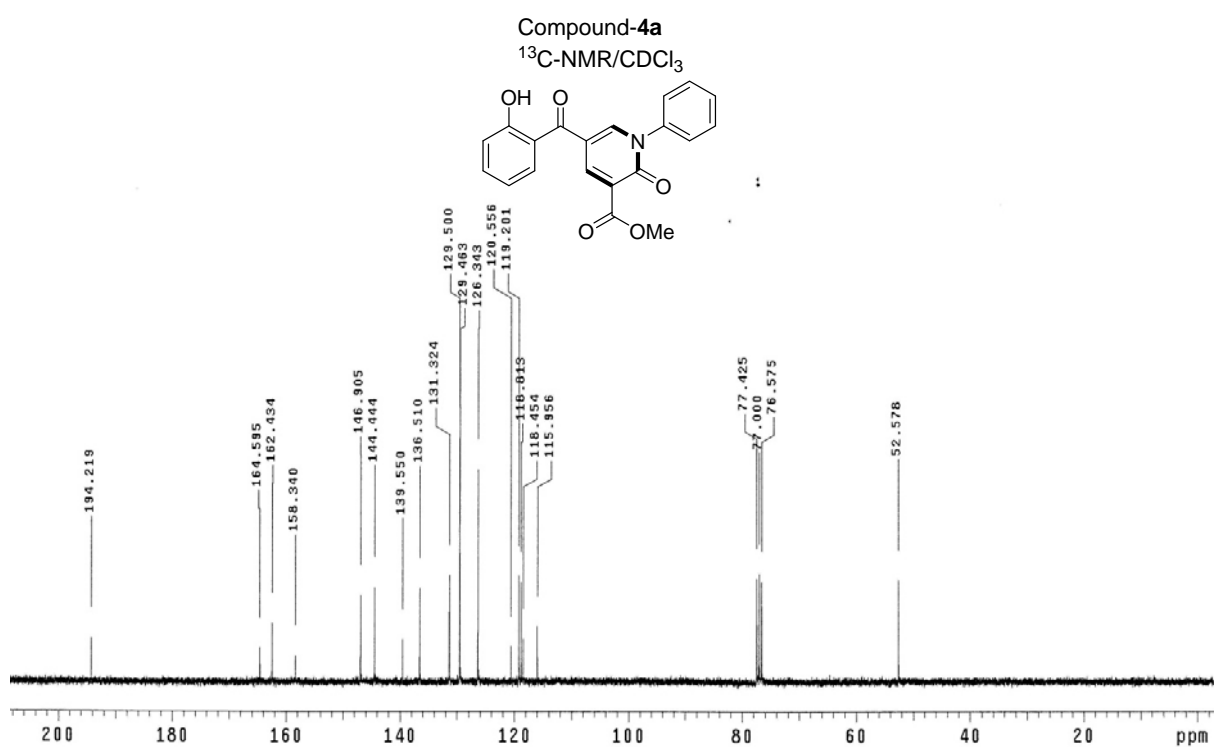

Compound-4a  
<sup>1</sup>H-NMR/CDCl<sub>3</sub>, Expansion

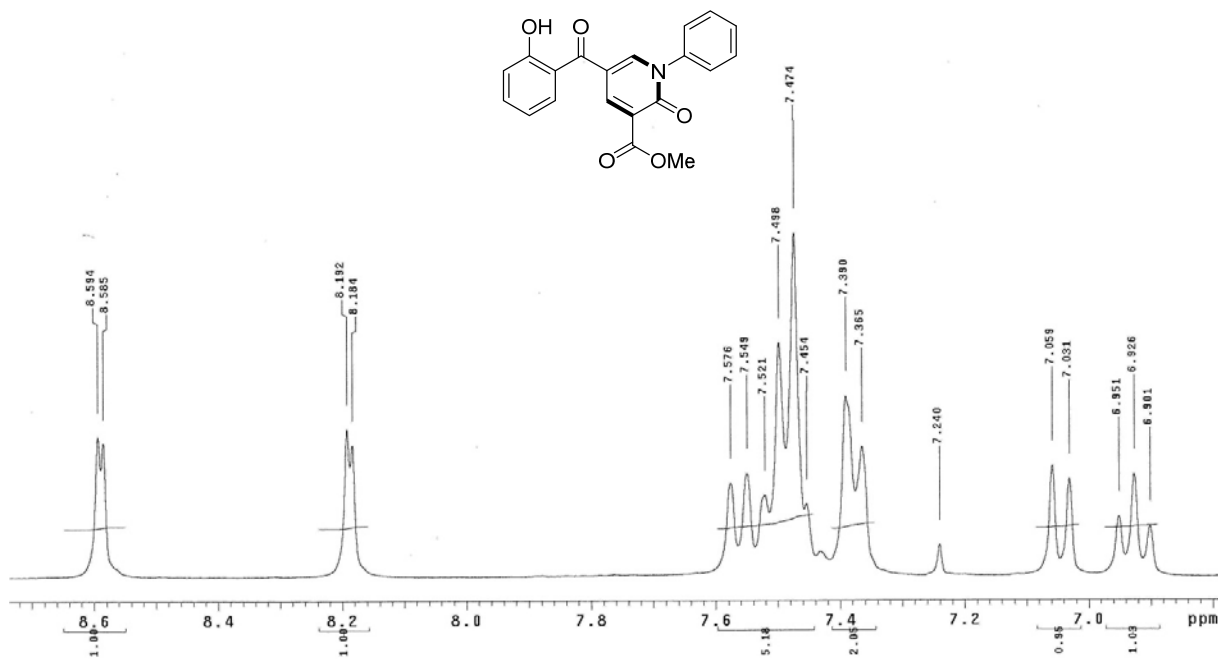

Compound-4a  
<sup>13</sup>C-NMR/CDCl<sub>3</sub>, Expansion

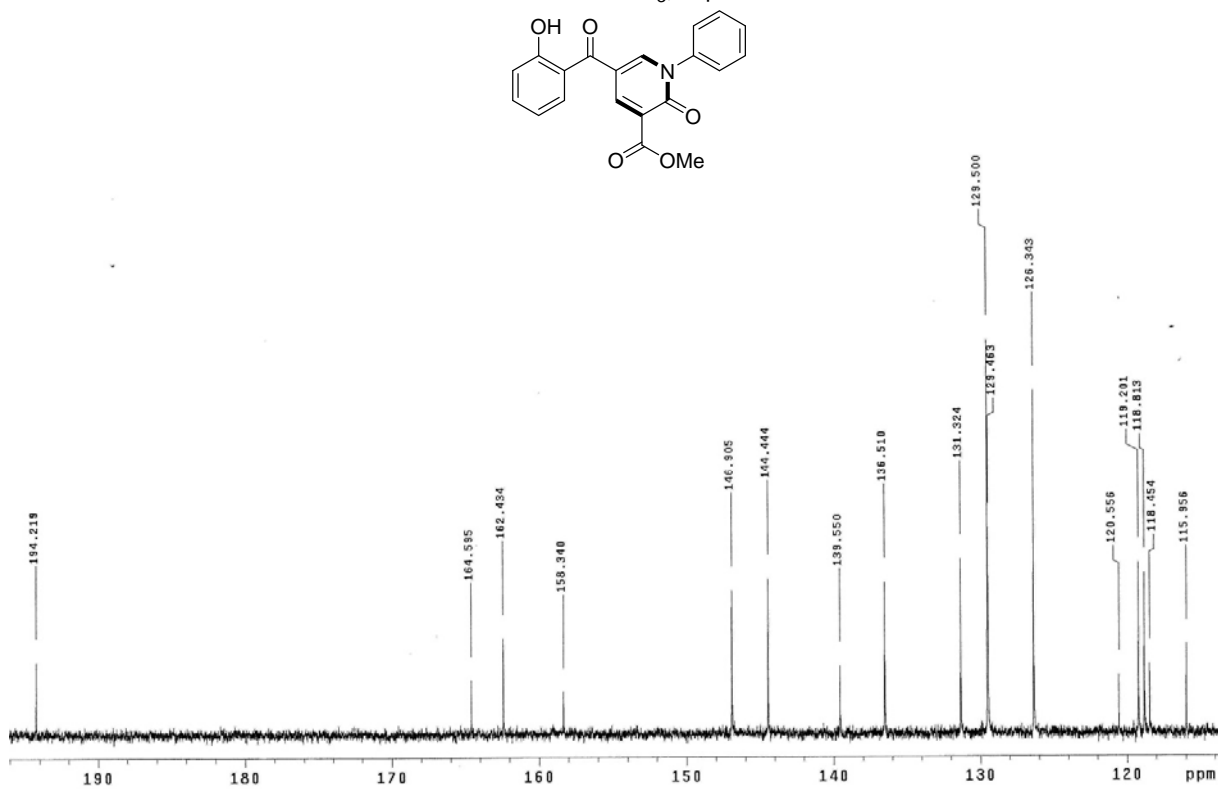



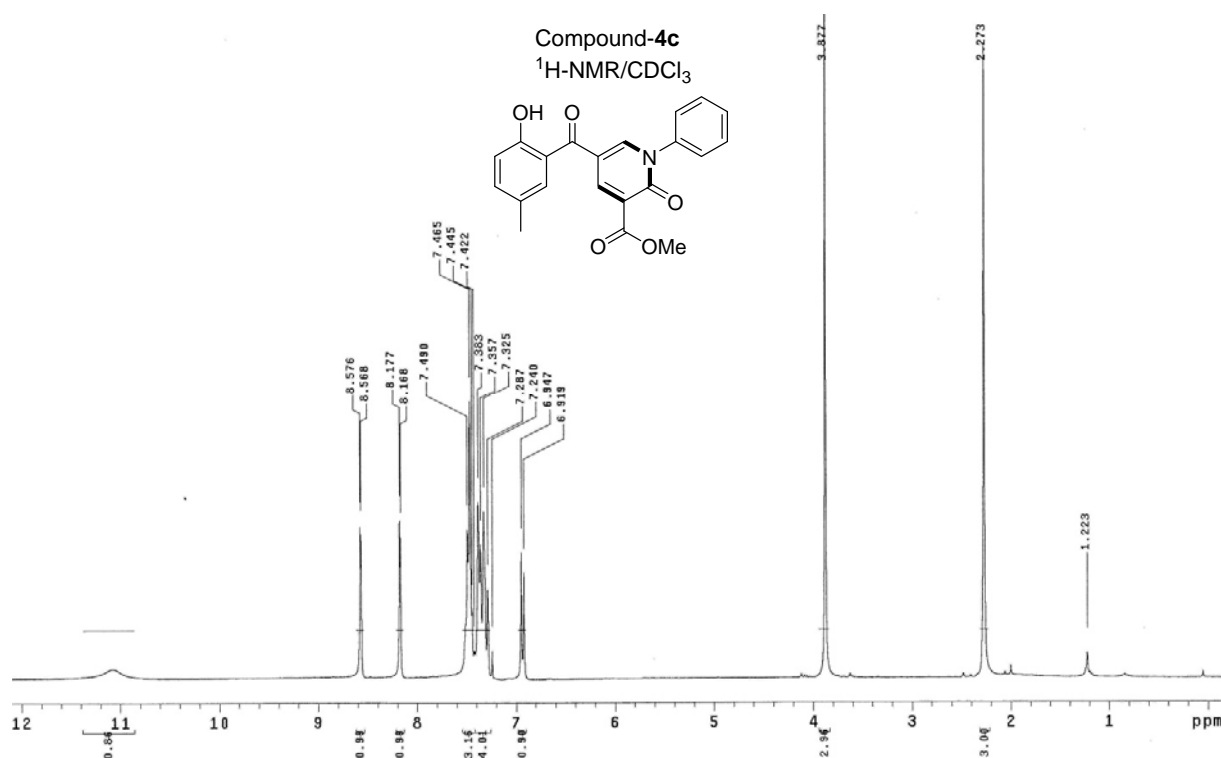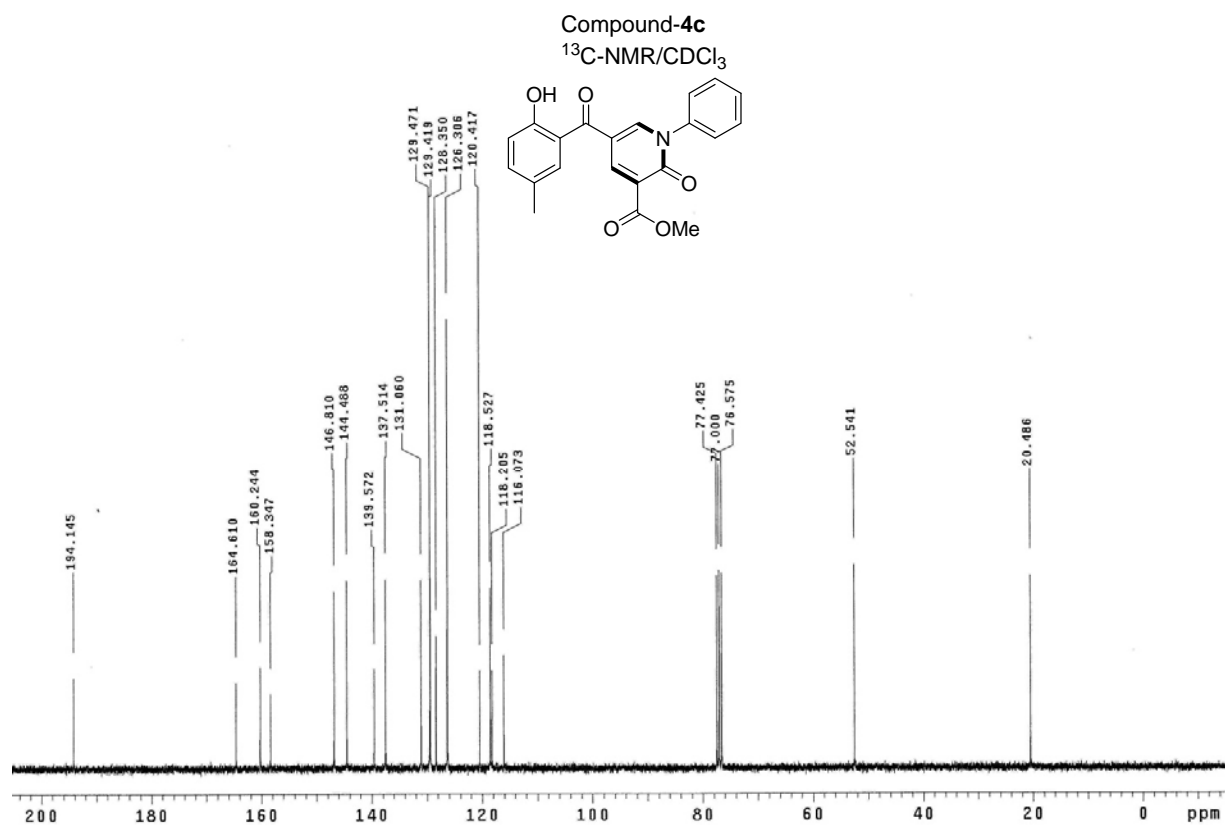

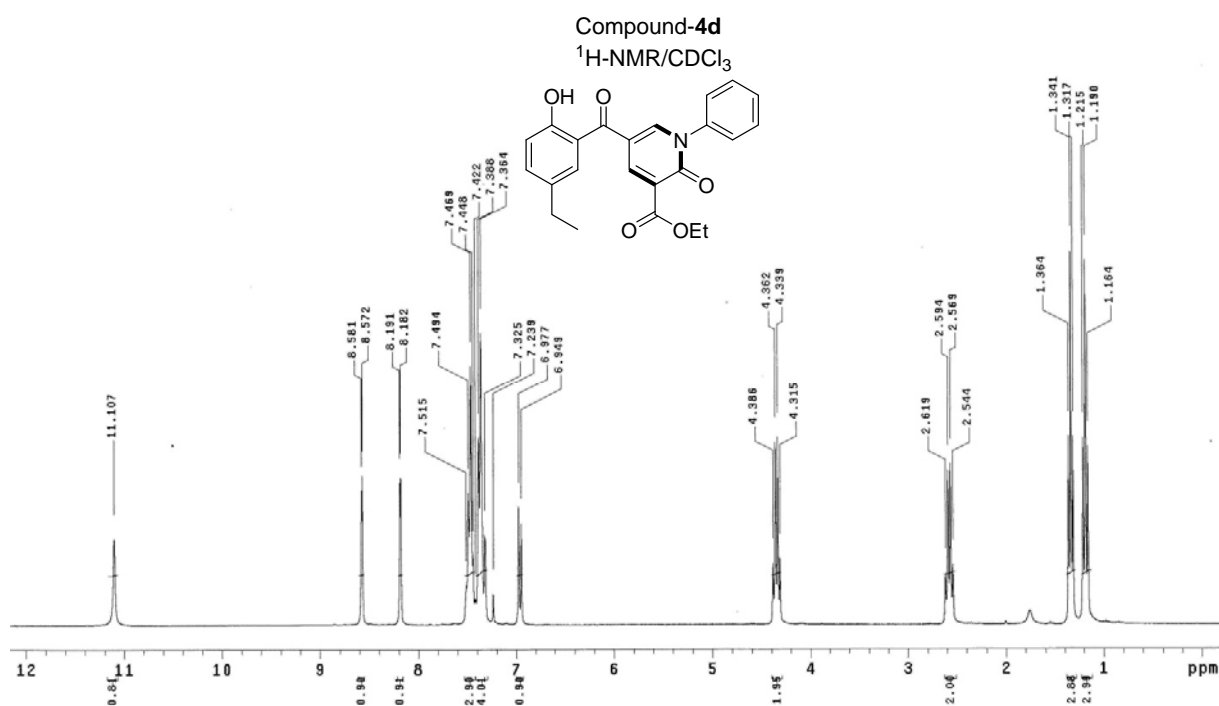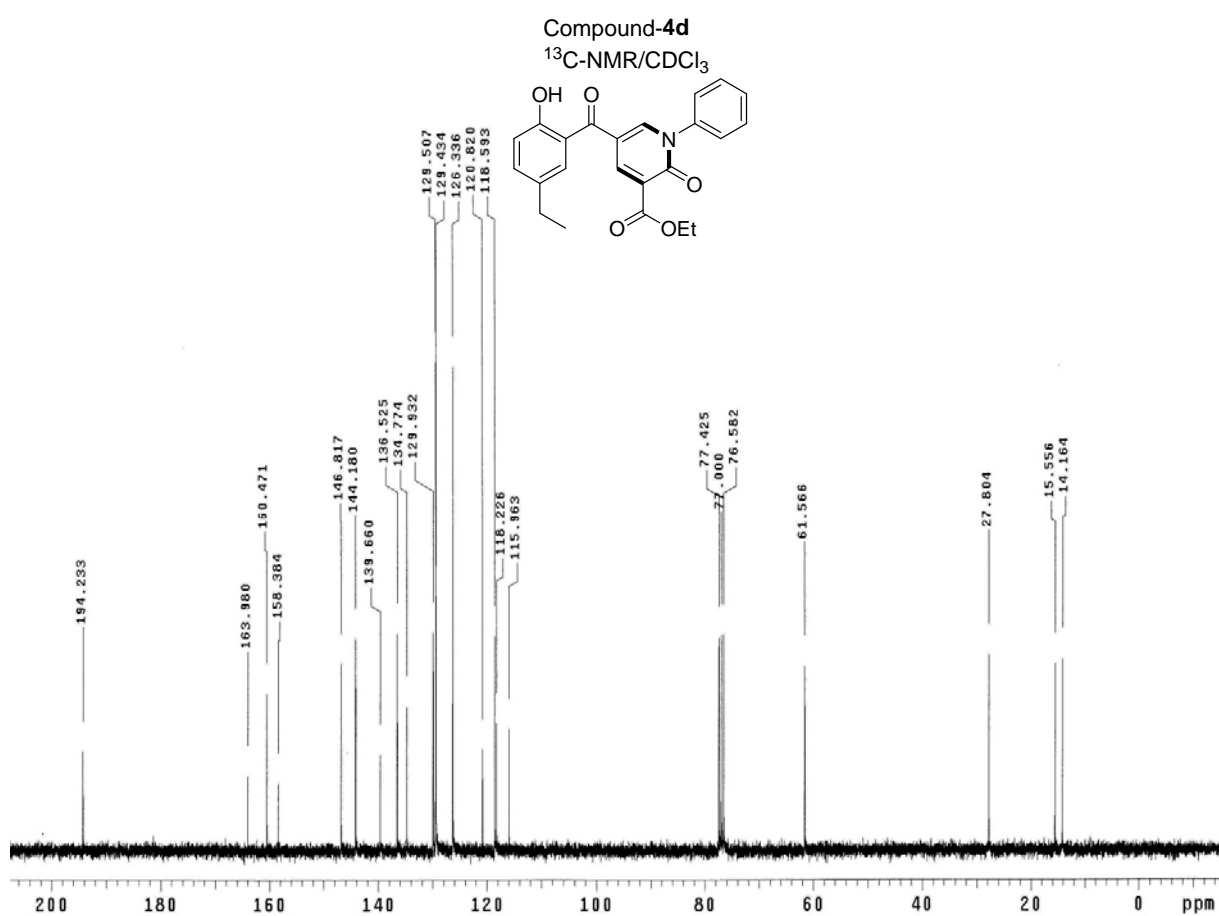

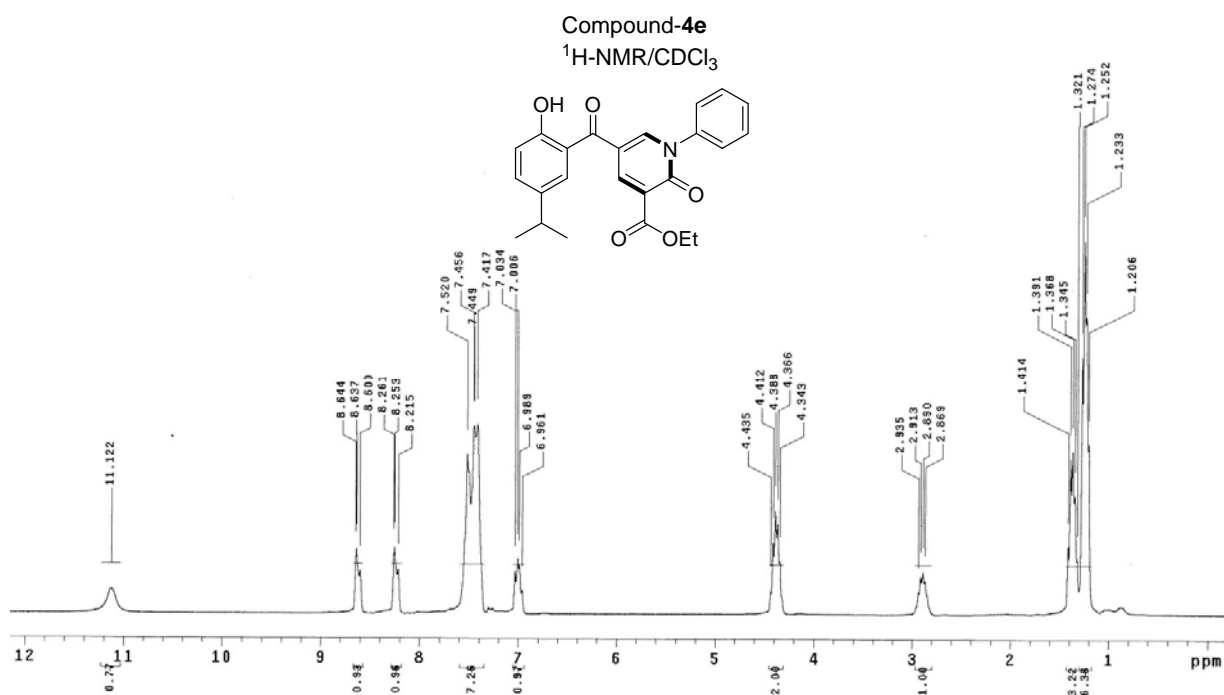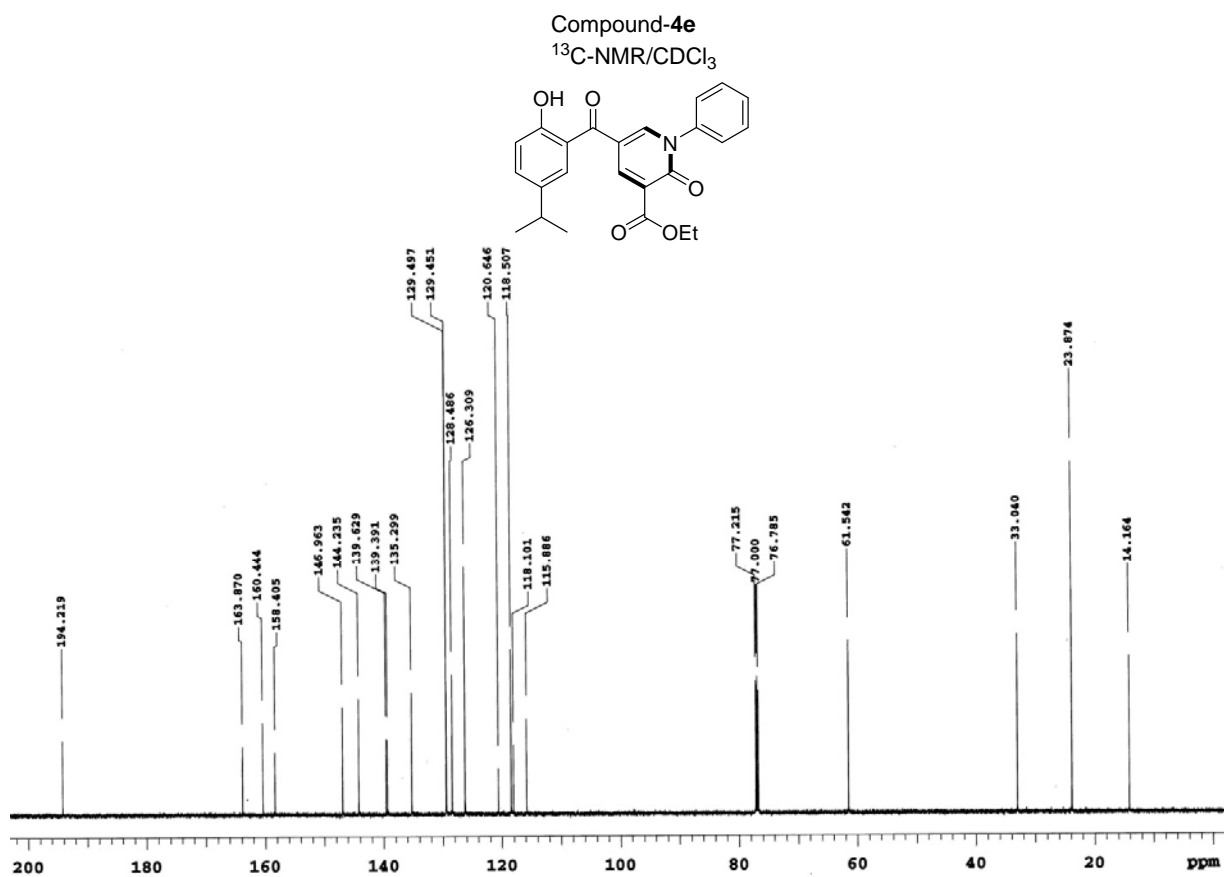

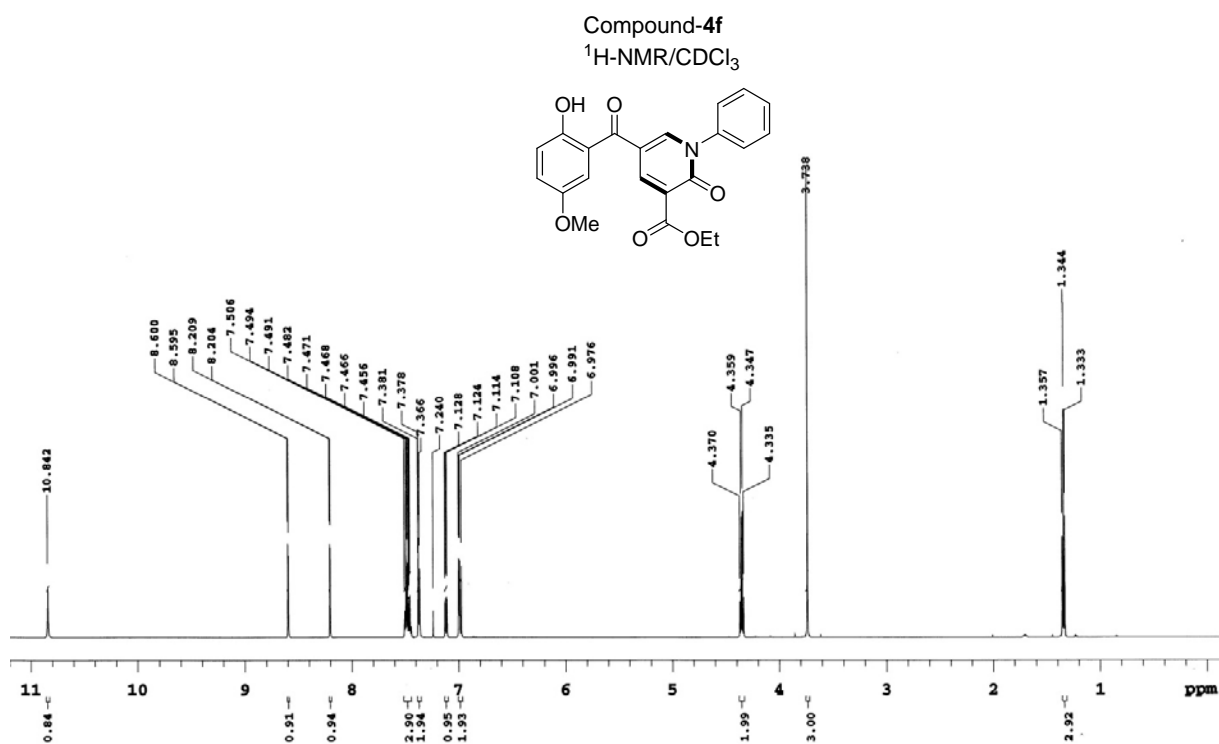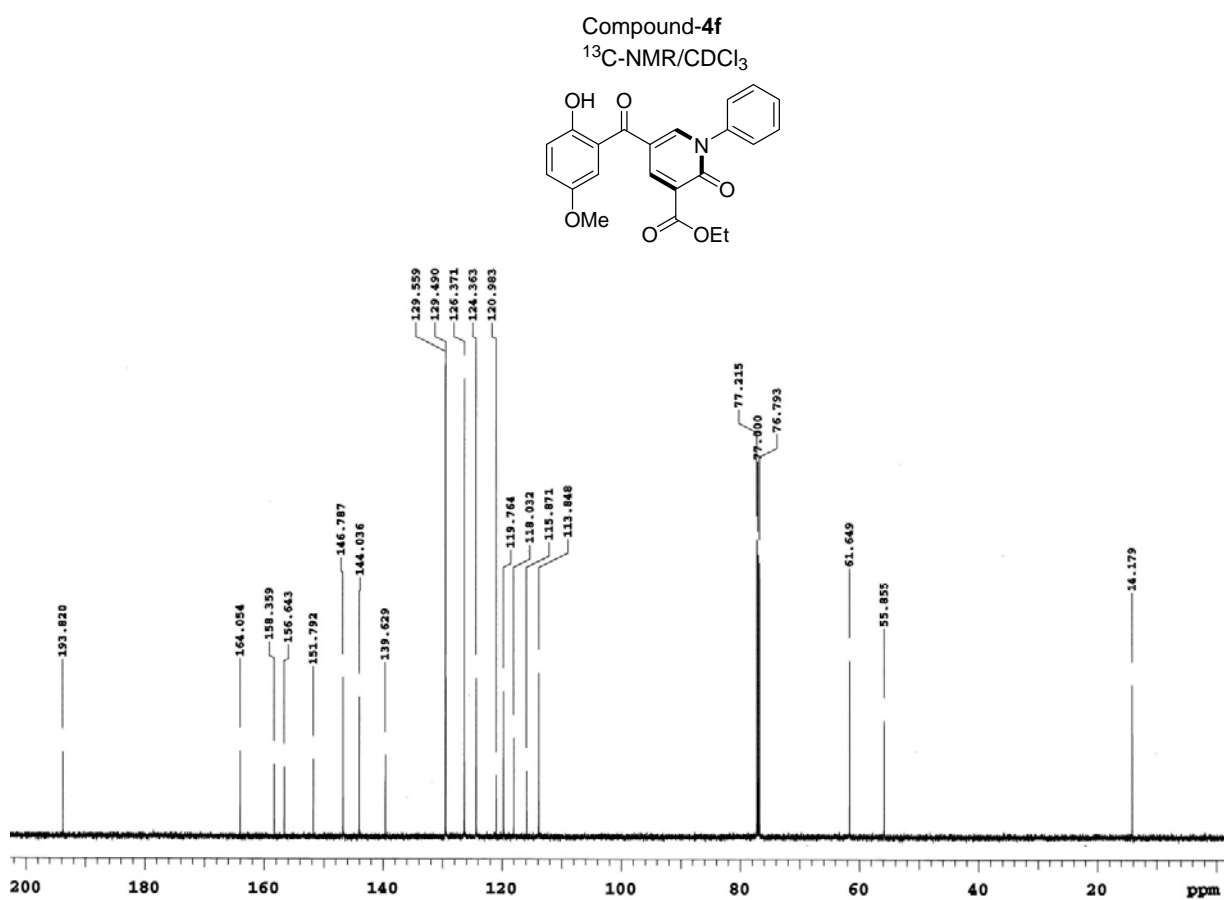

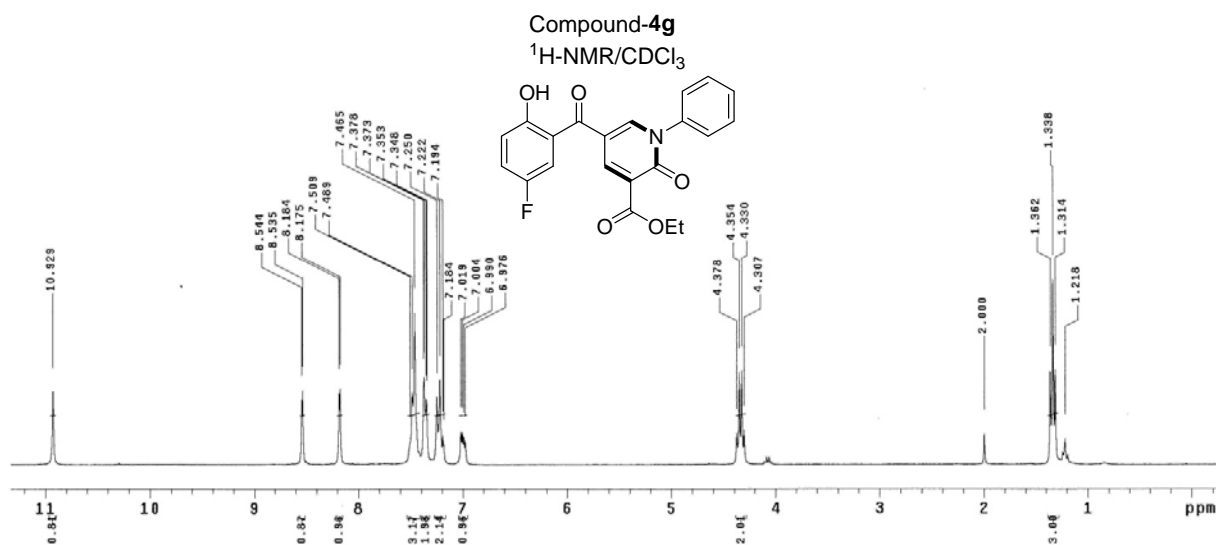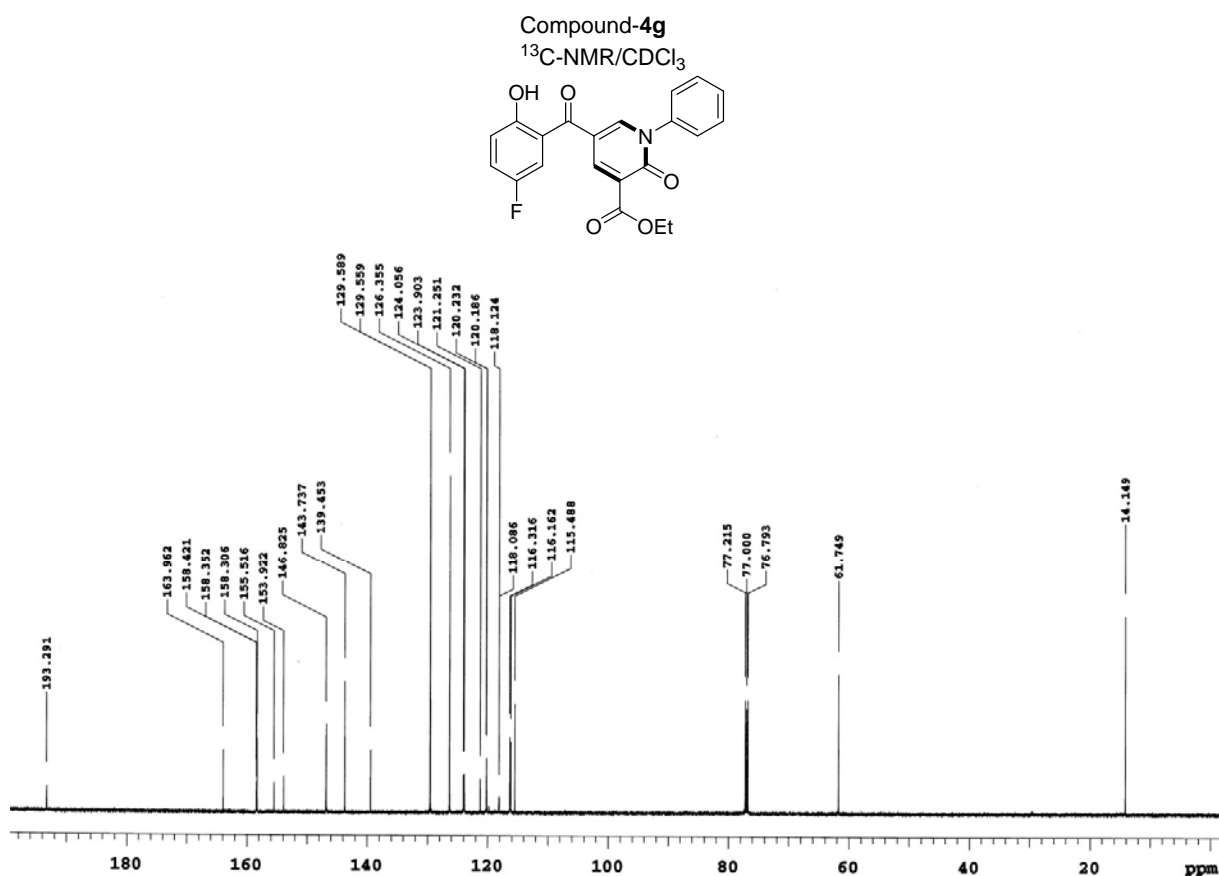

Compound-4g  
<sup>13</sup>C-NMR/CDCl<sub>3</sub>, Expansion

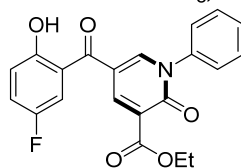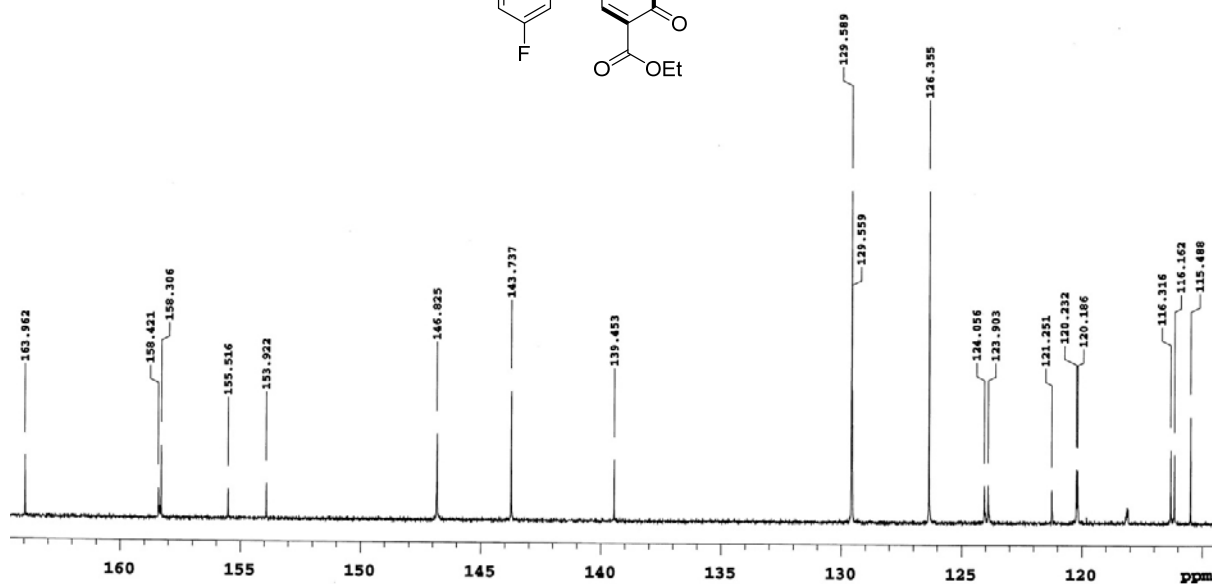

FidFile: FIDORINE

Pulse Sequence: FIDORINE (s2pul)  
 Solvent: cdcl3  
 Data collected on: May 26 2015

Temp. 25.0 C / 298.1 K  
 Operator: vnmr1

Relax. delay 1.000 sec  
 Pulse 30.0 degrees  
 Acq. time 0.996 sec  
 Width 131.6 kHz  
 64 repetitions  
 OBSERVE F19, 564.4292367 MHz  
 DATA PROCESSING  
 FT size 262144  
 Total time 33 min

Compound-4g  
<sup>19</sup>F-NMR/CDCl<sub>3</sub>

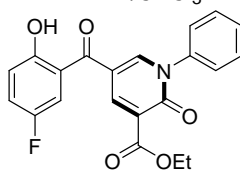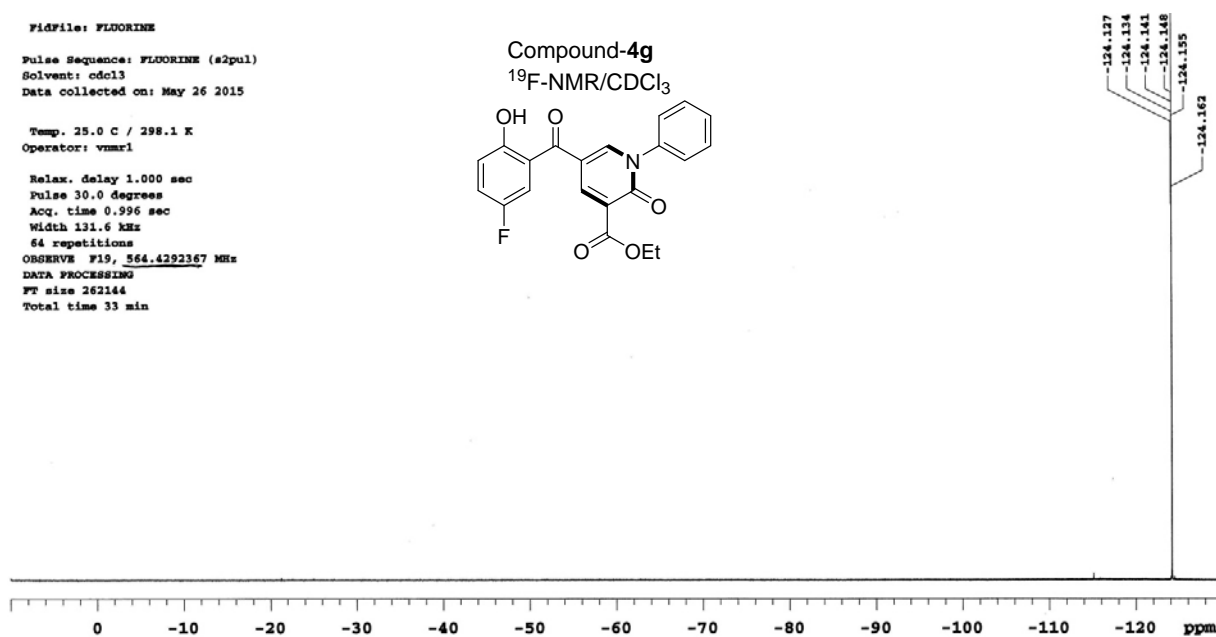

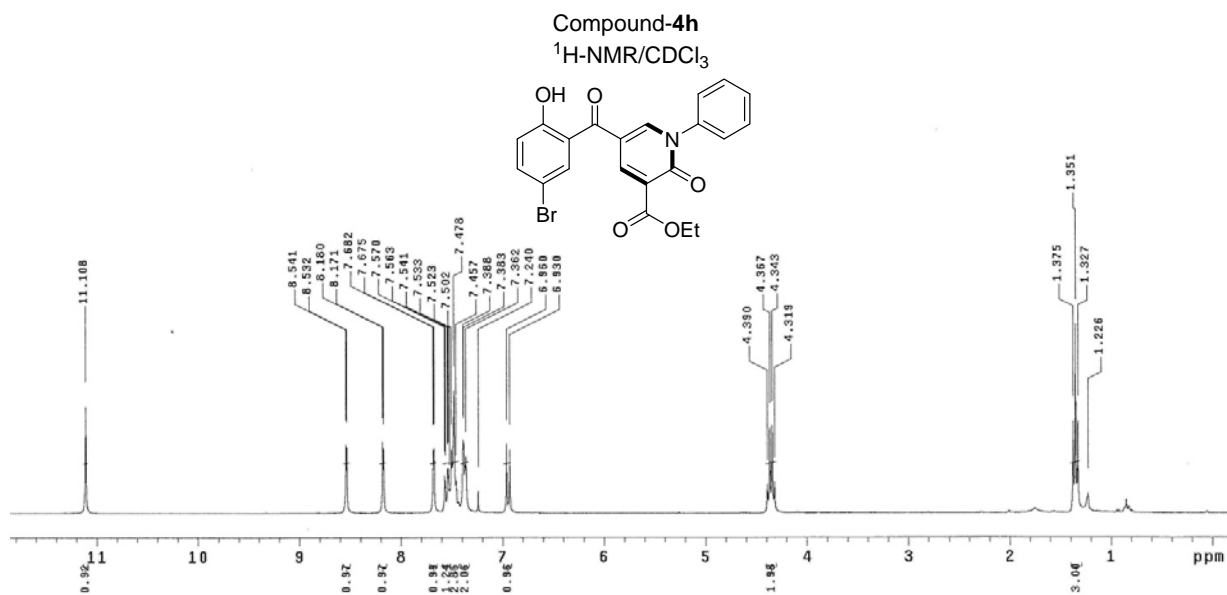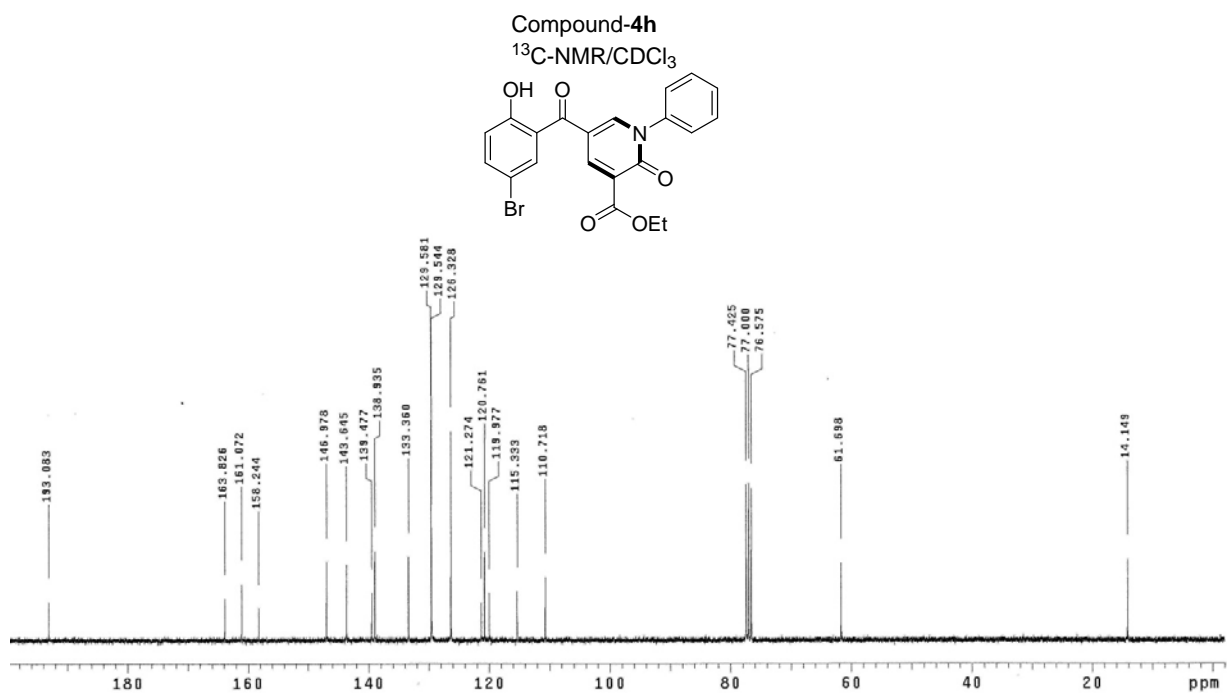

Compound-4h  
<sup>1</sup>H-NMR/CDCI<sub>3</sub>, Expansion

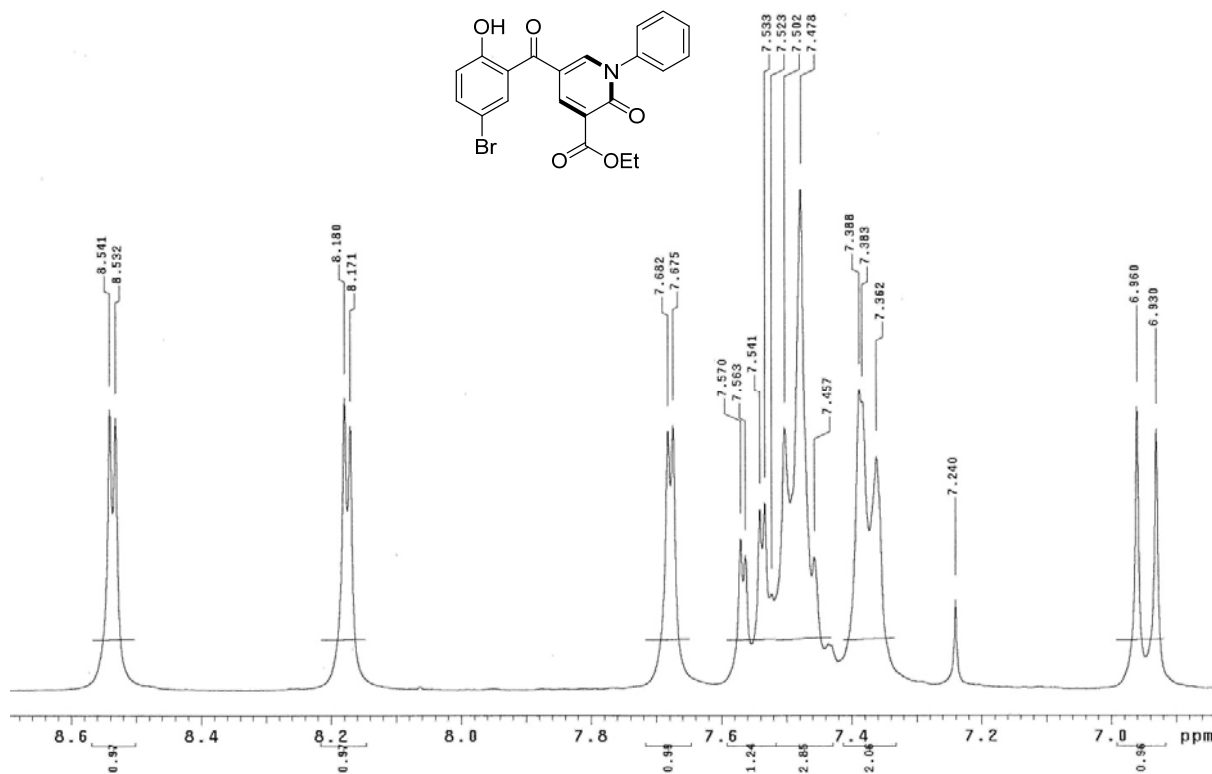

Compound-4h  
<sup>13</sup>C-NMR/CDCI<sub>3</sub>, Expansion

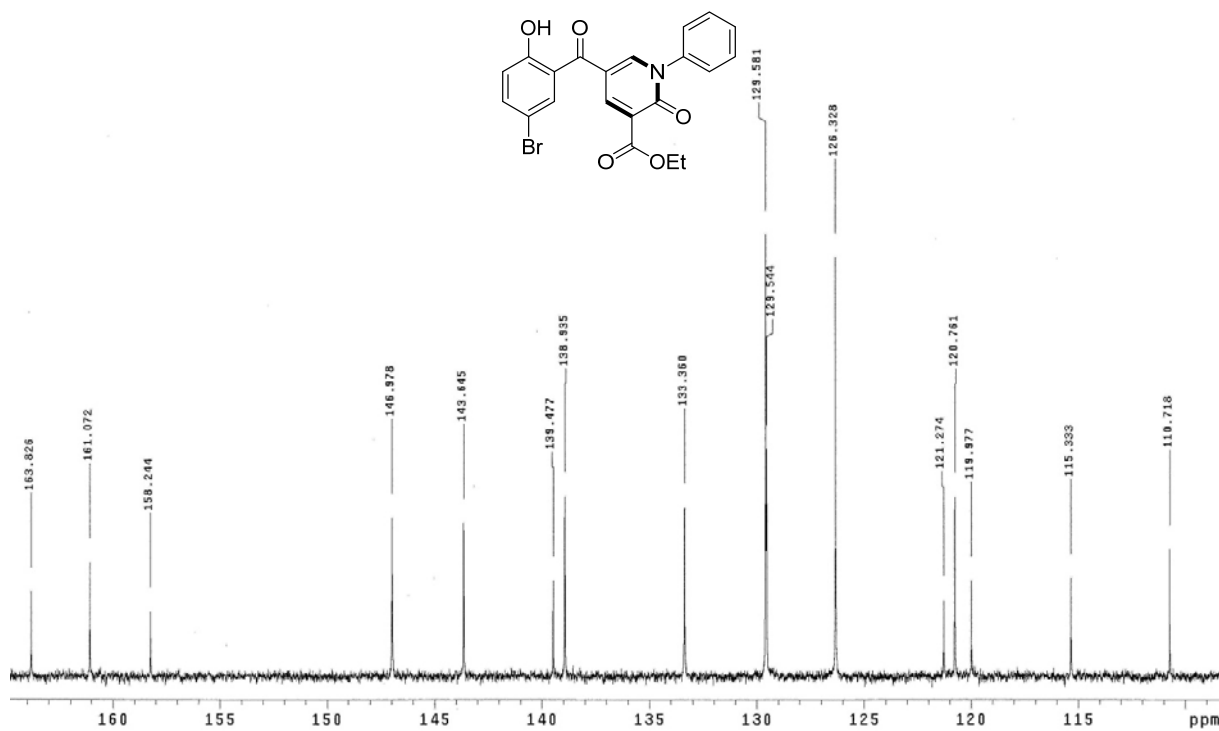

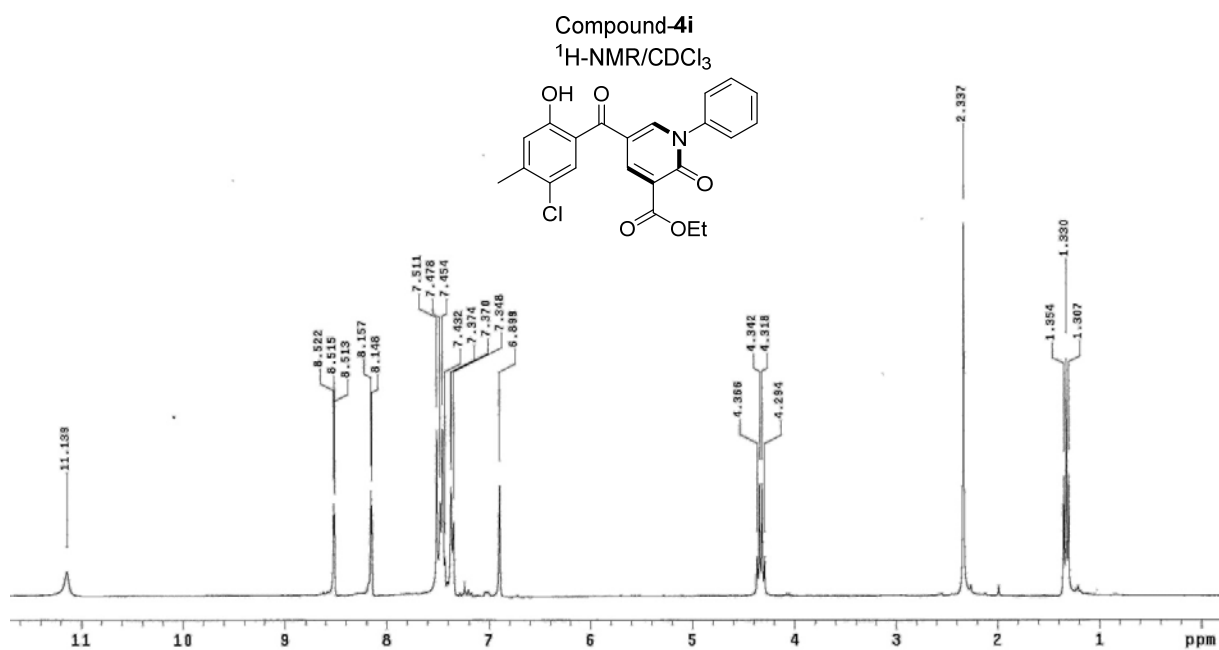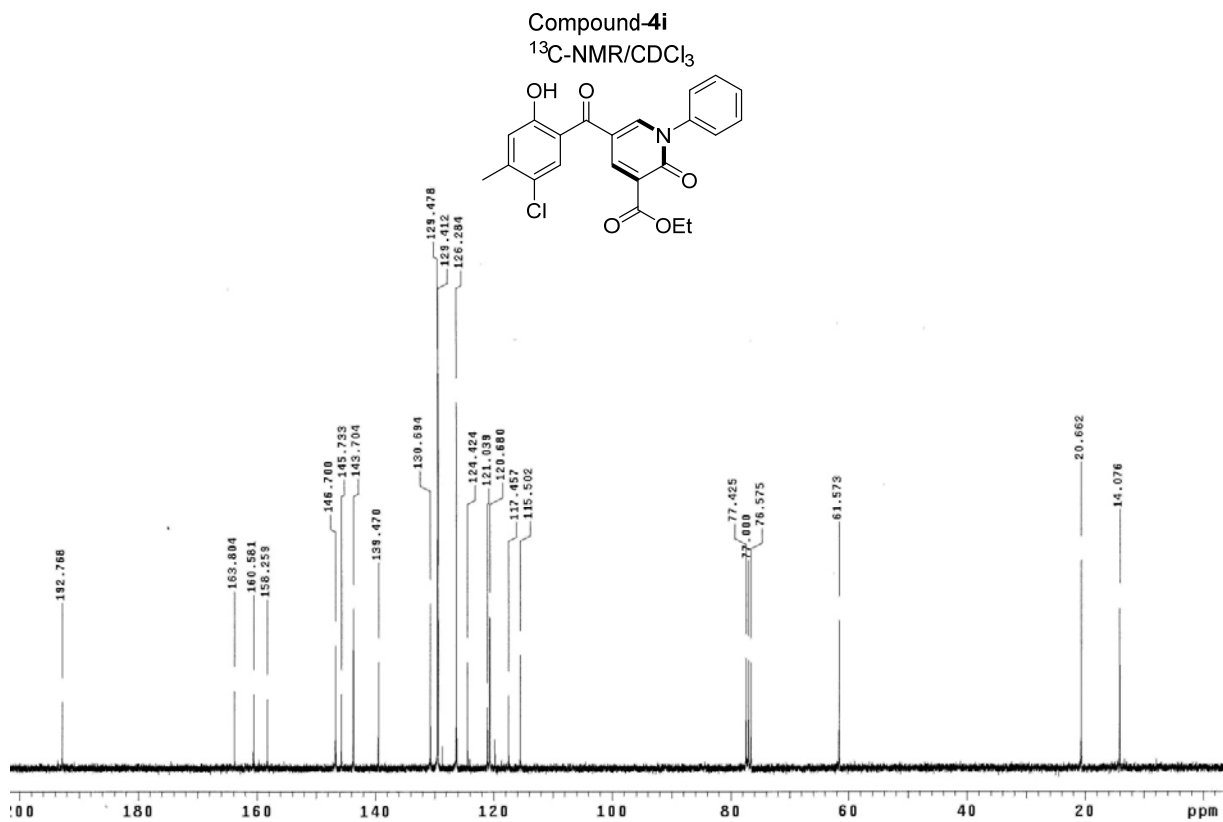

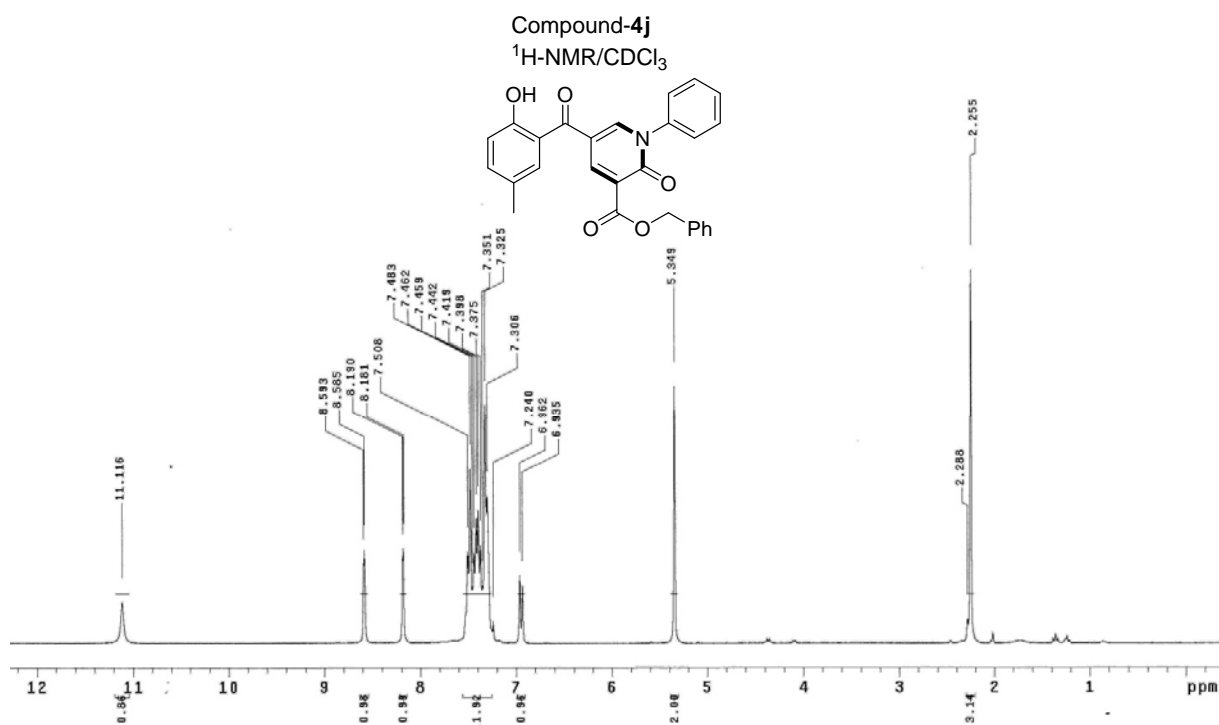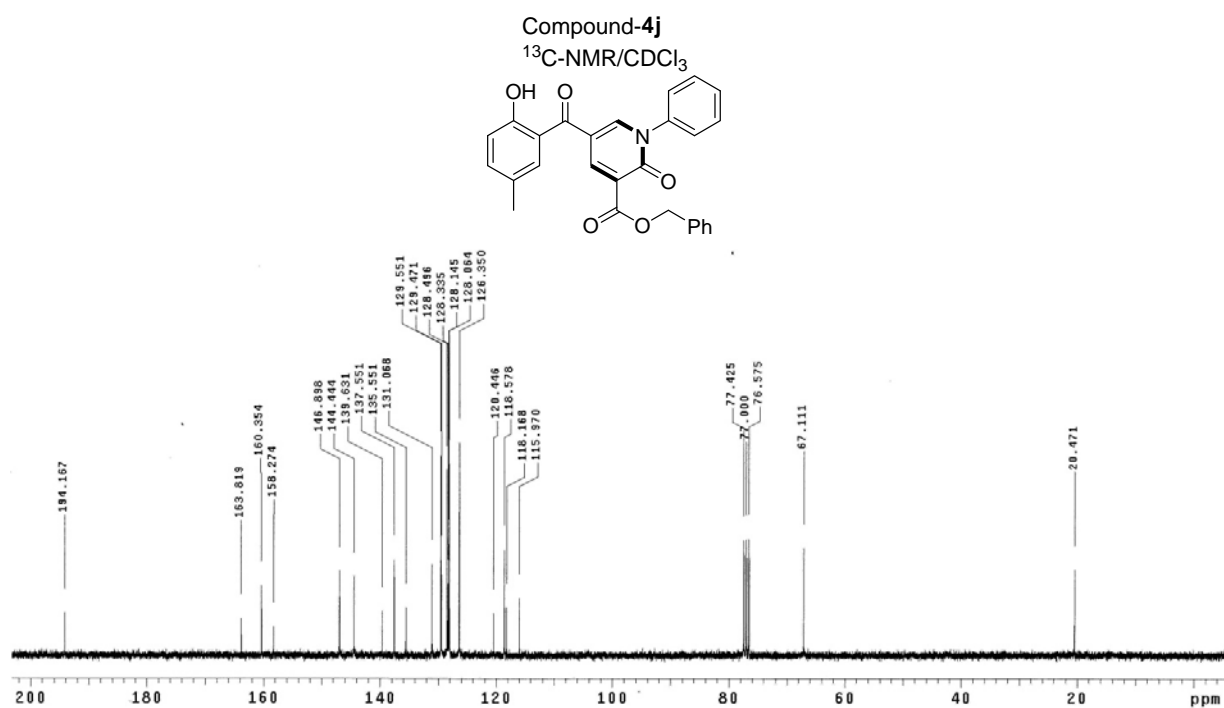

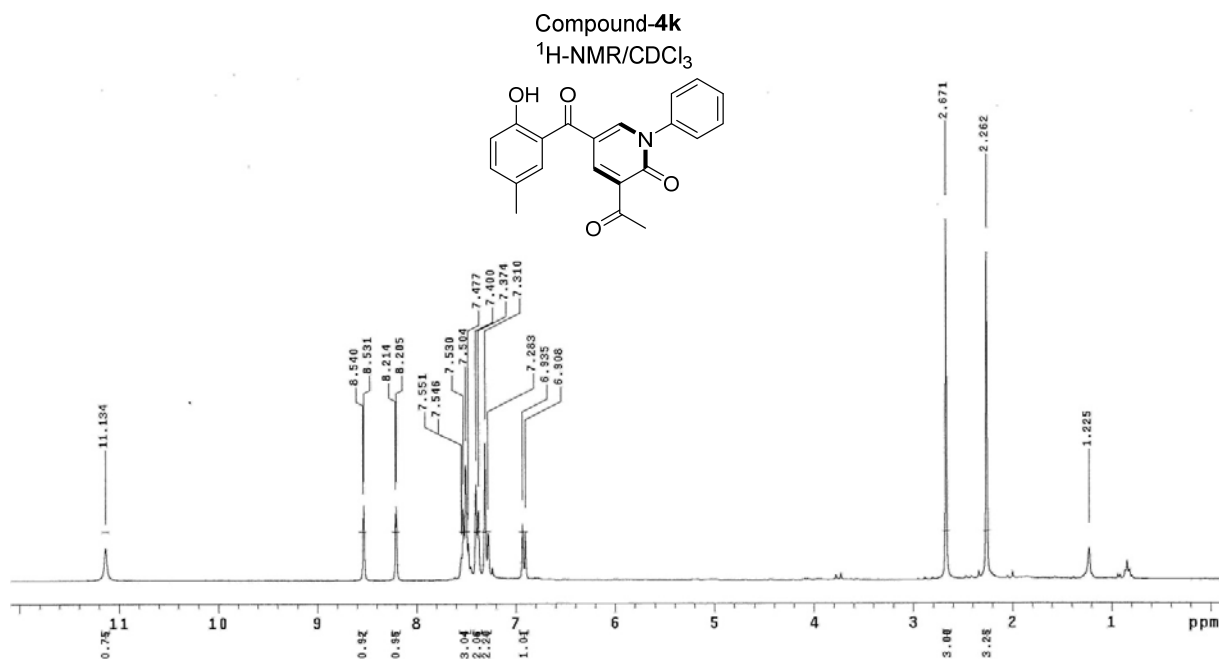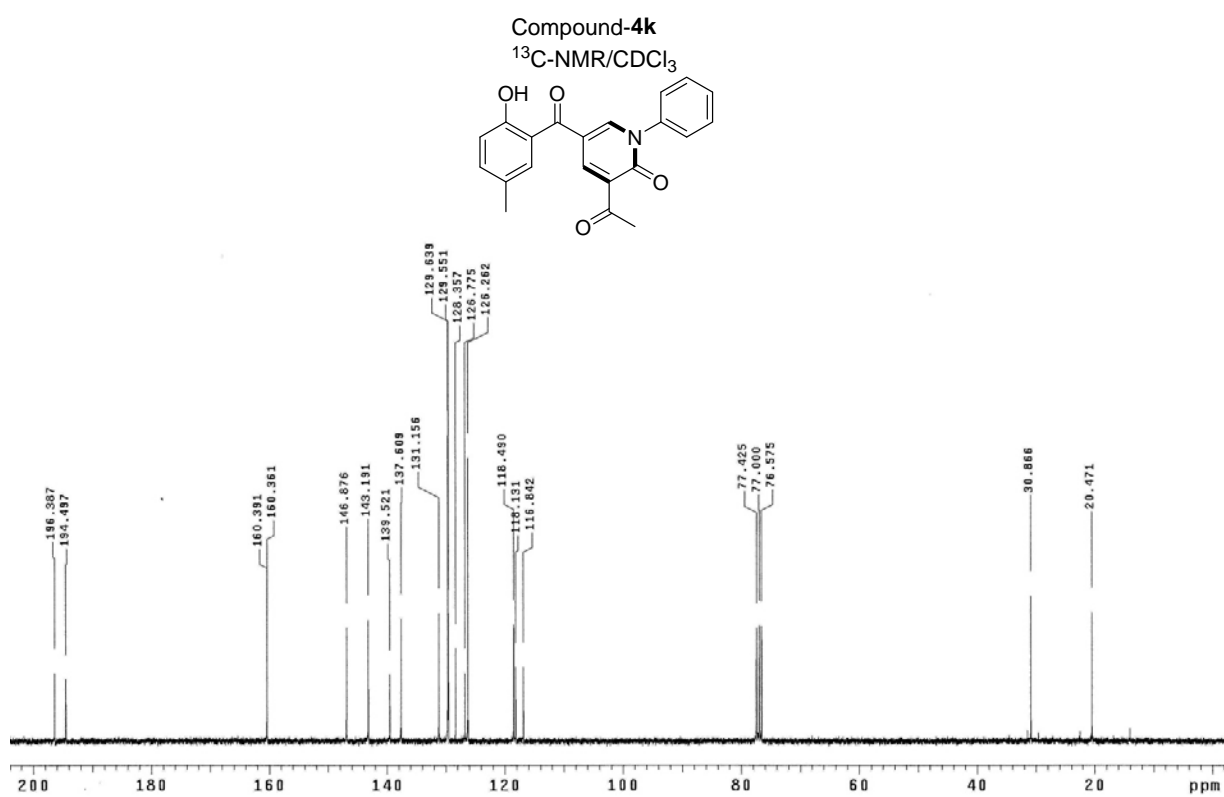

Compound-4k

<sup>1</sup>H-NMR/CDCl<sub>3</sub>, Expansion

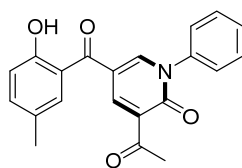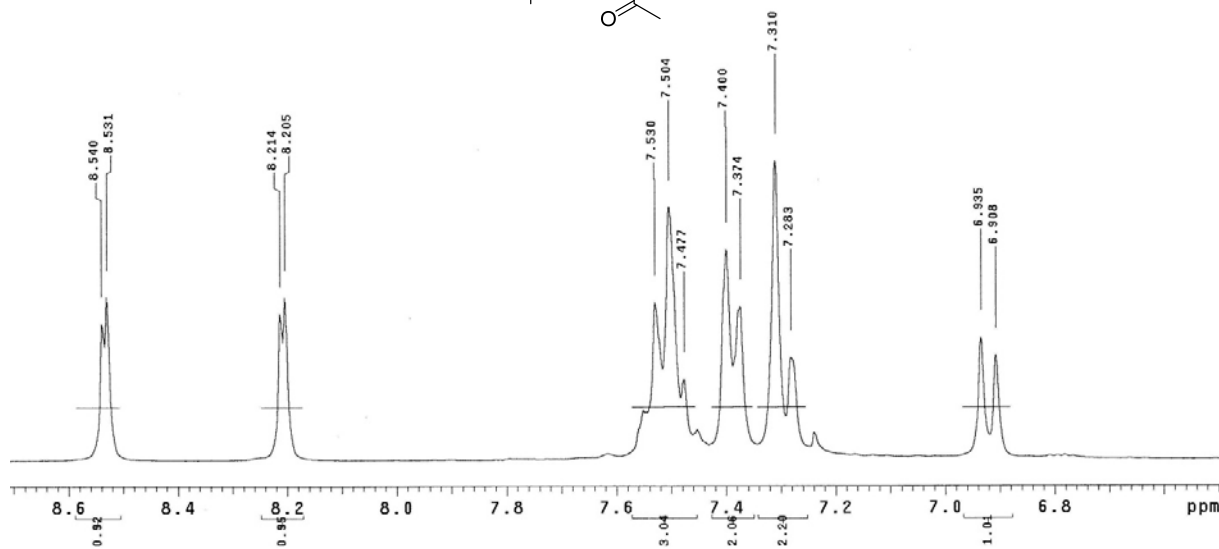

Compound-4k

<sup>13</sup>C-NMR/CDCl<sub>3</sub>, Expansion

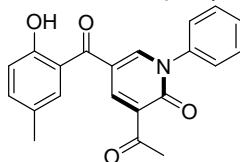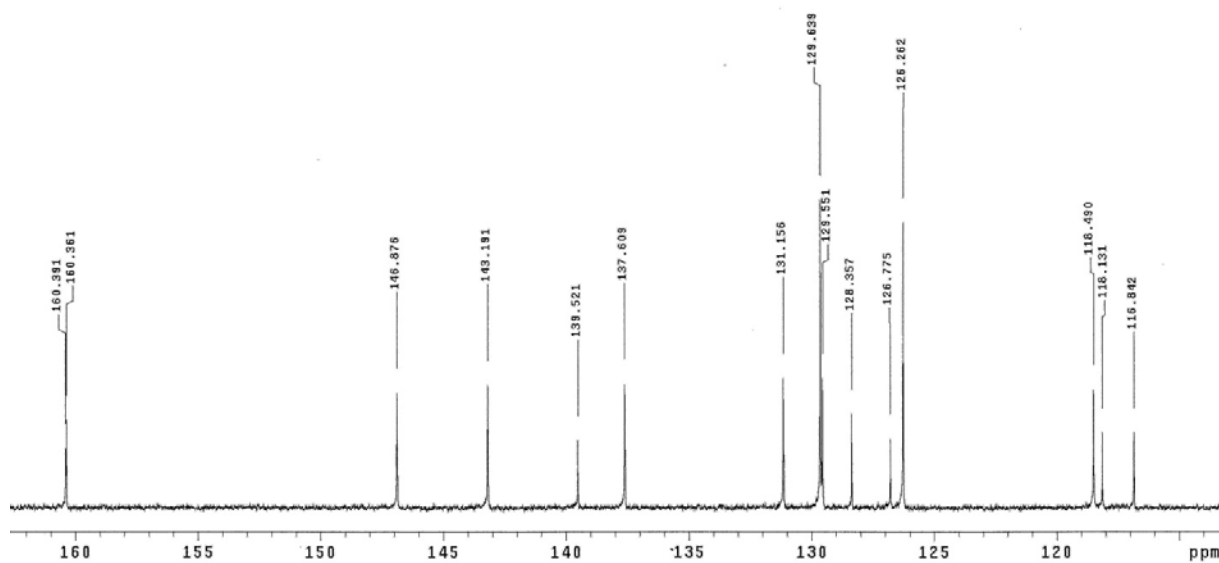

Compound-41  
<sup>1</sup>H-NMR/CDCl<sub>3</sub>

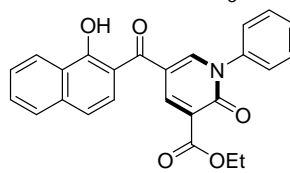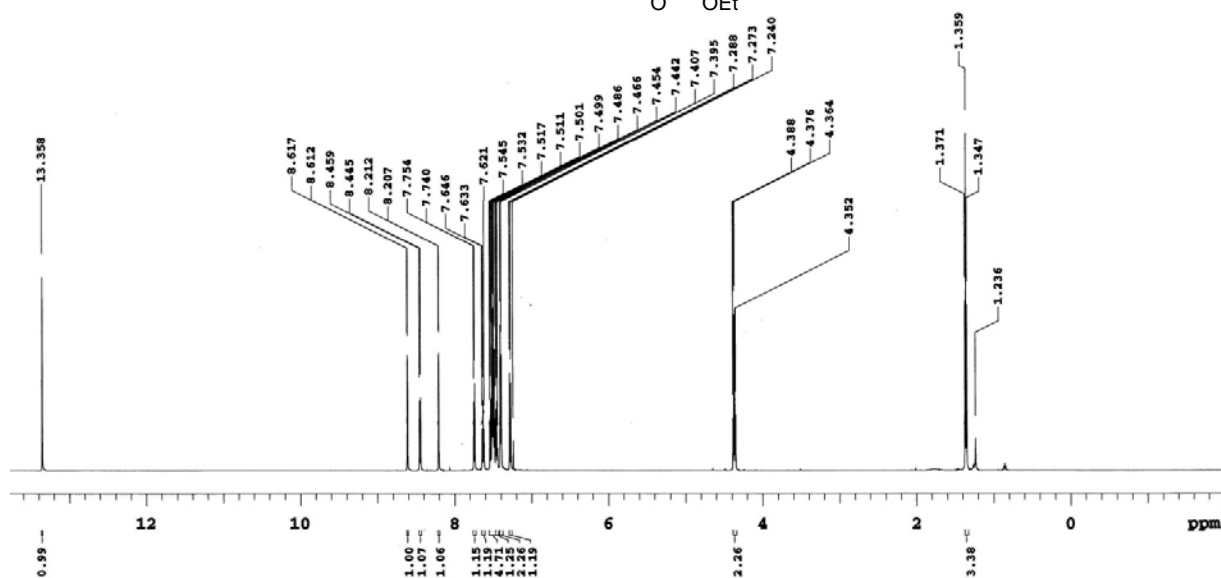

Compound-41  
<sup>13</sup>C-NMR/CDCl<sub>3</sub>

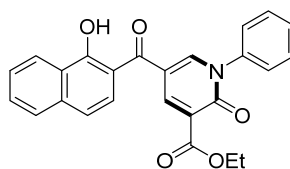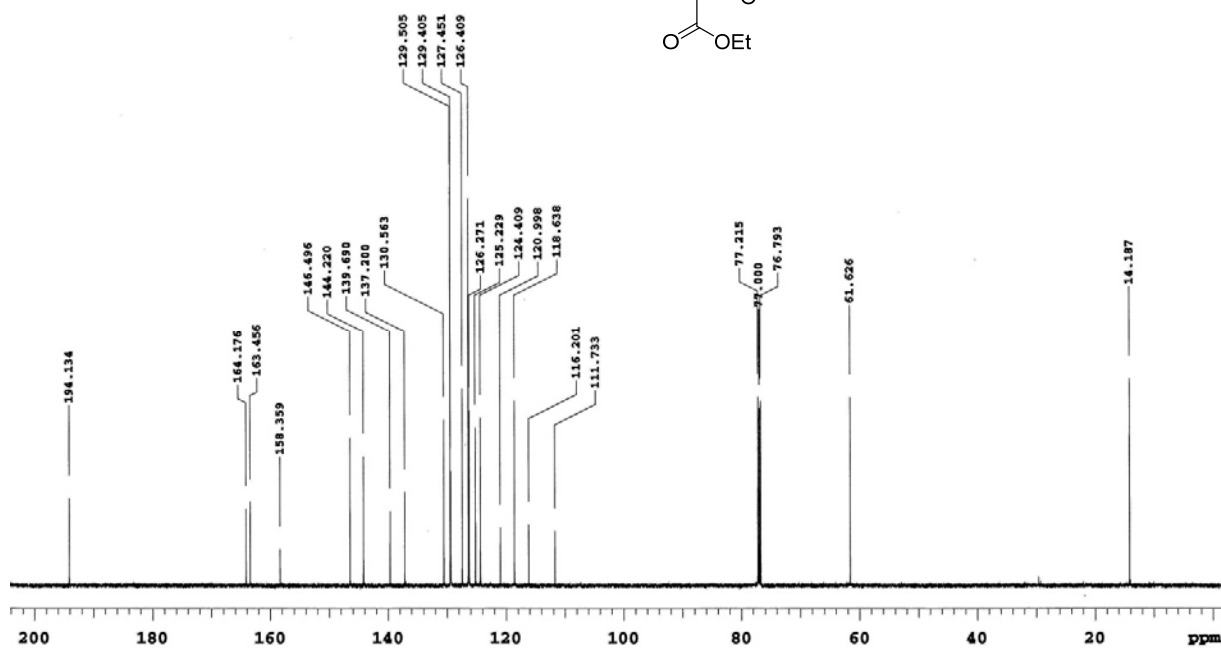

Compound-4I  
<sup>1</sup>H-NMR/CDCl<sub>3</sub>, Expansion

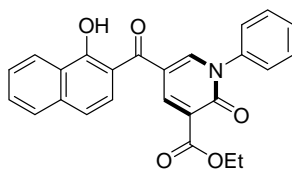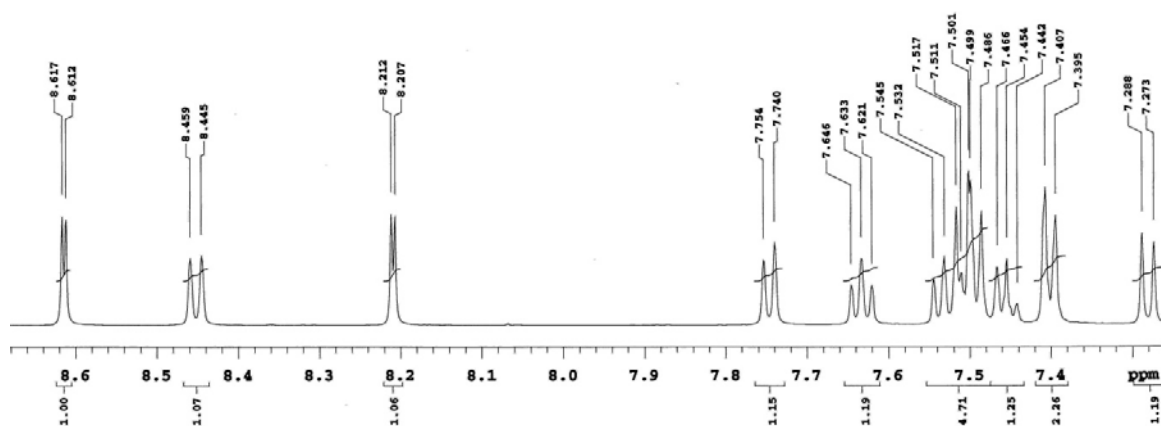

Compound-4I  
<sup>13</sup>C-NMR/CDCl<sub>3</sub>, Expansion

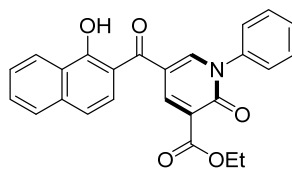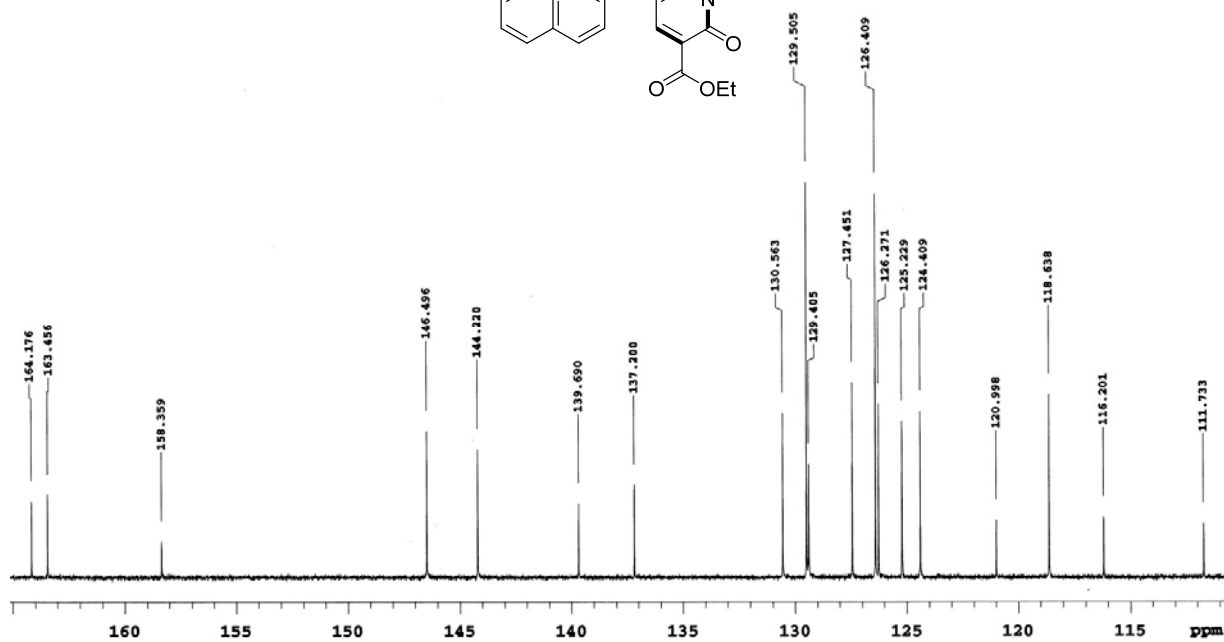



Compound-4m

<sup>1</sup>H-NMR/CDCl<sub>3</sub>, Expansion

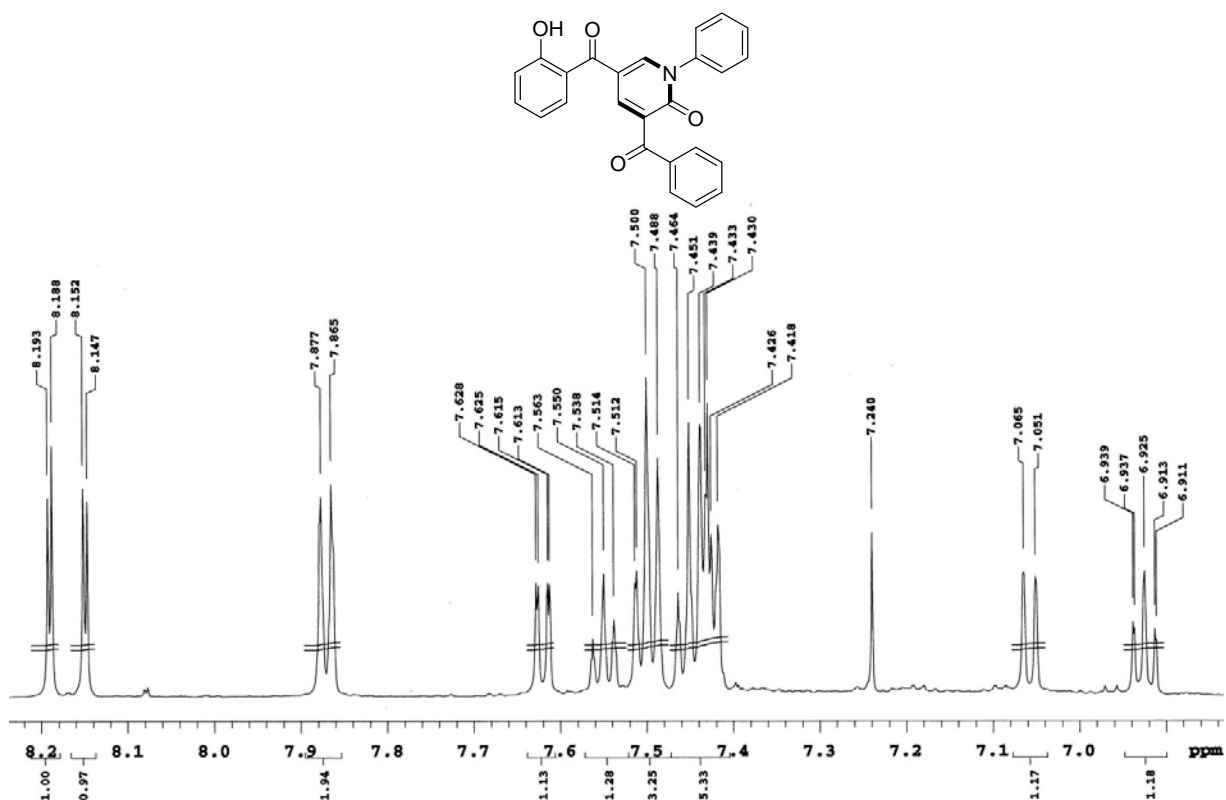

Compound-4m

<sup>13</sup>C-NMR/CDCl<sub>3</sub>, Expansion

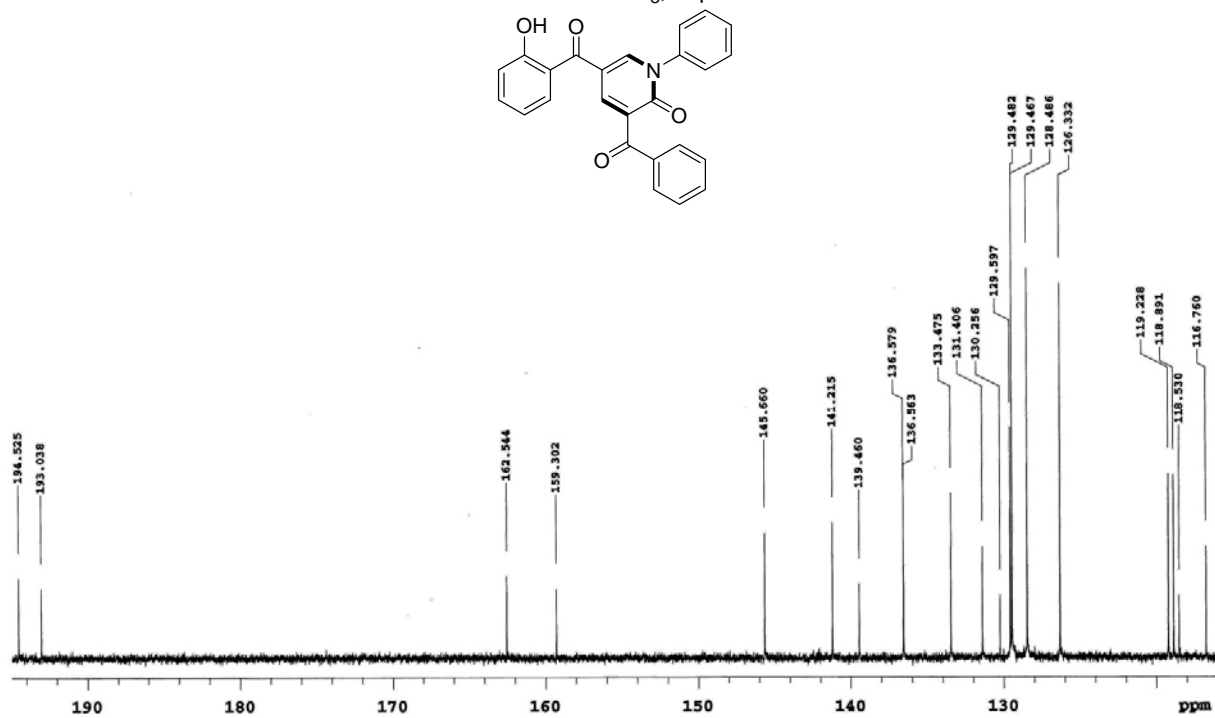

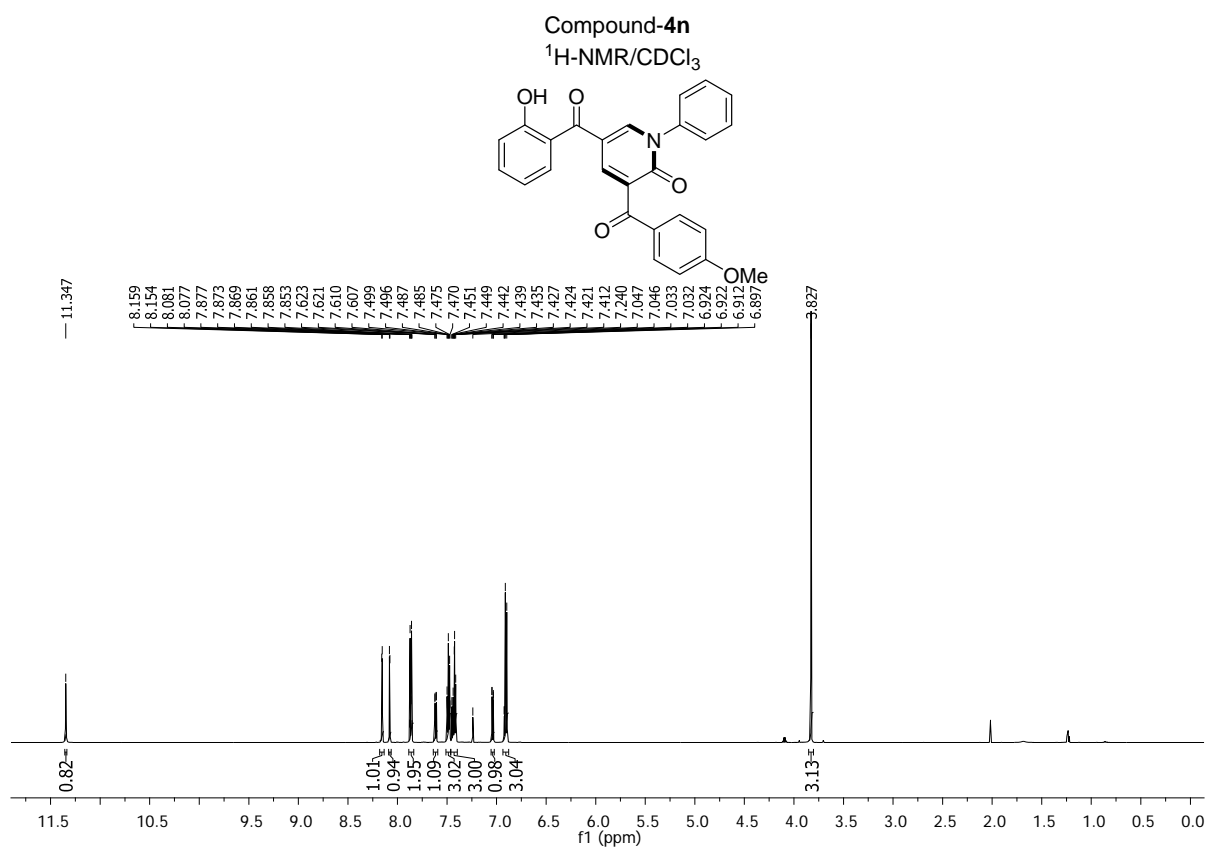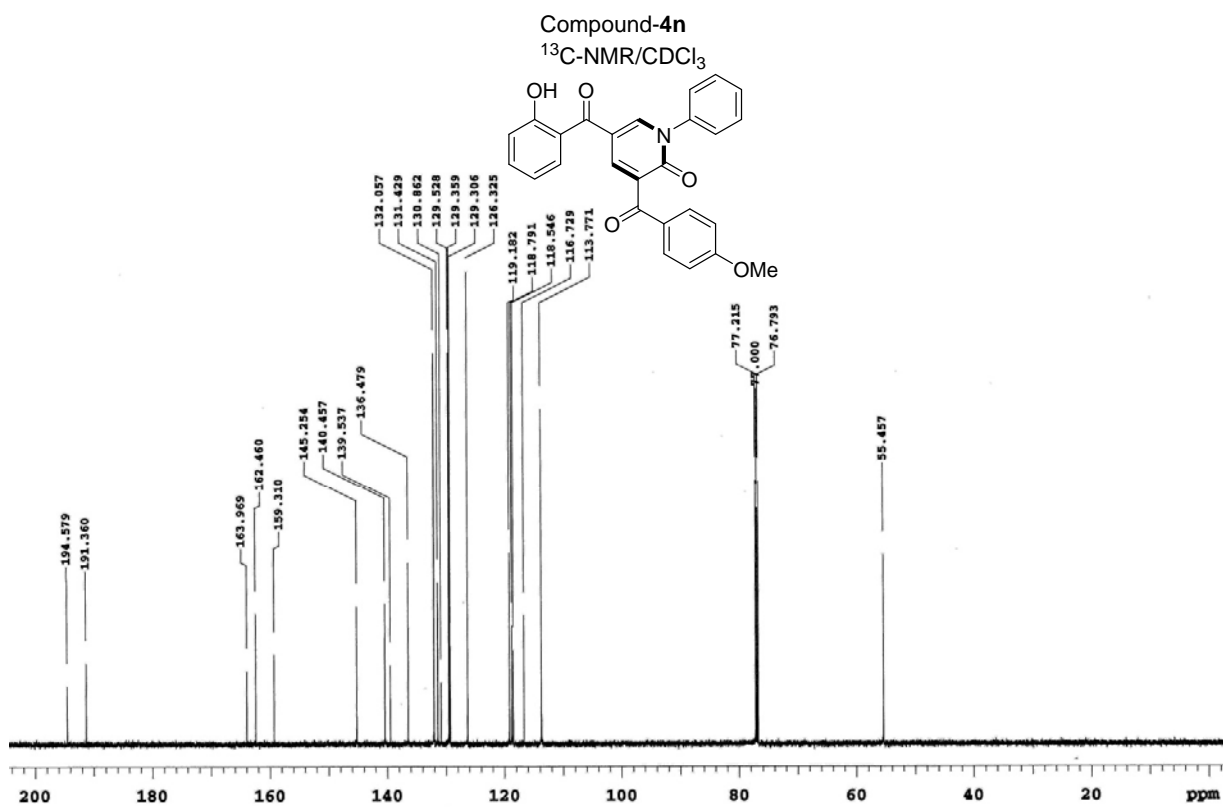

Compound-4n

$^1\text{H-NMR}/\text{CDCl}_3$ , Expansion

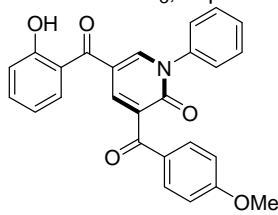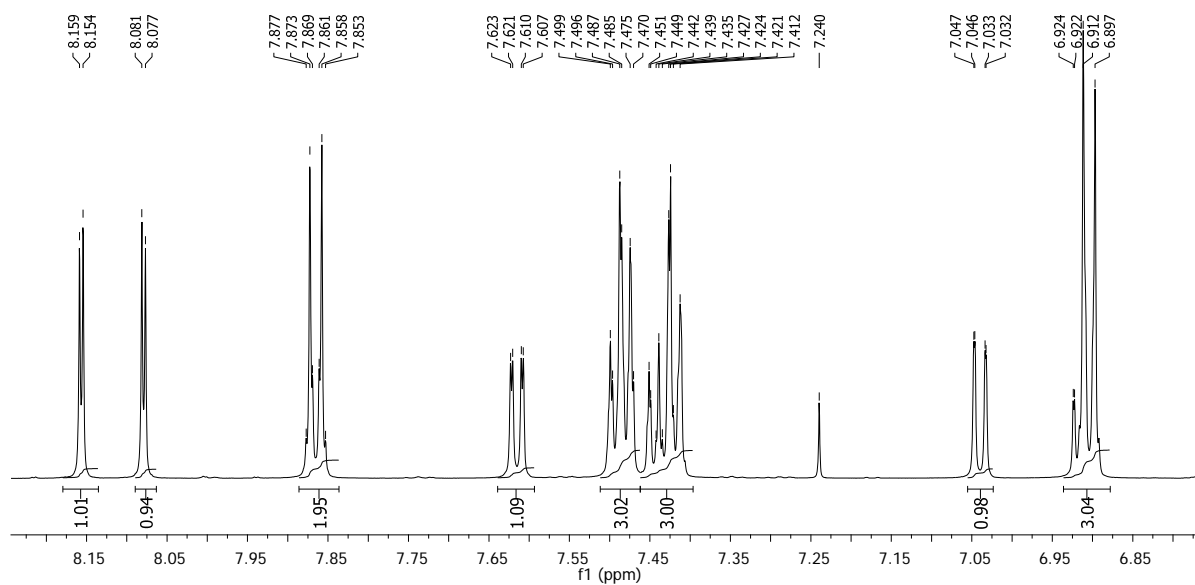

Compound-4n

$^{13}\text{C-NMR}/\text{CDCl}_3$ , Expansion

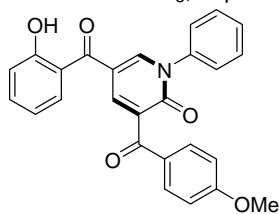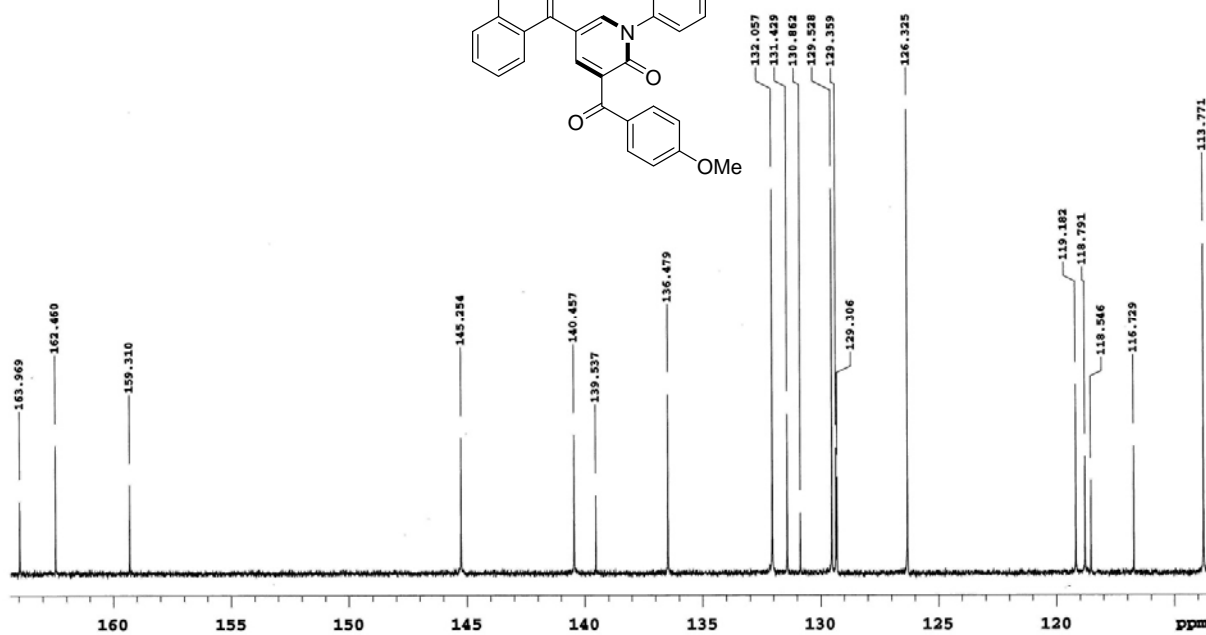

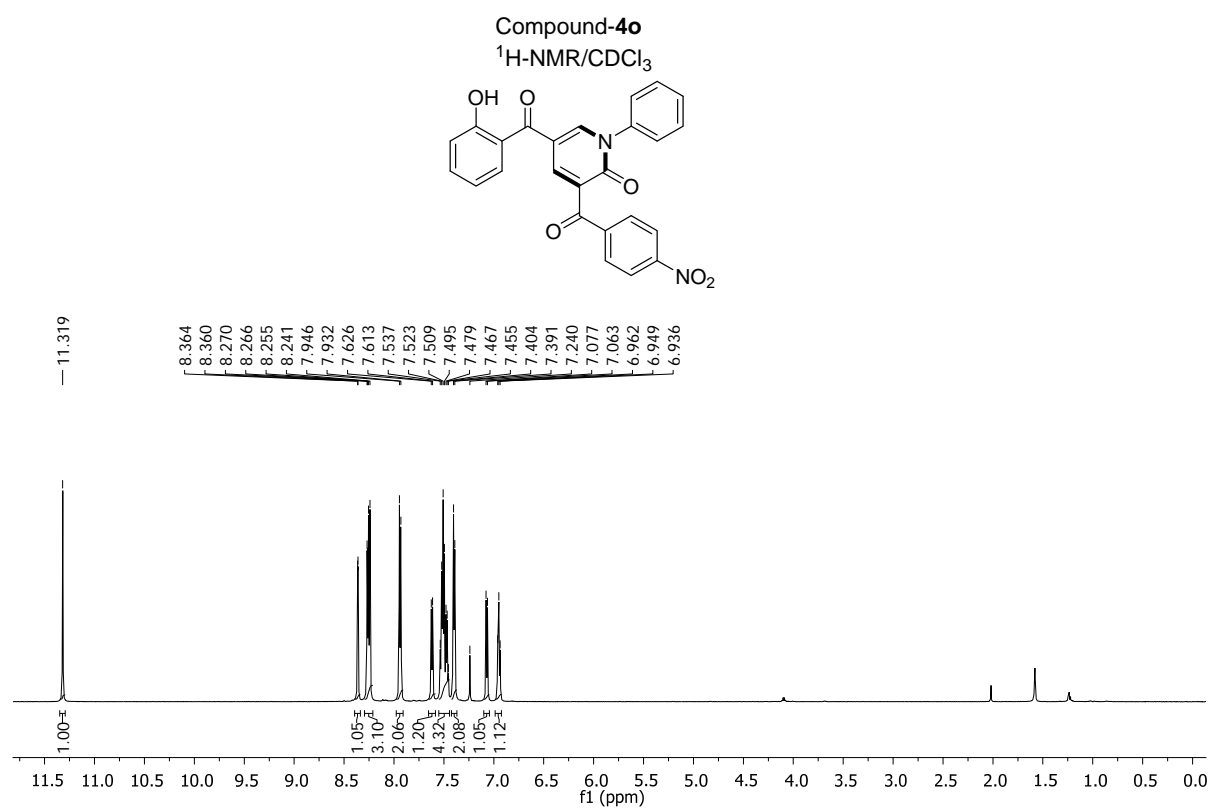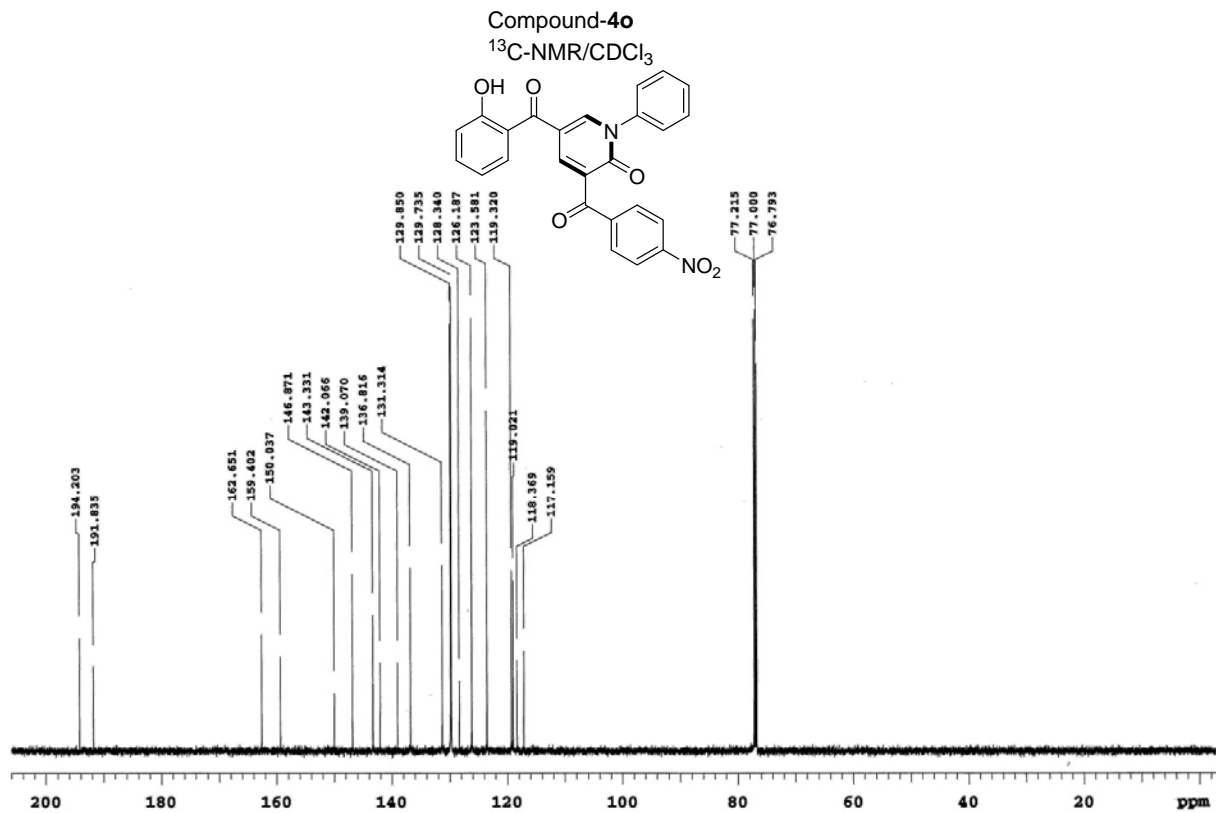

Compound-4o  
<sup>1</sup>H-NMR/CDCl<sub>3</sub>, Expansion

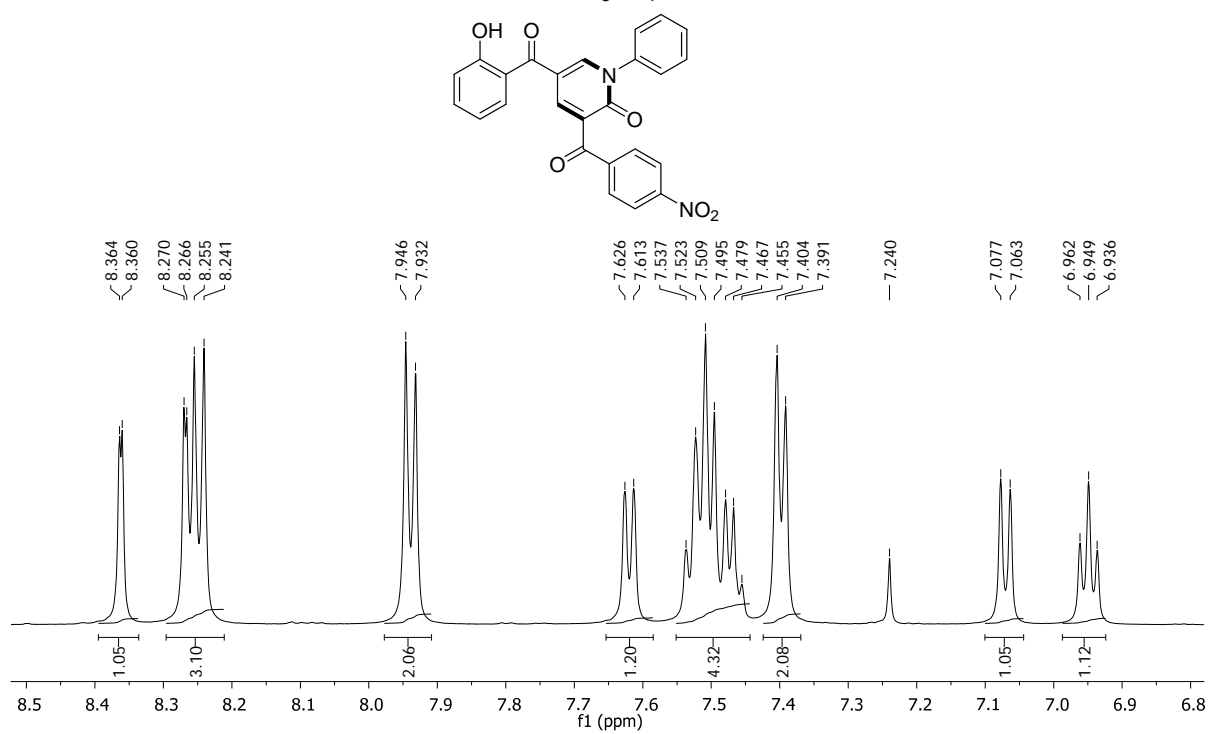

Compound-4o  
<sup>13</sup>C-NMR/CDCl<sub>3</sub>, Expansion

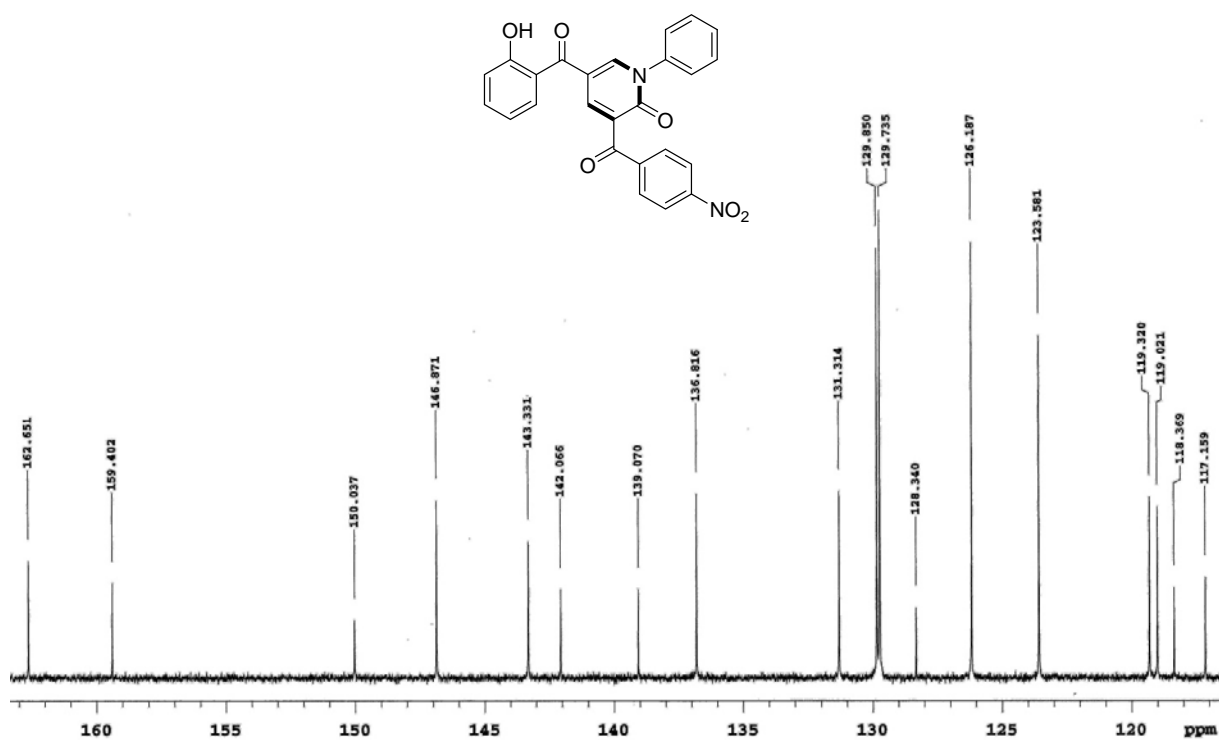

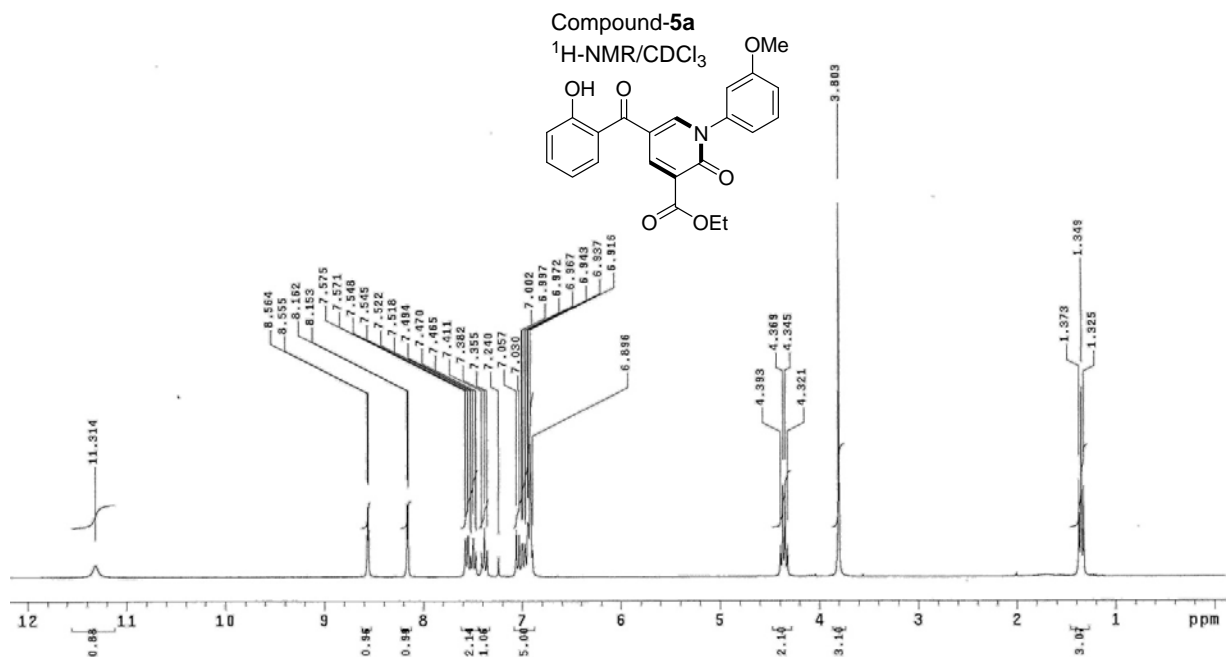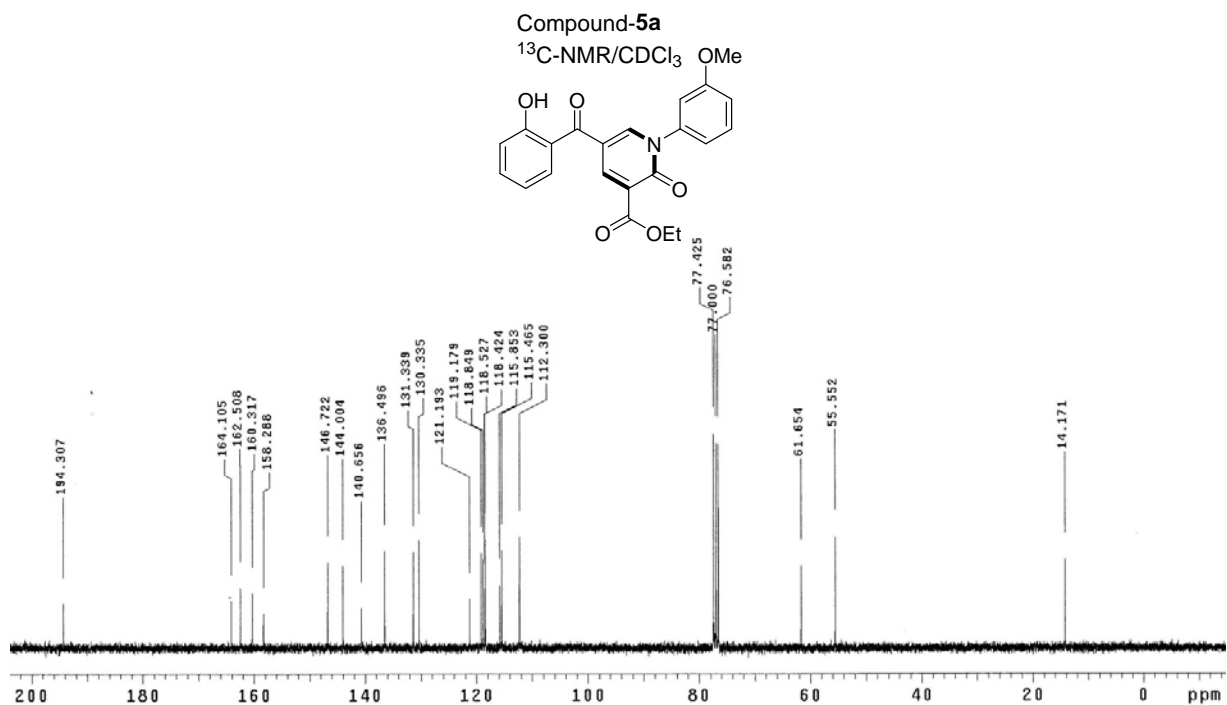

Compound-5a/ Expansion

<sup>1</sup>H-NMR/CDCl<sub>3</sub>

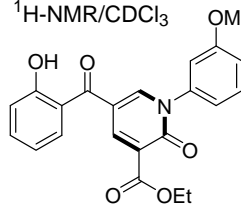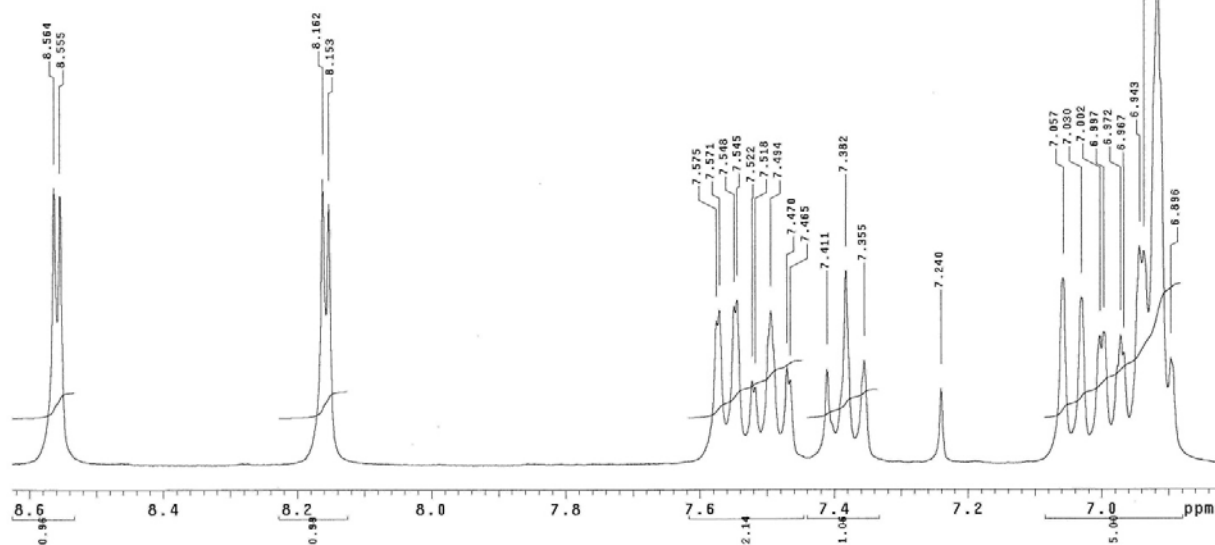

Compound-5a/ Expansion

<sup>13</sup>C-NMR/CDCl<sub>3</sub>

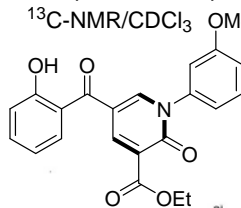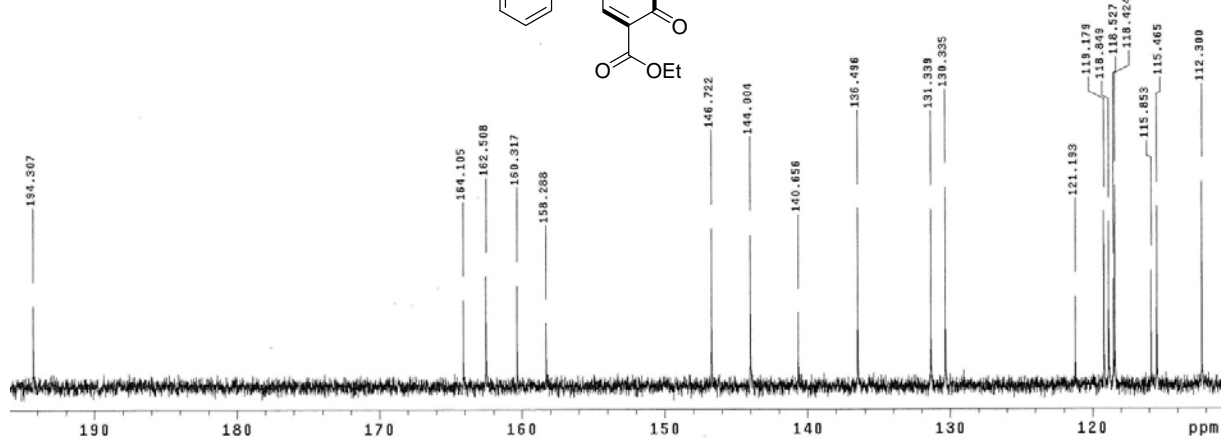

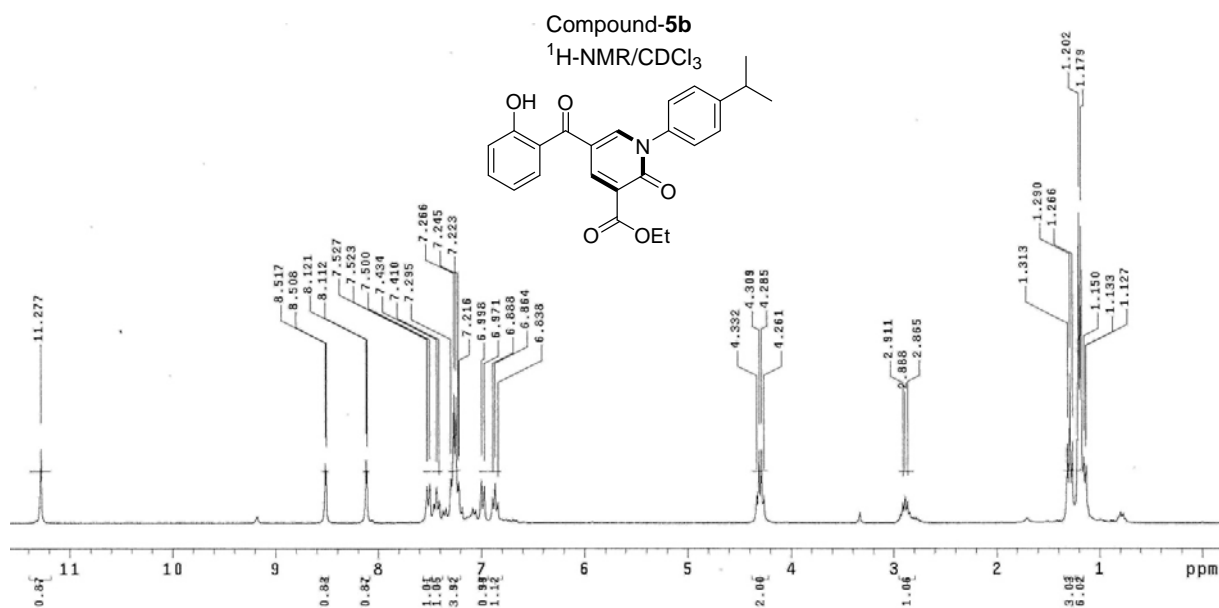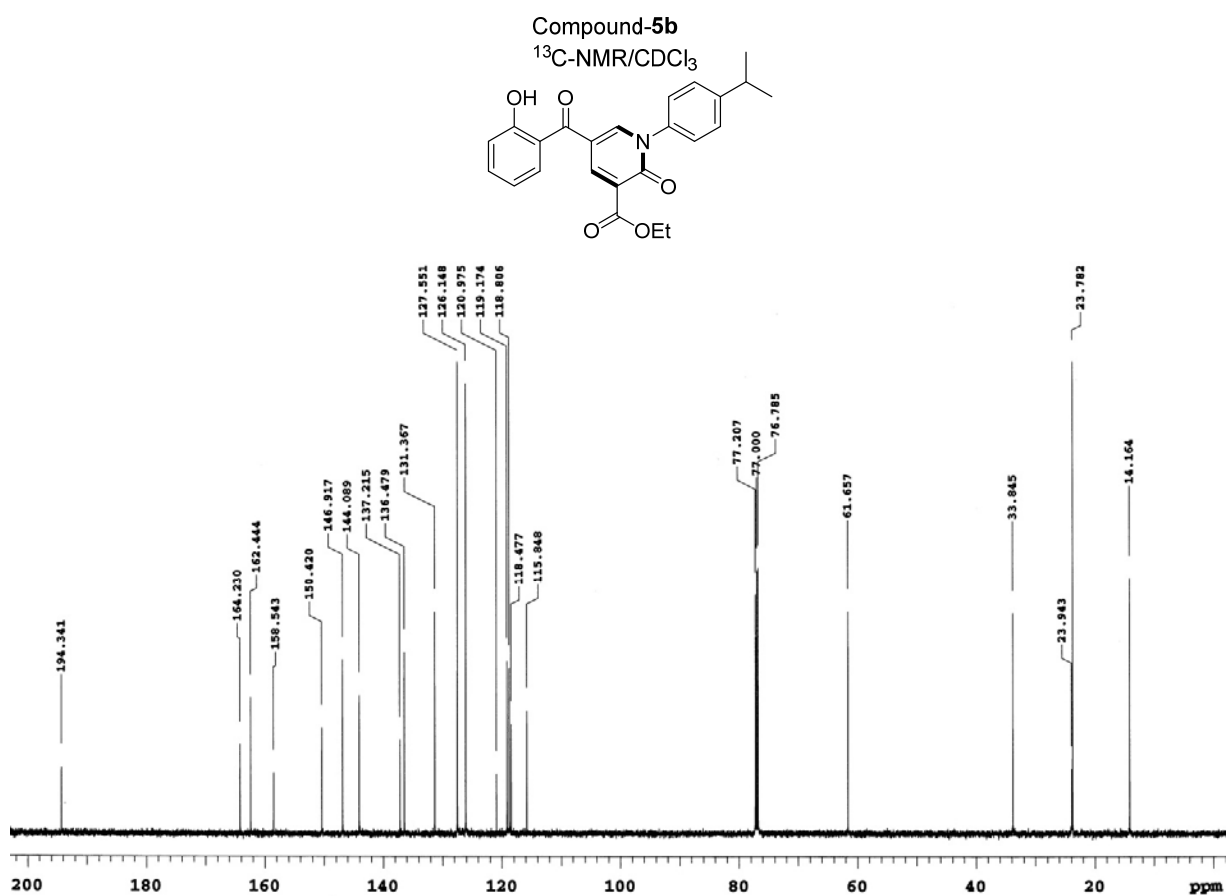

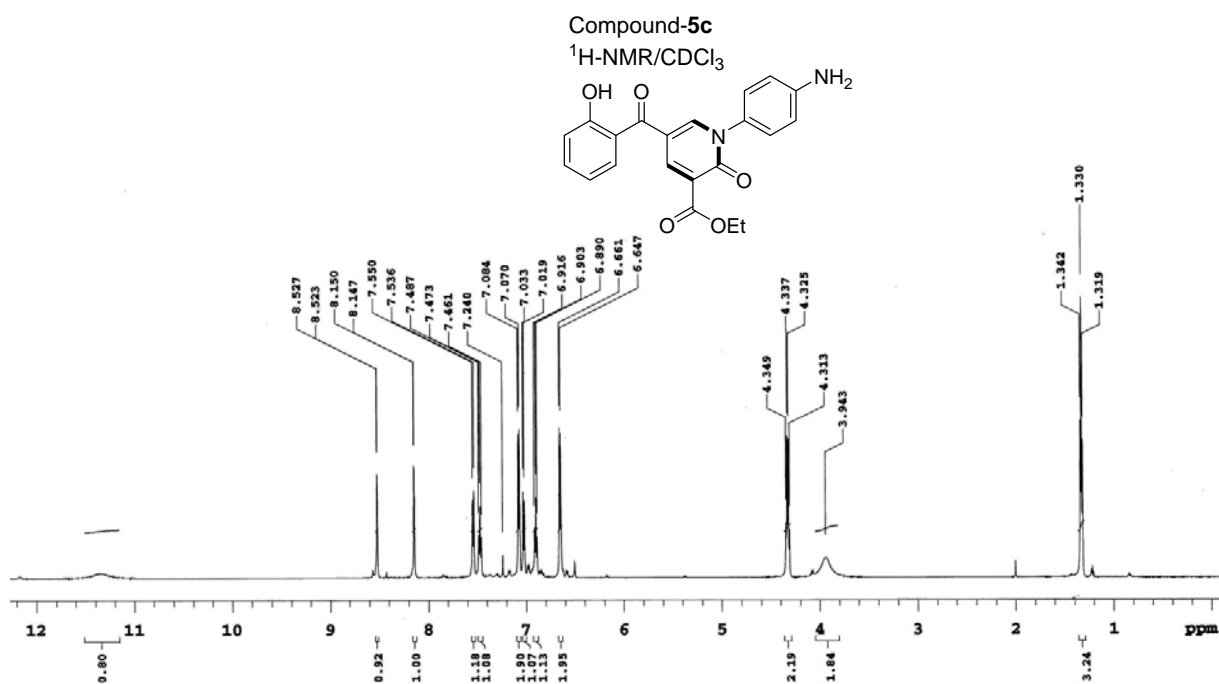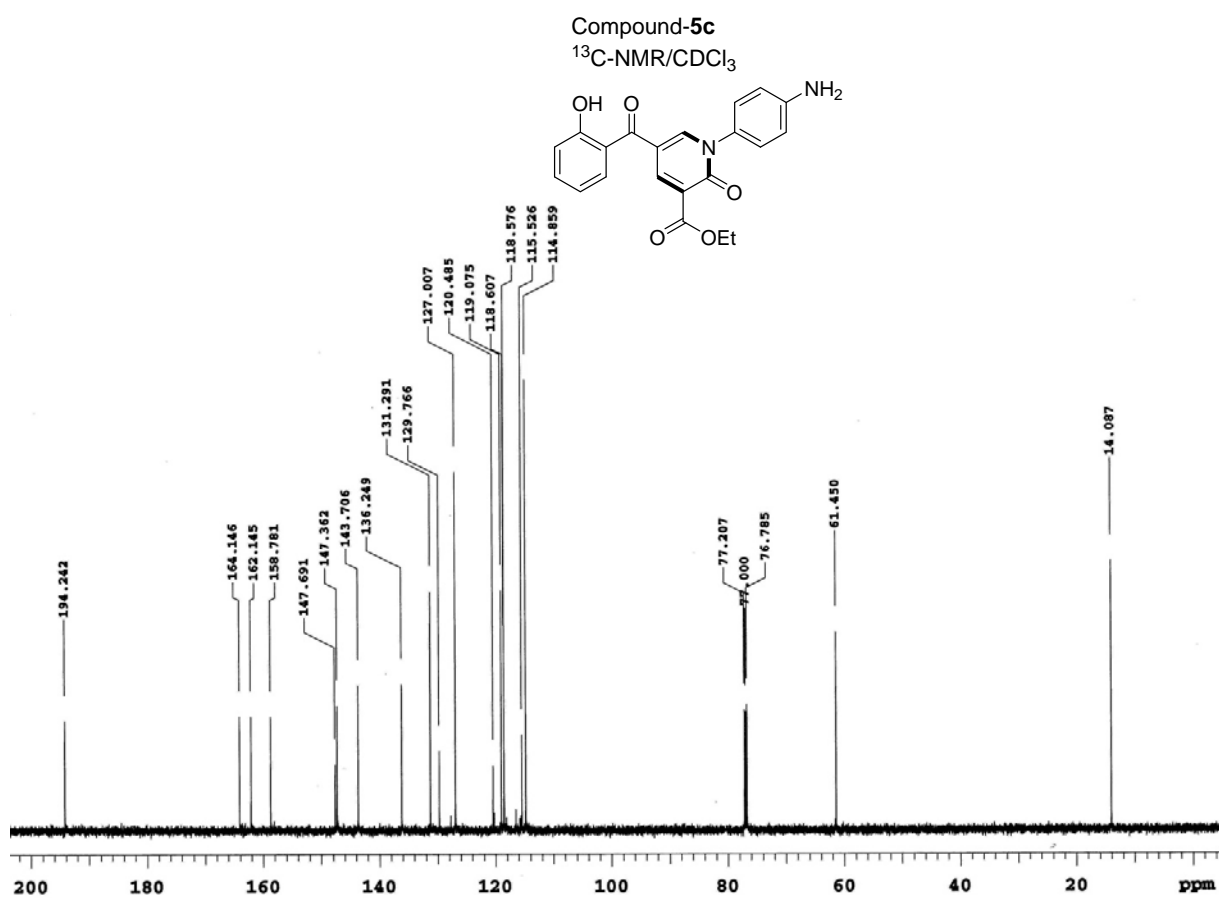

Compound-5c

$^1\text{H-NMR}/\text{CDCl}_3$ , Expansion

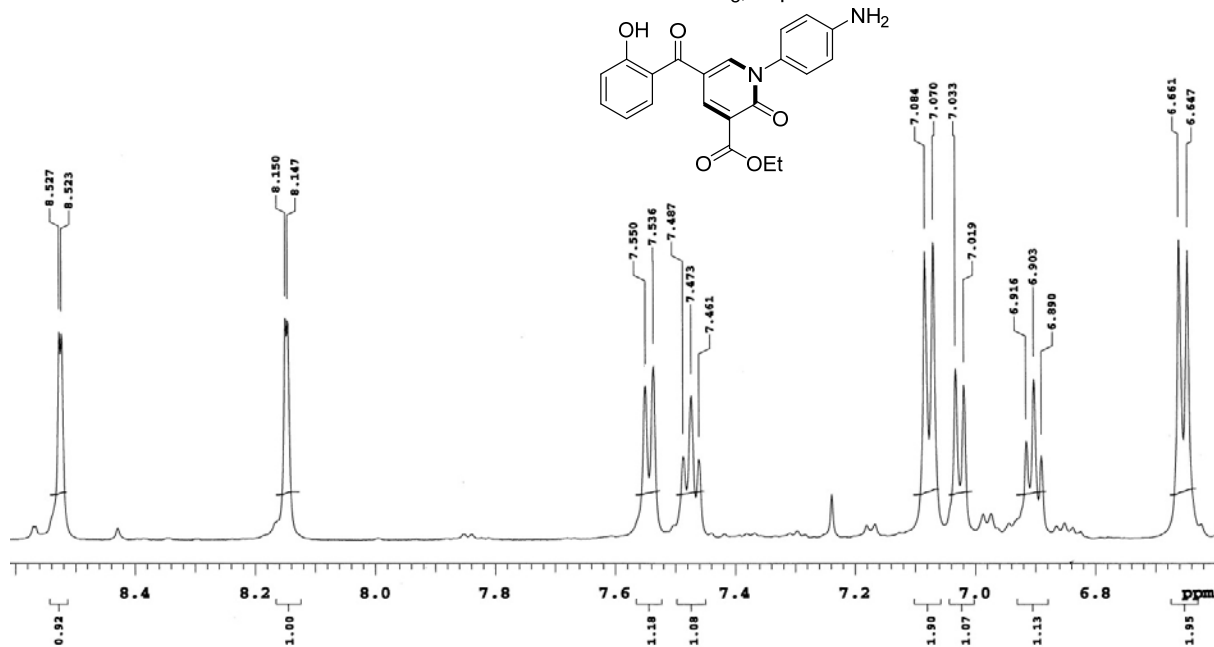

Compound-5c

$^{13}\text{C-NMR}/\text{CDCl}_3$ , Expansion

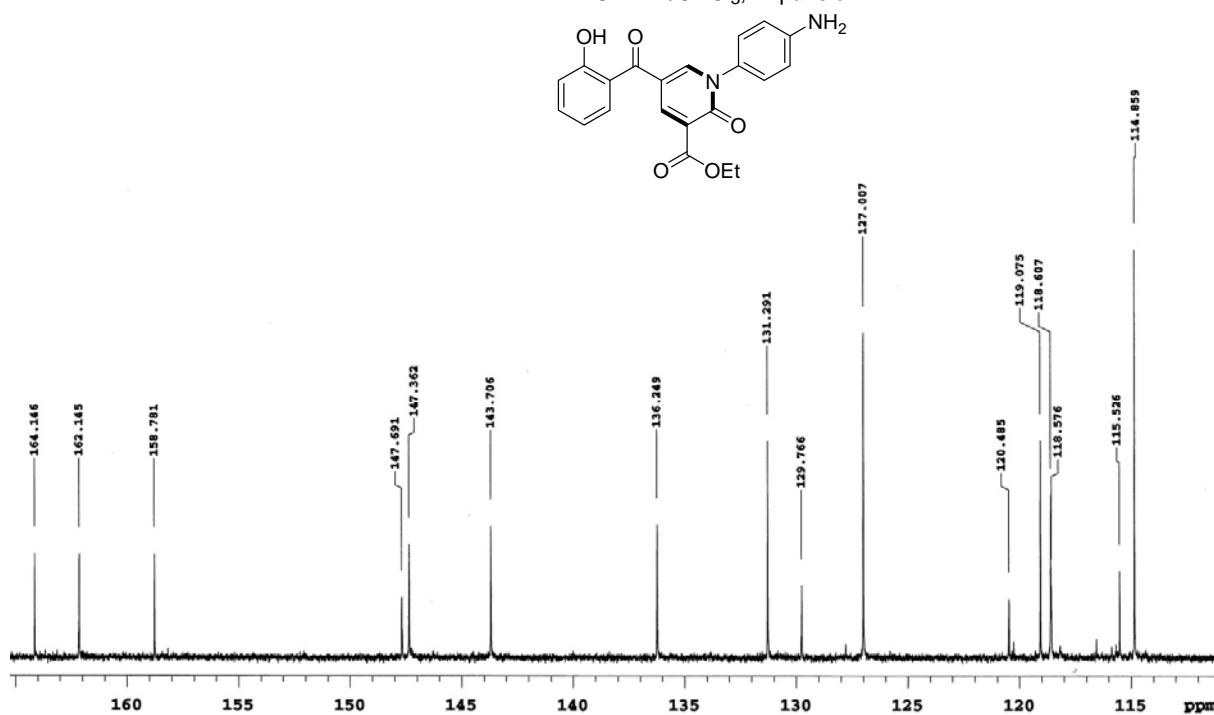

Compound-5d  
<sup>1</sup>H-NMR/CDCl<sub>3</sub>

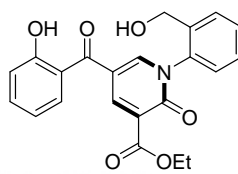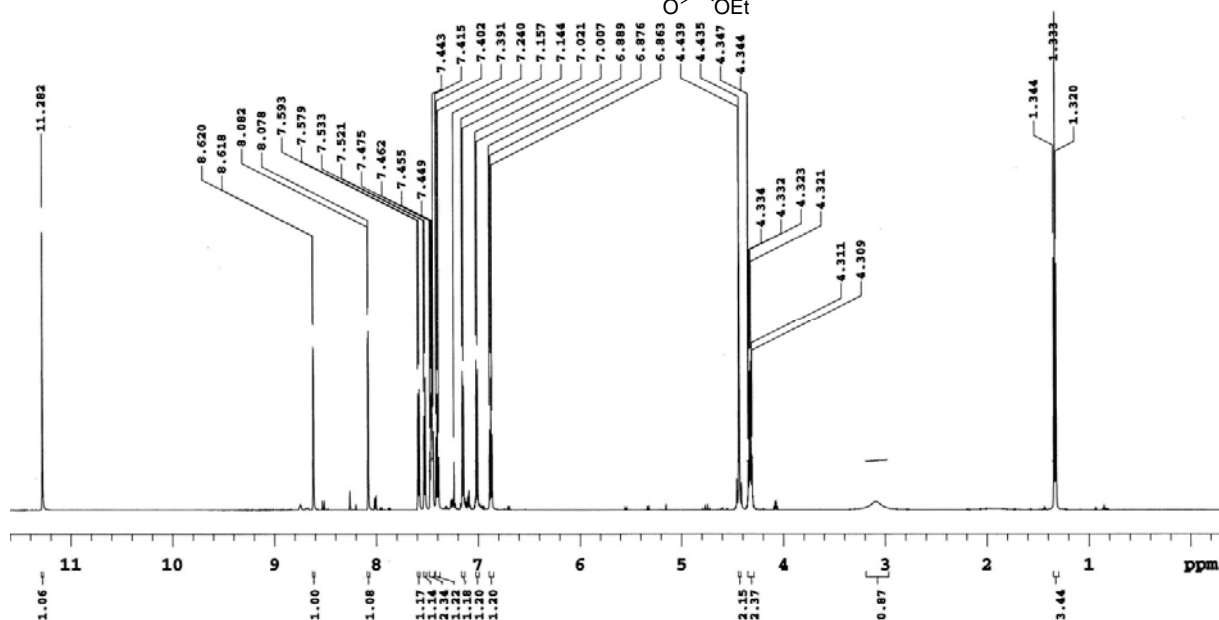

Compound-5d  
<sup>13</sup>C-NMR/CDCl<sub>3</sub>

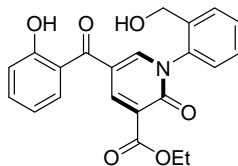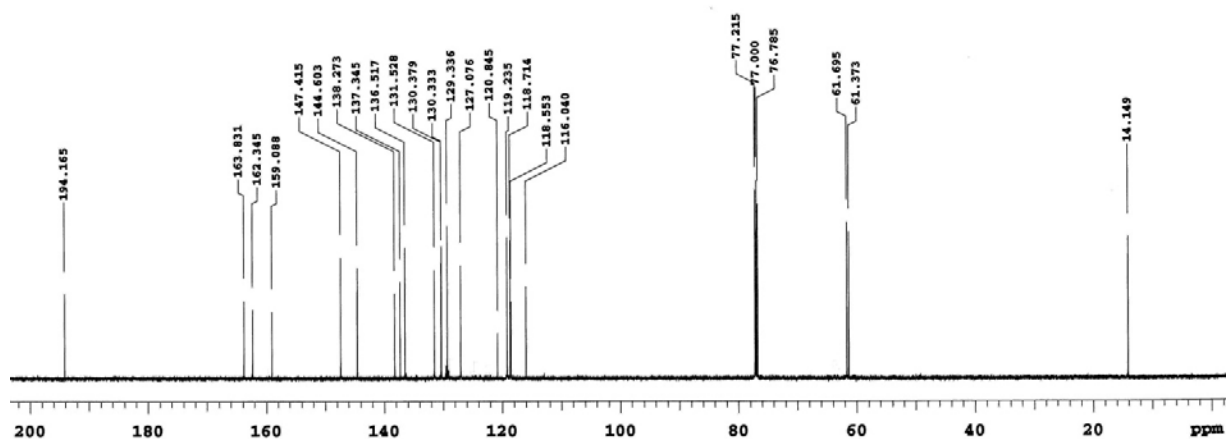

Compound-5d

$^1\text{H-NMR}/\text{CDCl}_3$ , Expansion

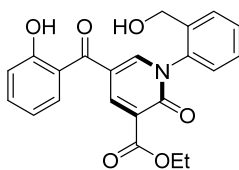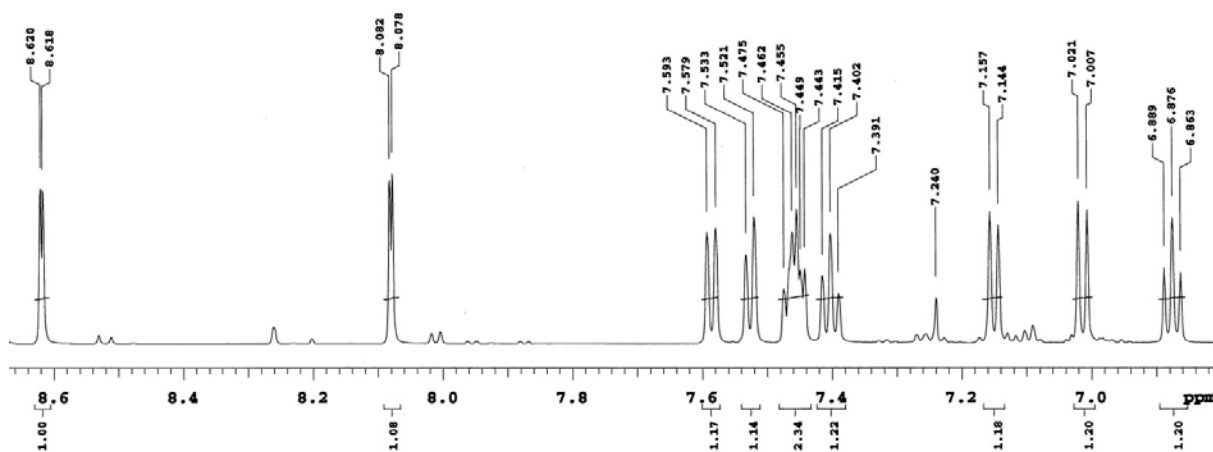

Compound-5d

$^{13}\text{C-NMR}/\text{CDCl}_3$ , Expansion

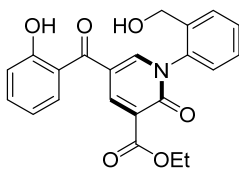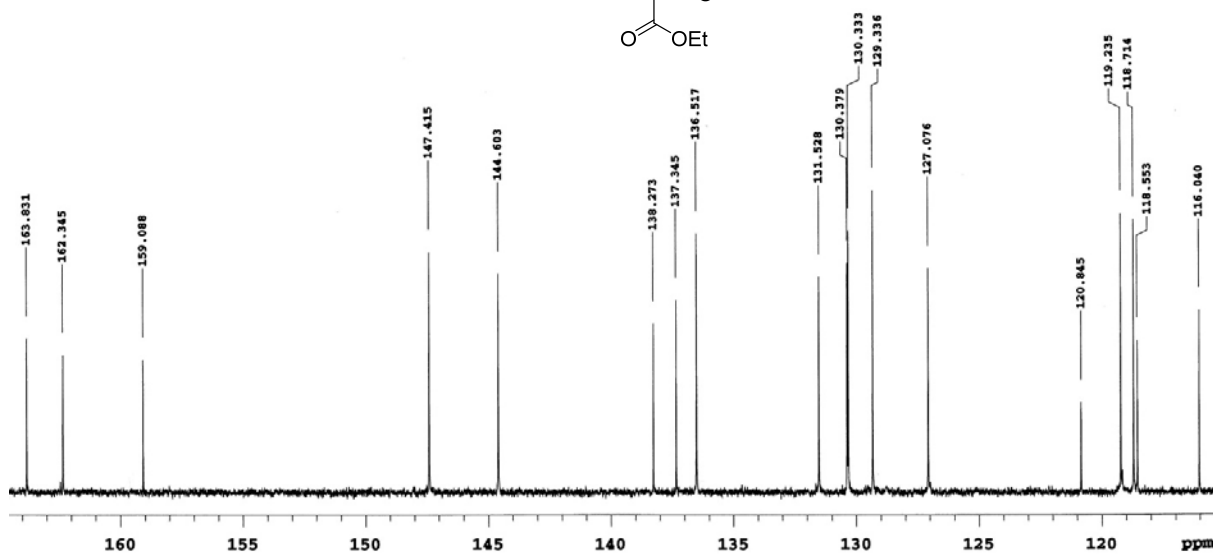

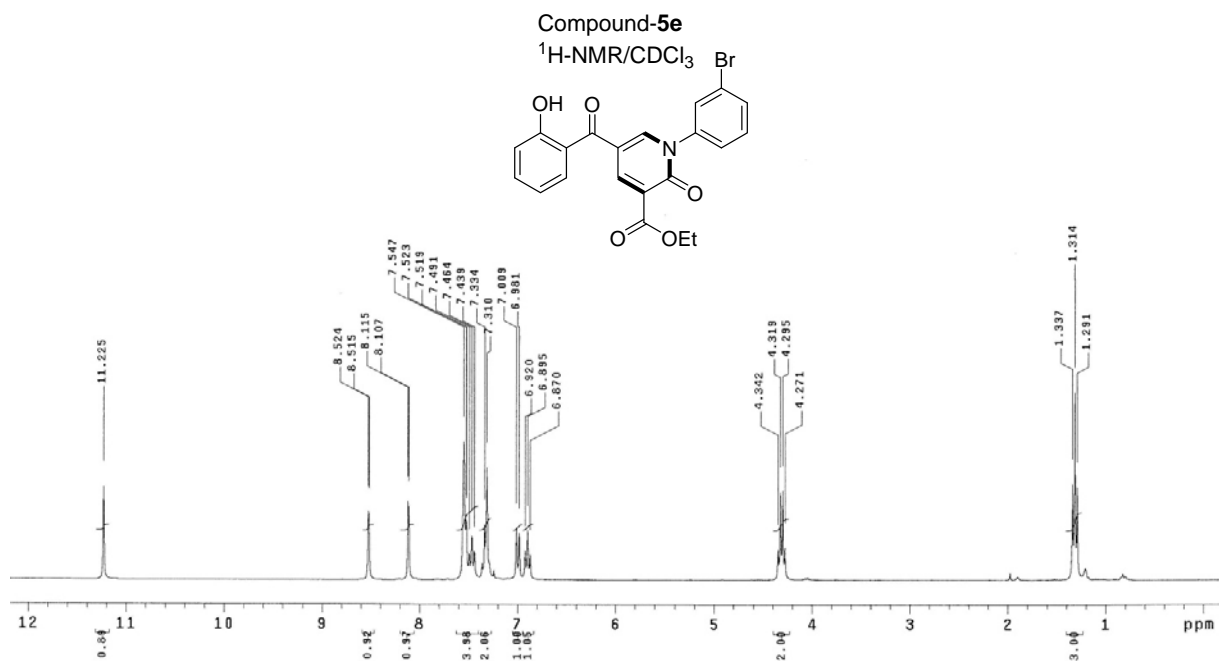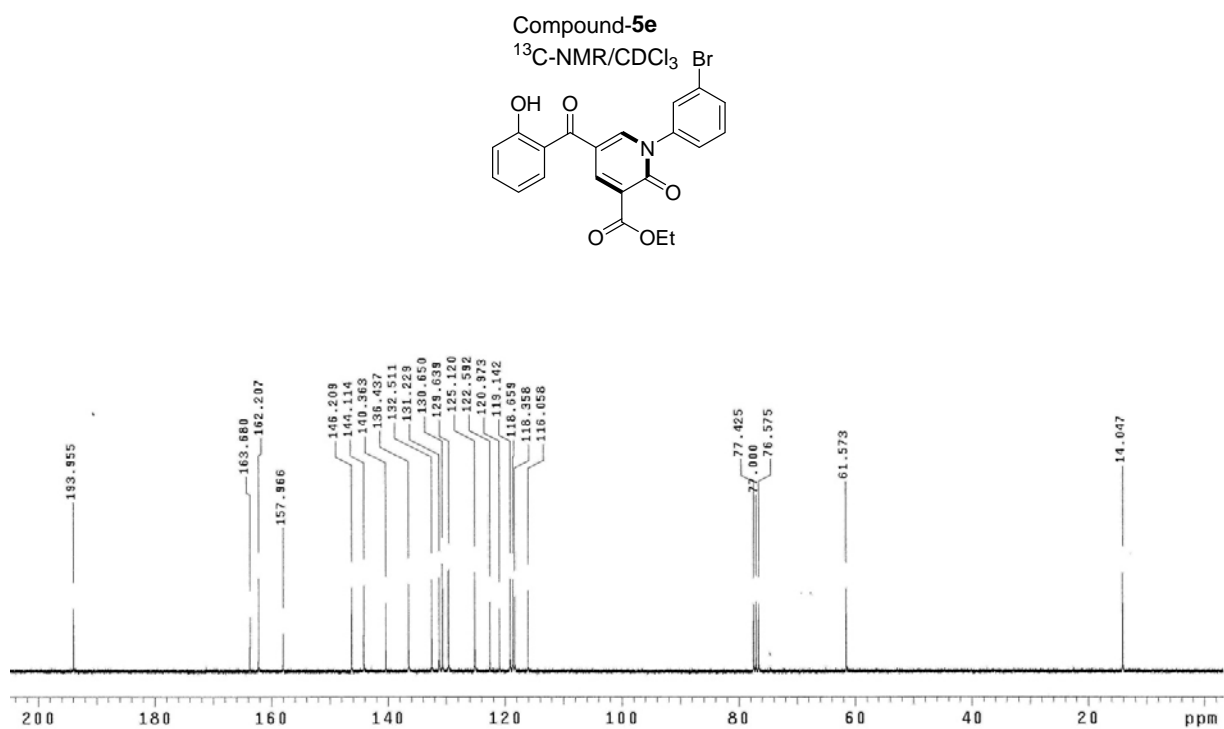

Compound-5e  
<sup>1</sup>H-NMR/CDCl<sub>3</sub>, Expansion

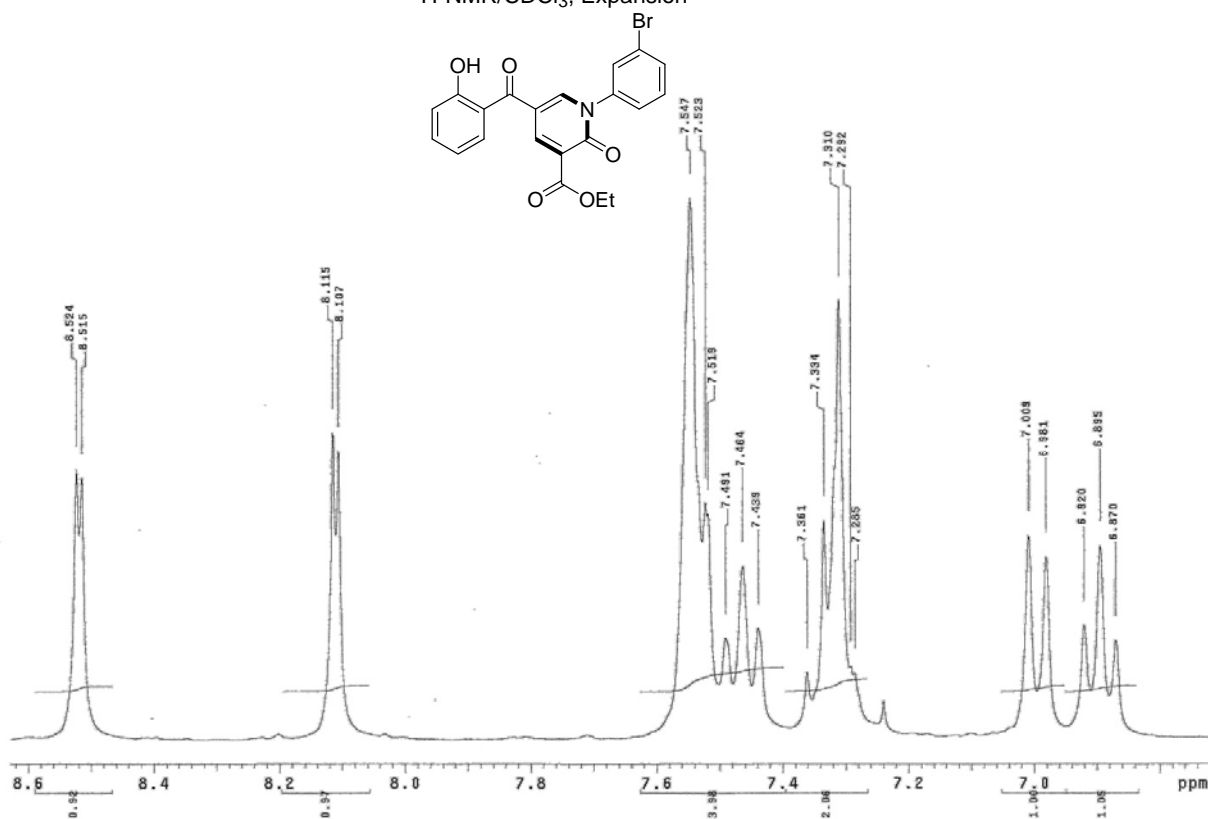

Compound-5e  
<sup>13</sup>C-NMR/CDCl<sub>3</sub>, Expansion

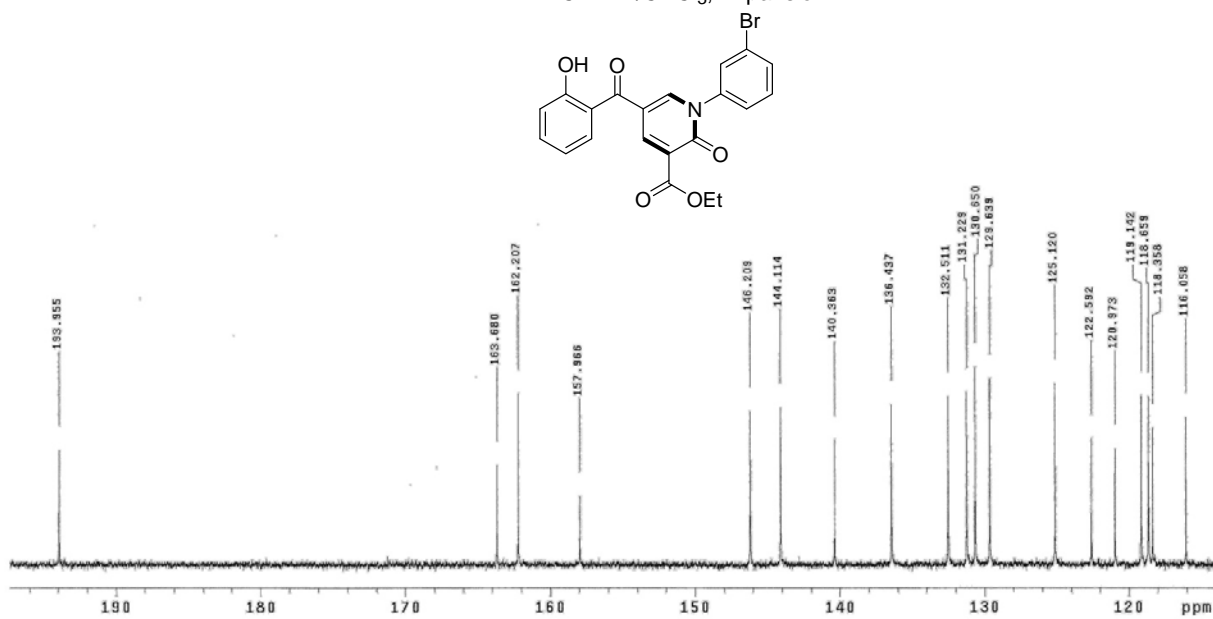

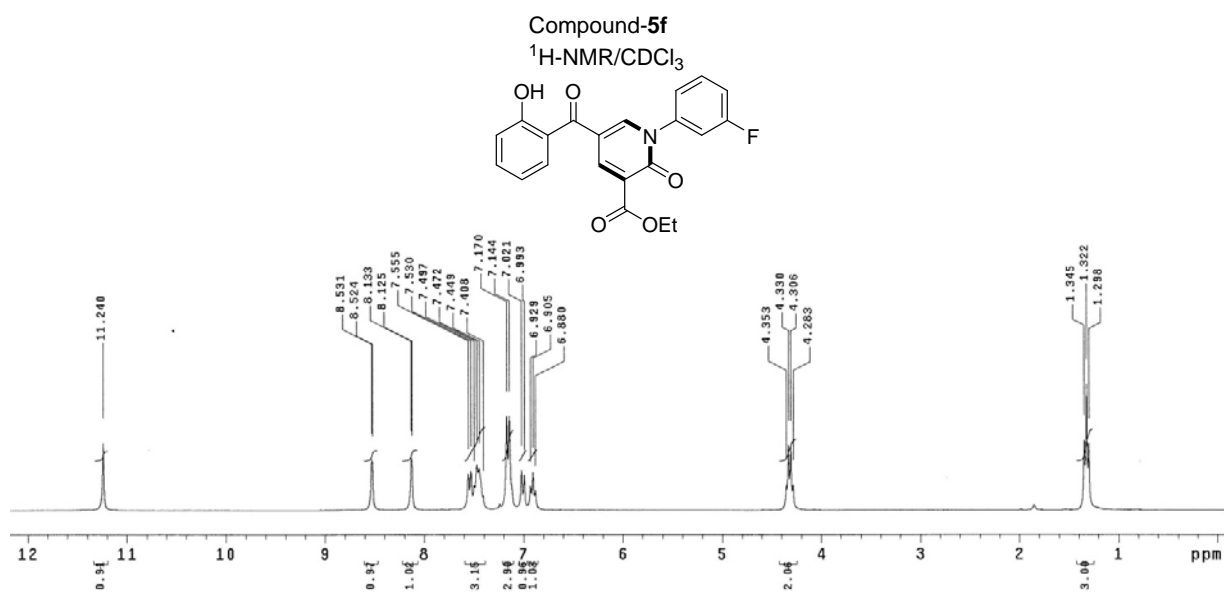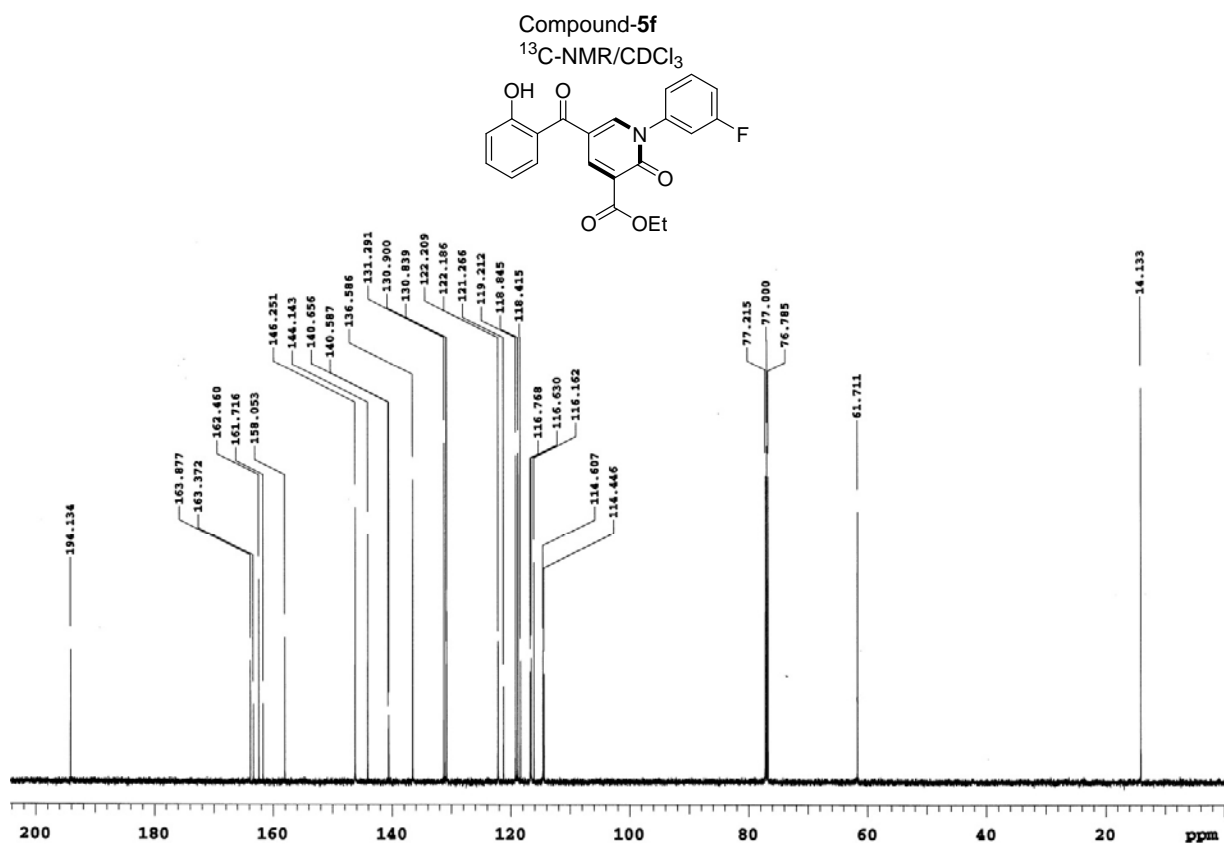

Compound-5f  
<sup>13</sup>C-NMR/CDCl<sub>3</sub>, Expansion

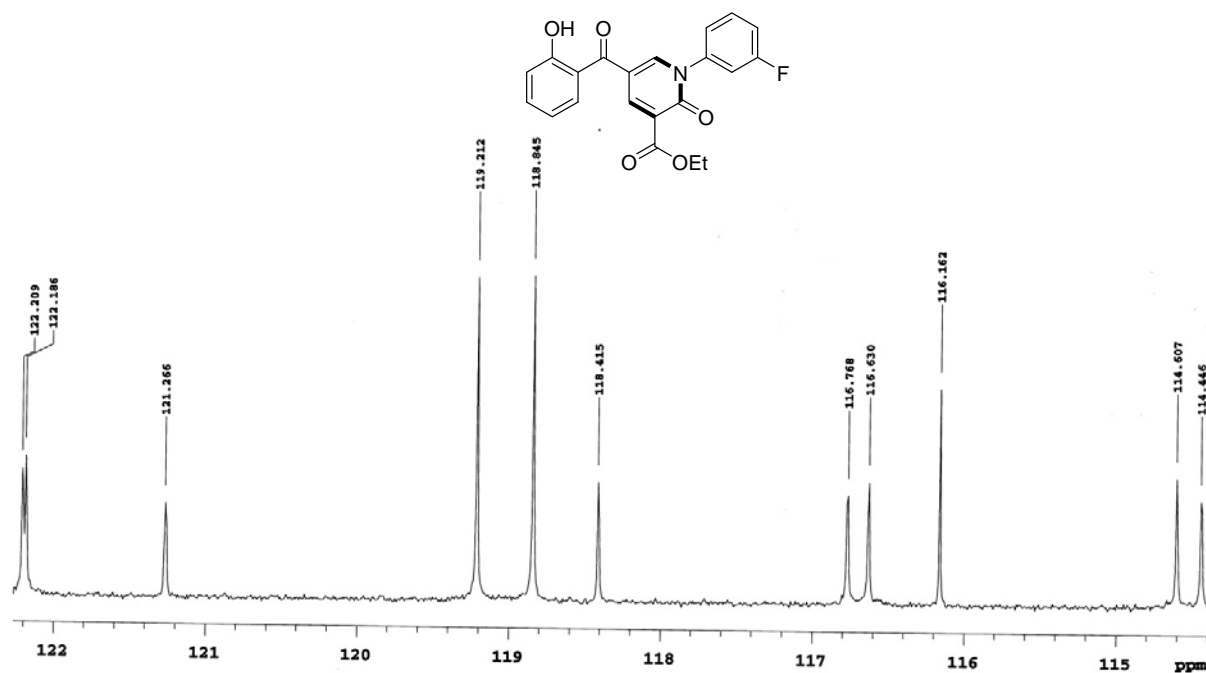

Compound-5f  
<sup>19</sup>F-NMR/CDCl<sub>3</sub>

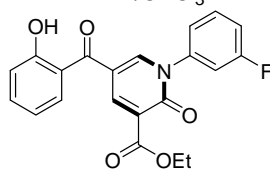

Fidfile: FLOURINE

Pulse Sequence: FLOURINE (a2pul)  
 Solvent: cdcl3  
 Data collected on: May 26 2015

Temp. 25.0 C / 298.1 K  
 Operator: vmmr1

Relax. delay 1.000 sec  
 Pulse 30.0 degrees  
 Acq. time 0.996 sec  
 Width 131.6 kHz  
 16 repetitions

OBSERVE F19, 564.4292497 MHz  
 DATA PROCESSING  
 FT size 262144  
 Total time 0 min 32 sec

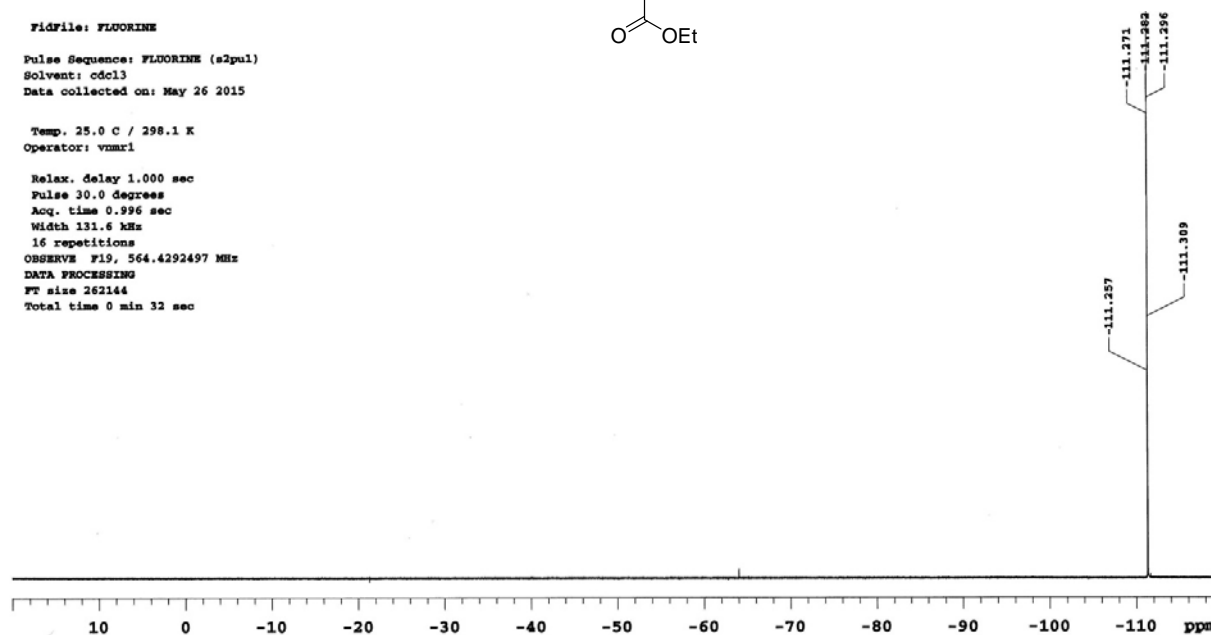

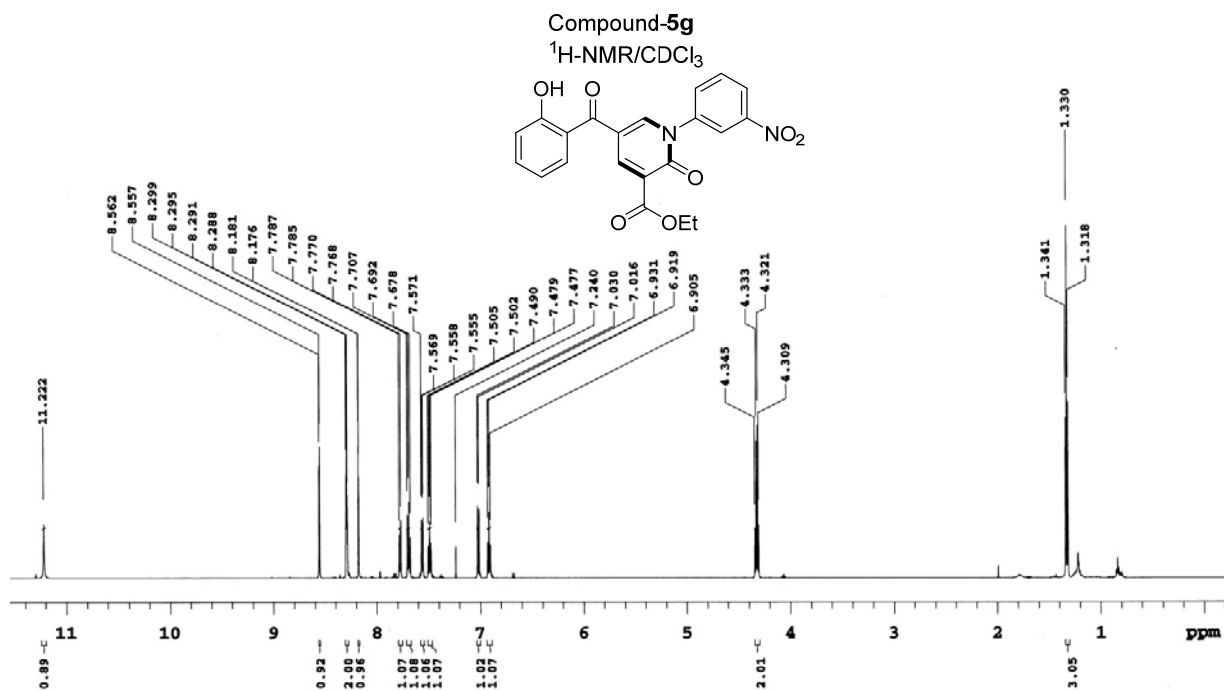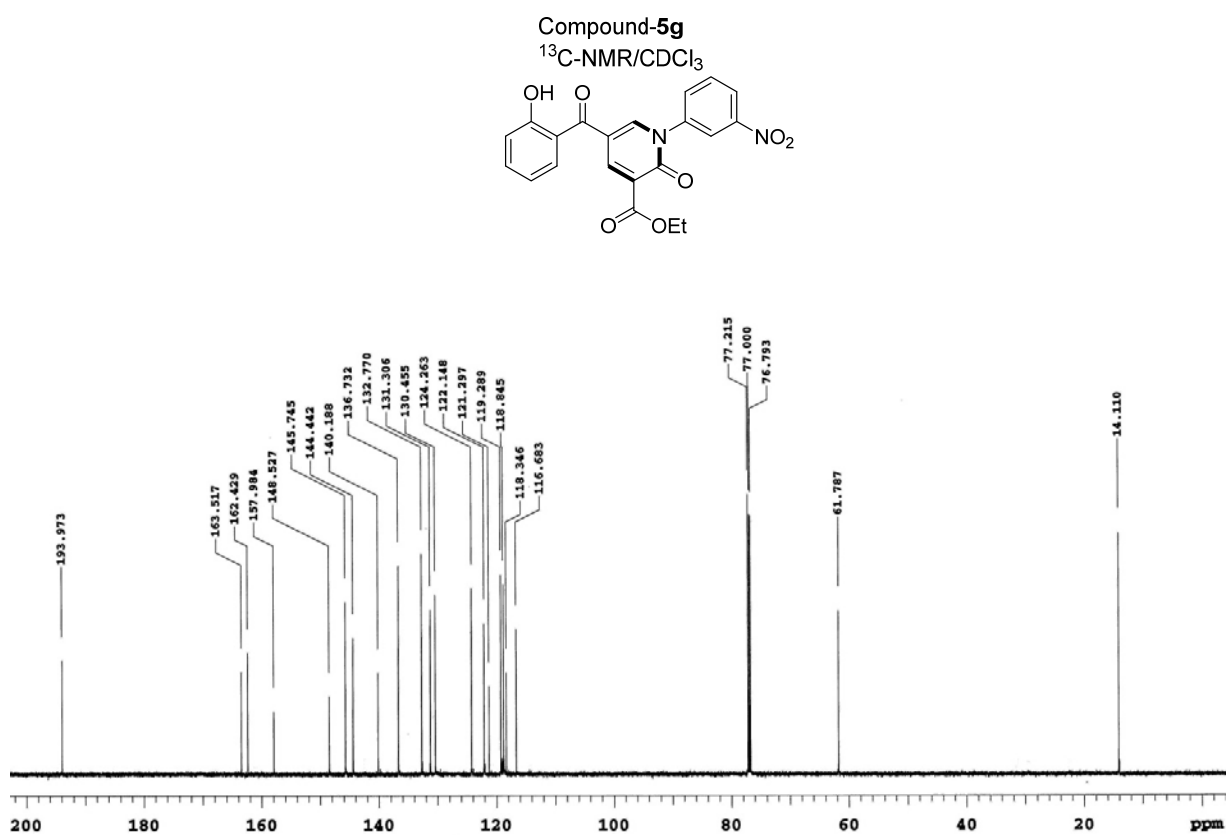

Compound-5g

$^1\text{H-NMR}/\text{CDCl}_3$ , Expansion

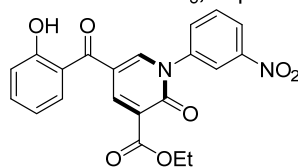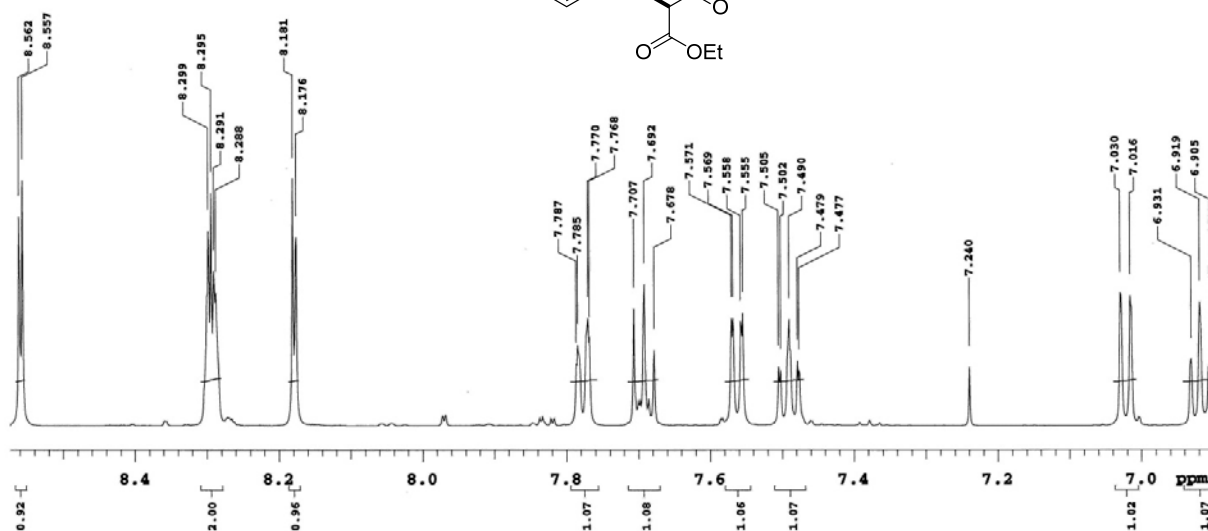

Compound-5g

$^{13}\text{C-NMR}/\text{CDCl}_3$ , Expansion

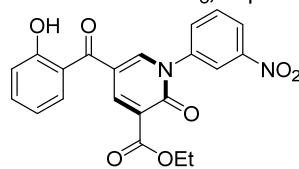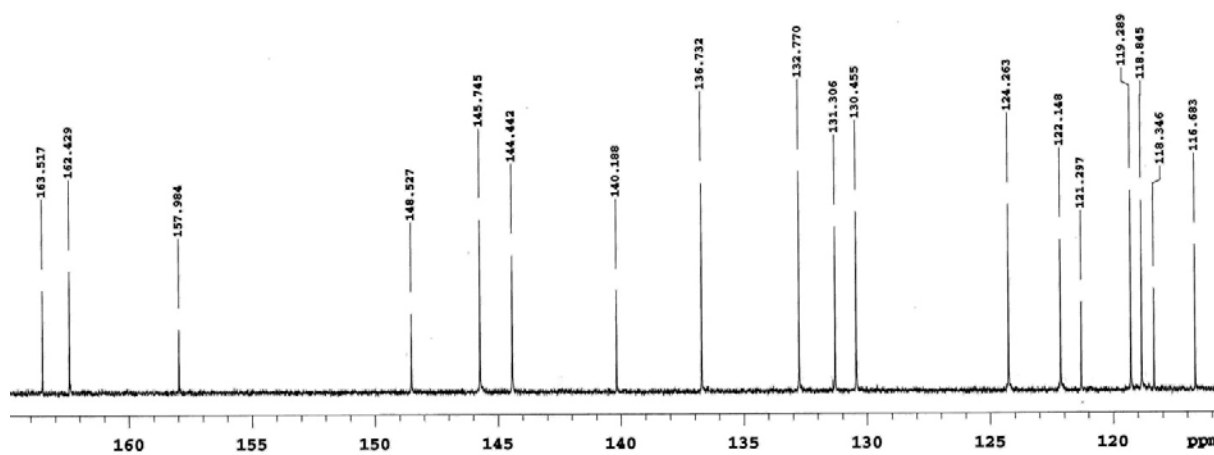

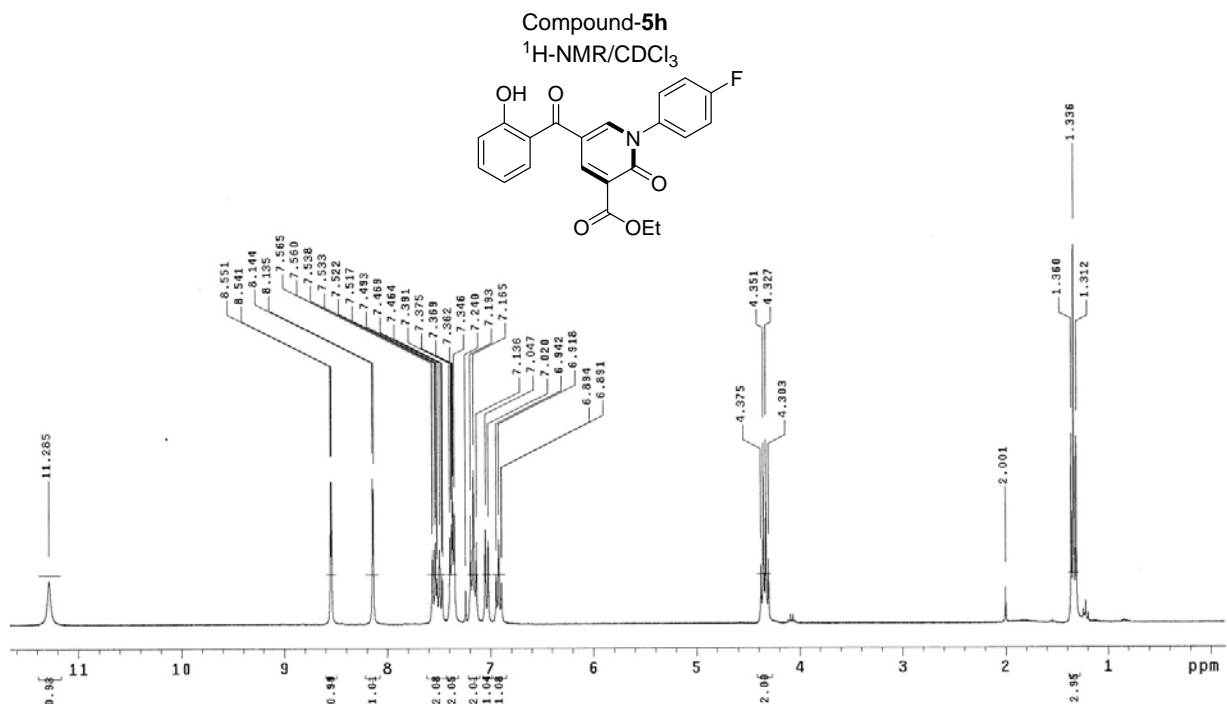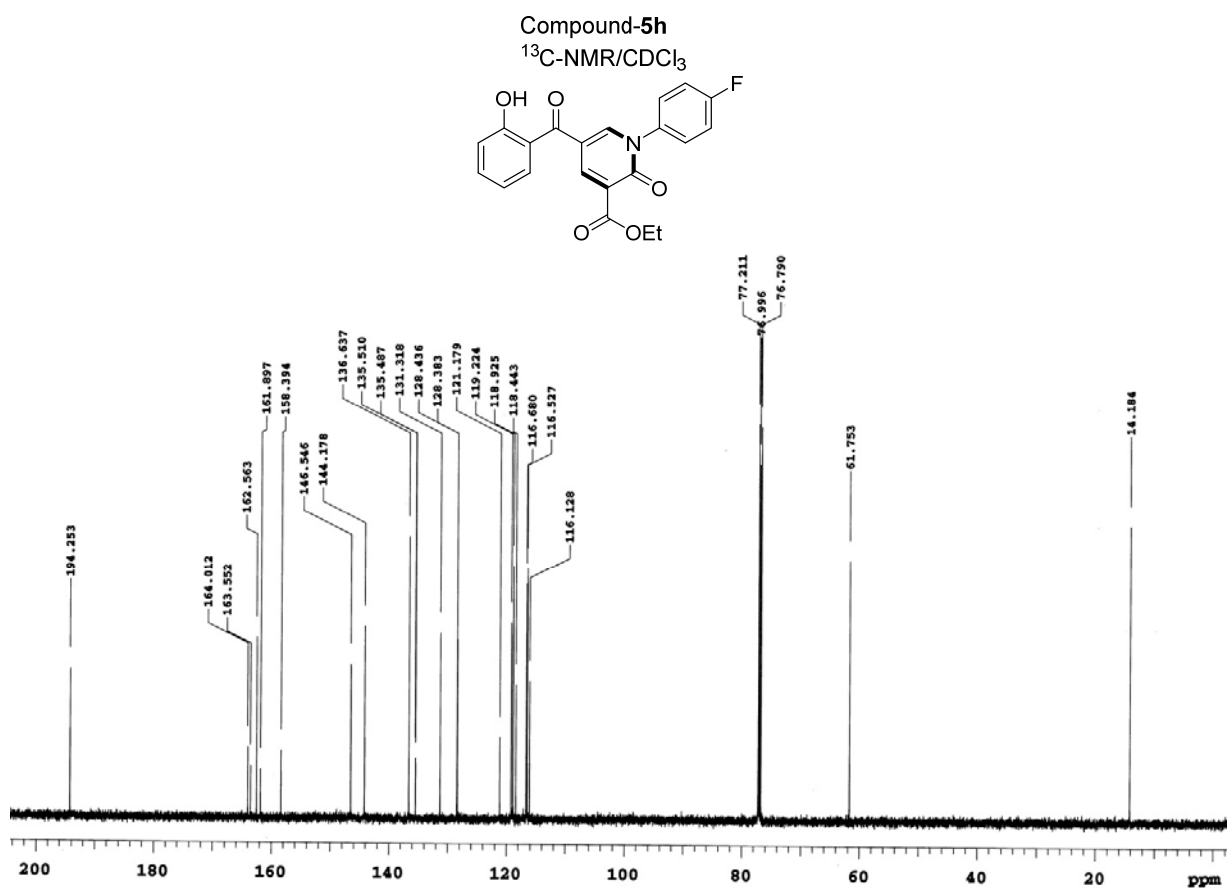

Compound-5h  
<sup>13</sup>C-NMR/CDCl<sub>3</sub>, Expansion

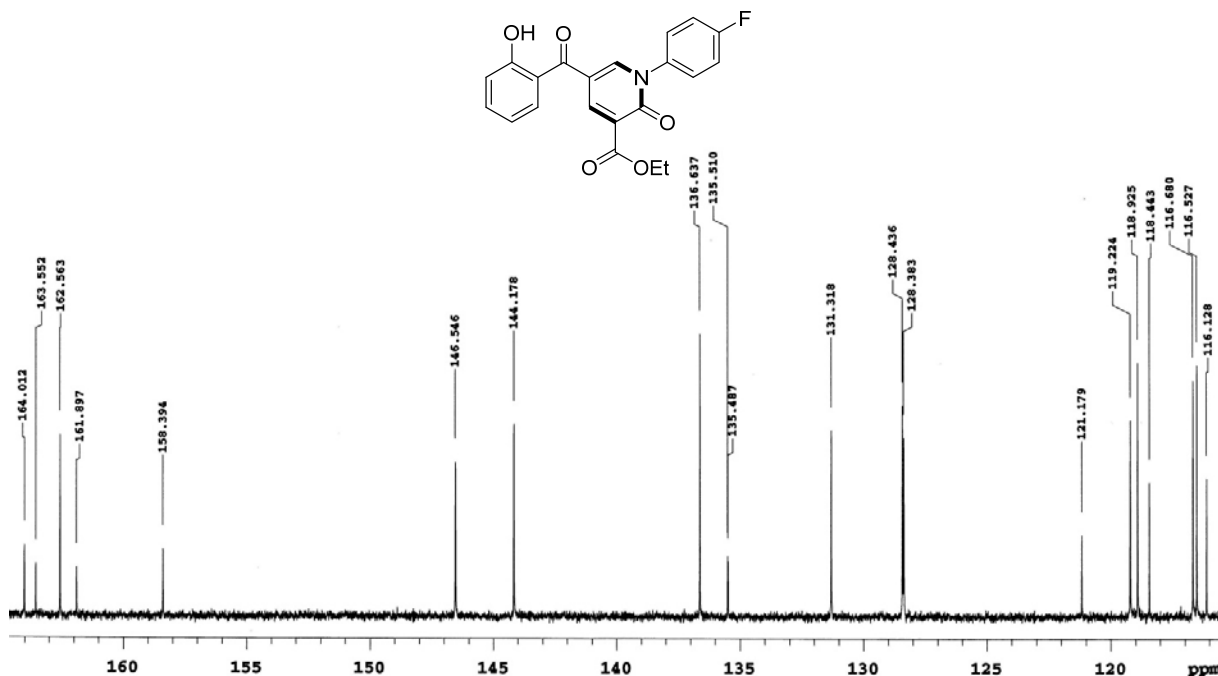

Compound-5h  
<sup>19</sup>F-NMR/CDCl<sub>3</sub>

FidFile: FIDORINE  
Pulse Sequence: FIDORINE (s2pul)  
Solvent: cdcl3  
Data collected on: May 26 2015  
  
Temp. 25.0 C / 298.1 K  
Operator: vmmrl  
  
Relax. delay 1.000 sec  
Pulse 30.0 degrees  
Acq. time 0.996 sec  
Width 131.6 kHz  
32 repetitions  
OBSERVE F19, 564.4292386 MHz  
DATA PROCESSING  
FT size 262144  
Total time 33 min

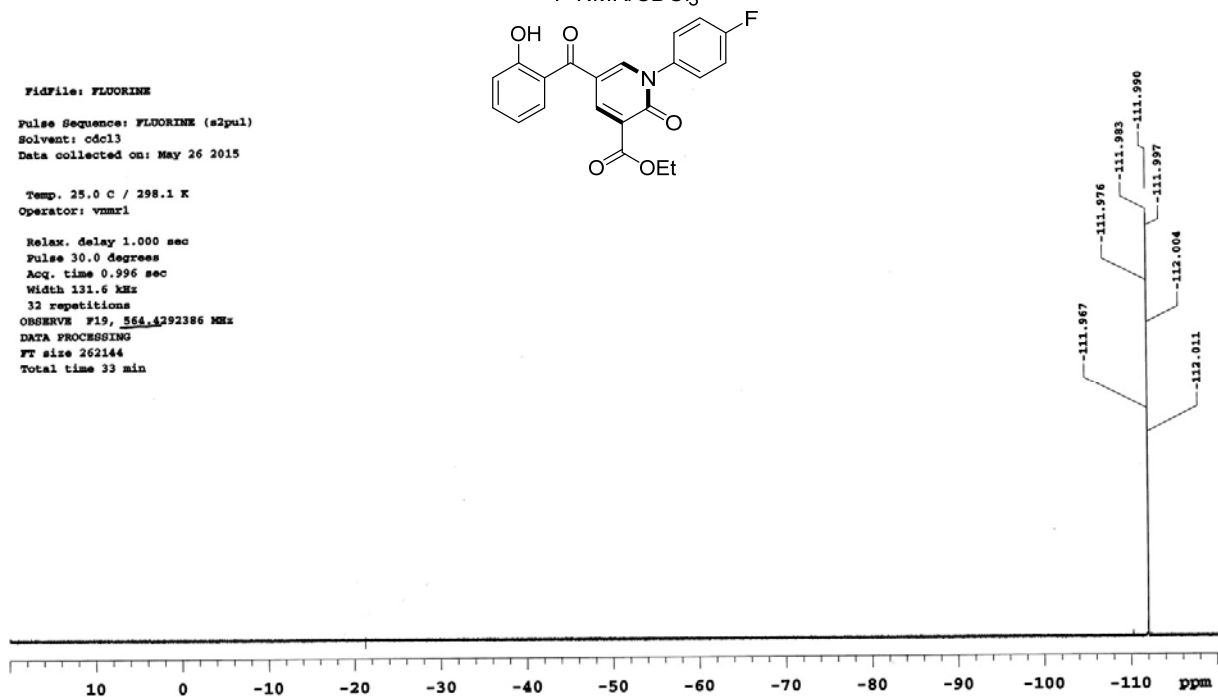

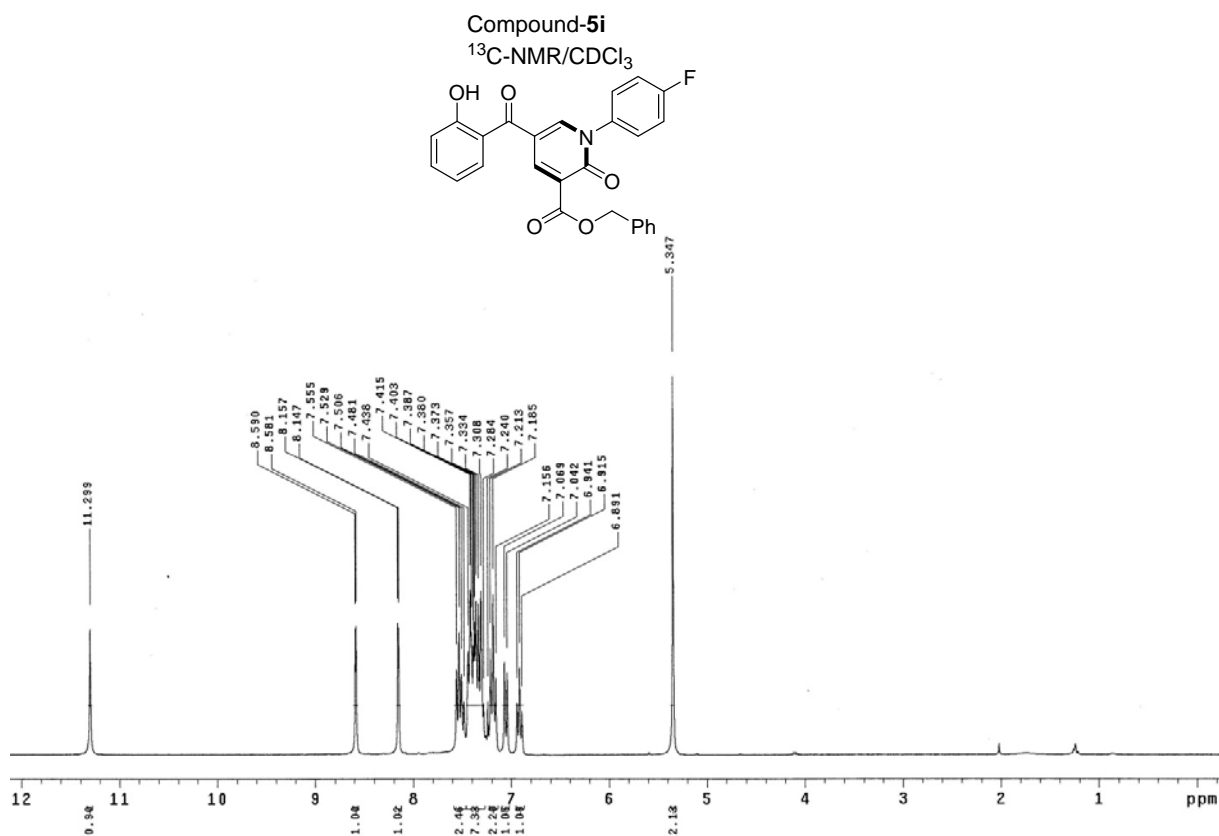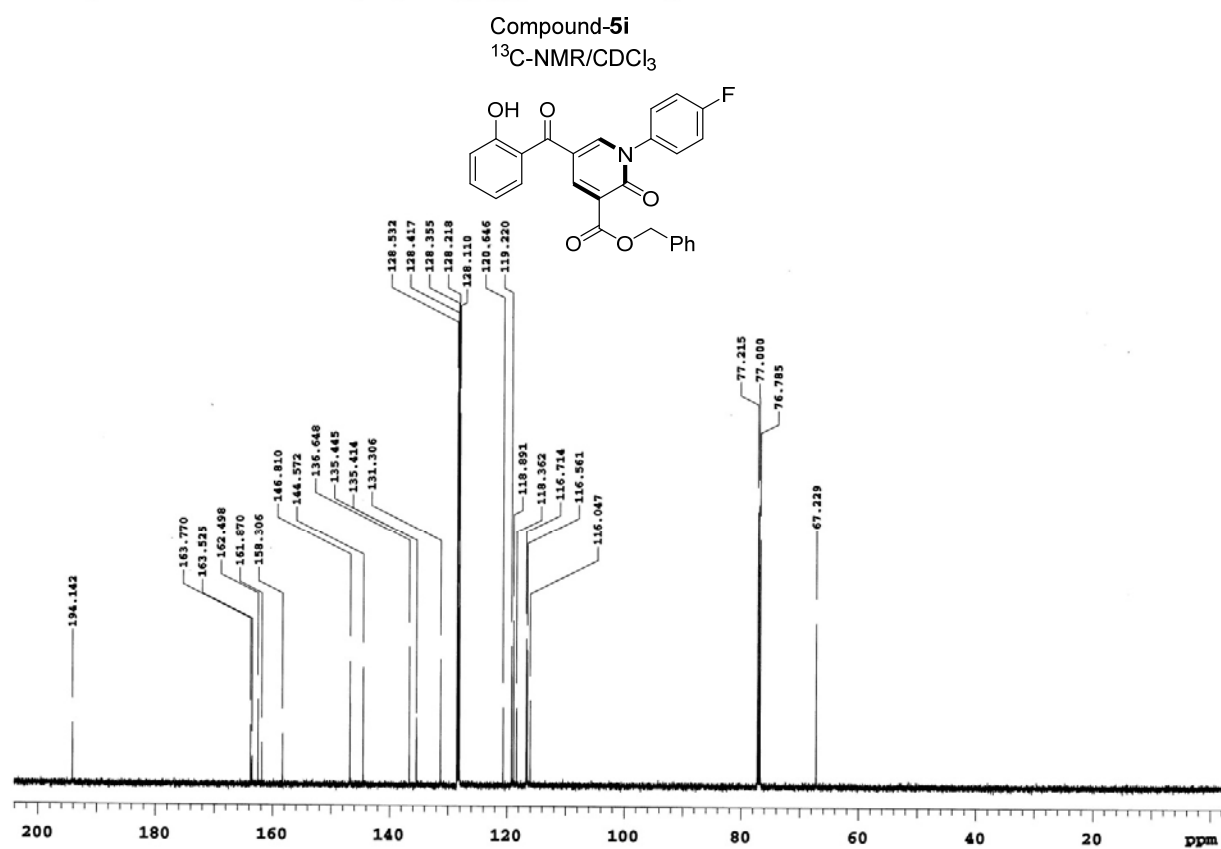

Compound-5i  
<sup>13</sup>C-NMR/CDCl<sub>3</sub>, Expansion

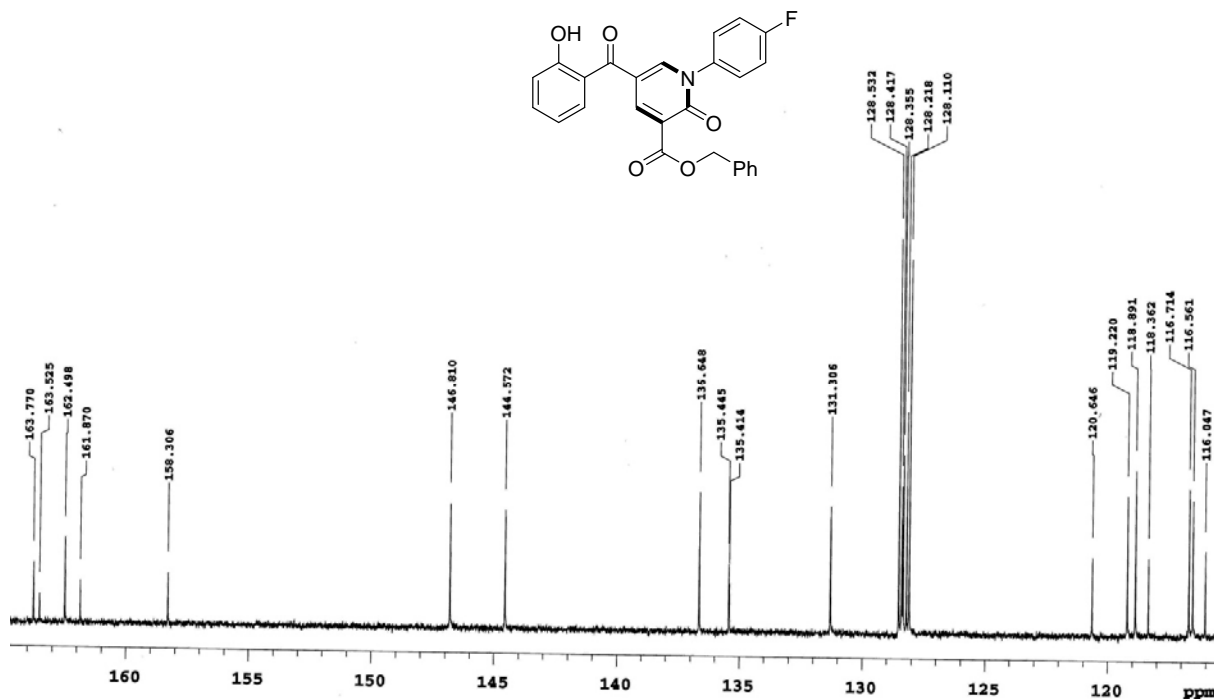

Compound-5i  
<sup>19</sup>F-NMR/CDCl<sub>3</sub>

FidFile: FLUORINE  
Pulse Sequence: FLUORINE (s2pul)  
Solvent: cdcl3  
Data collected on: May 26 2015

Temp. 25.0 C / 298.1 K  
Operator: vmmr1

Relax. delay 1.000 sec  
Pulse 30.0 degrees  
Acq. time 0.996 sec  
Width 131.6 kHz  
16 repetitions  
OBSERVE F19, 564.4292397 MHz  
DATA PROCESSING  
FT size 262144  
Total time 0 min 32 sec

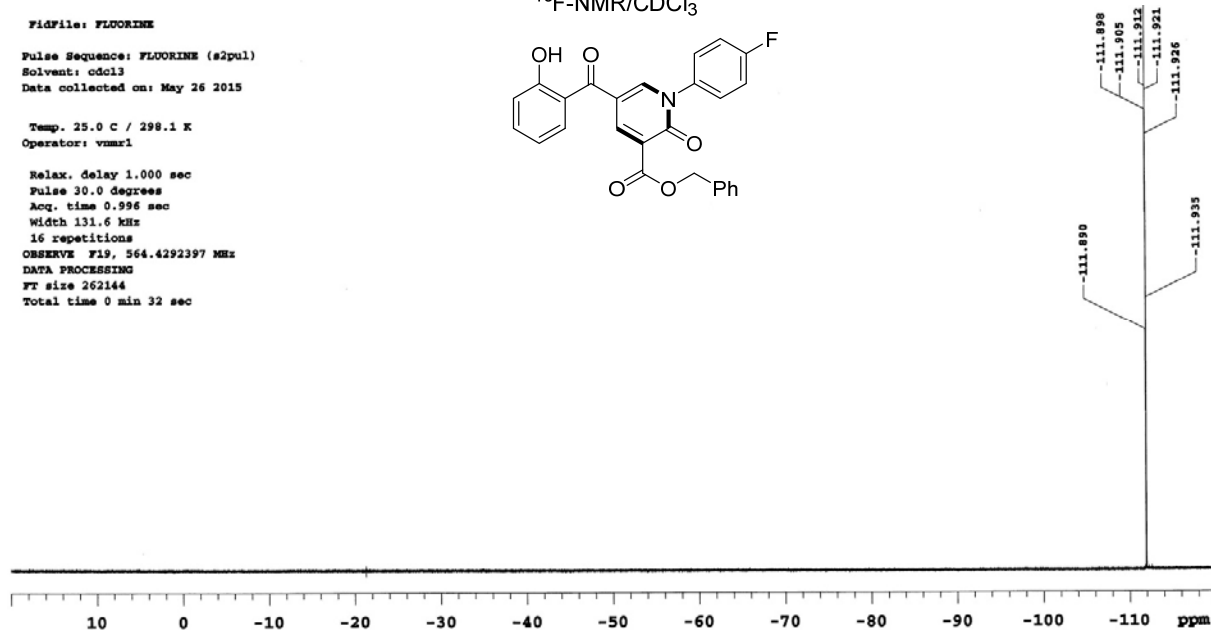

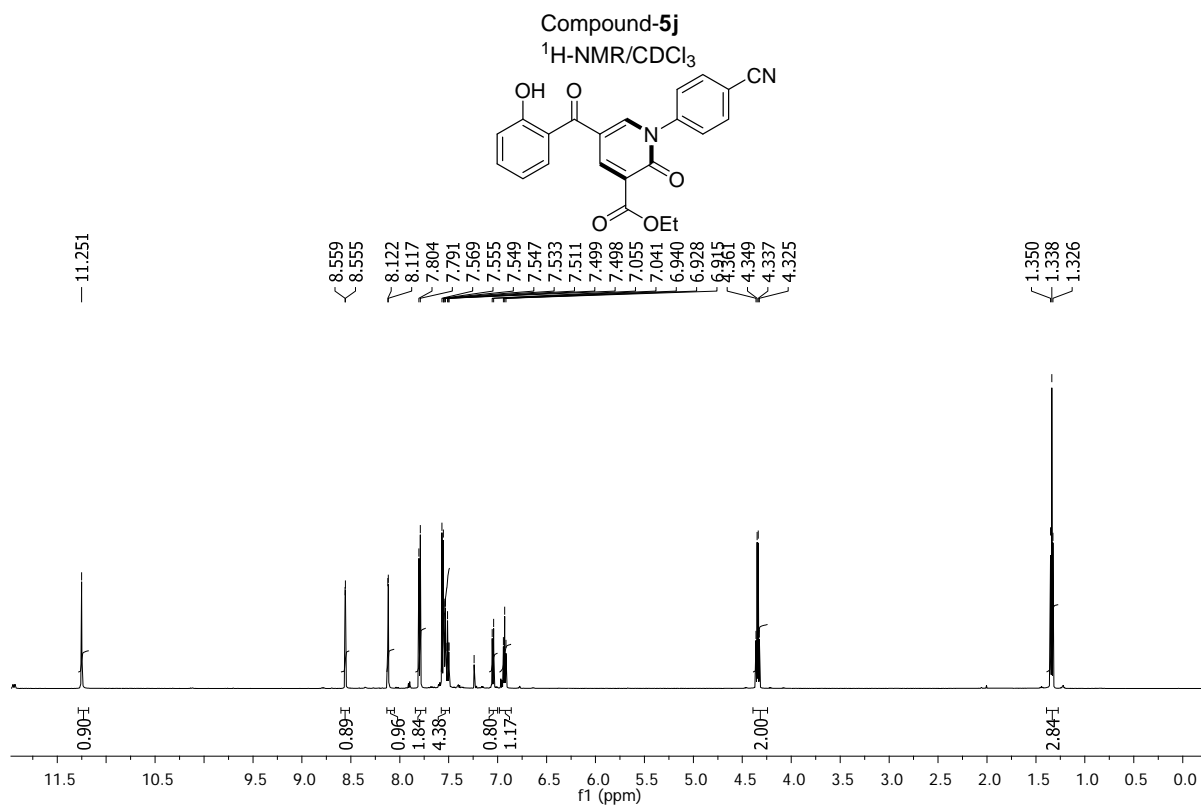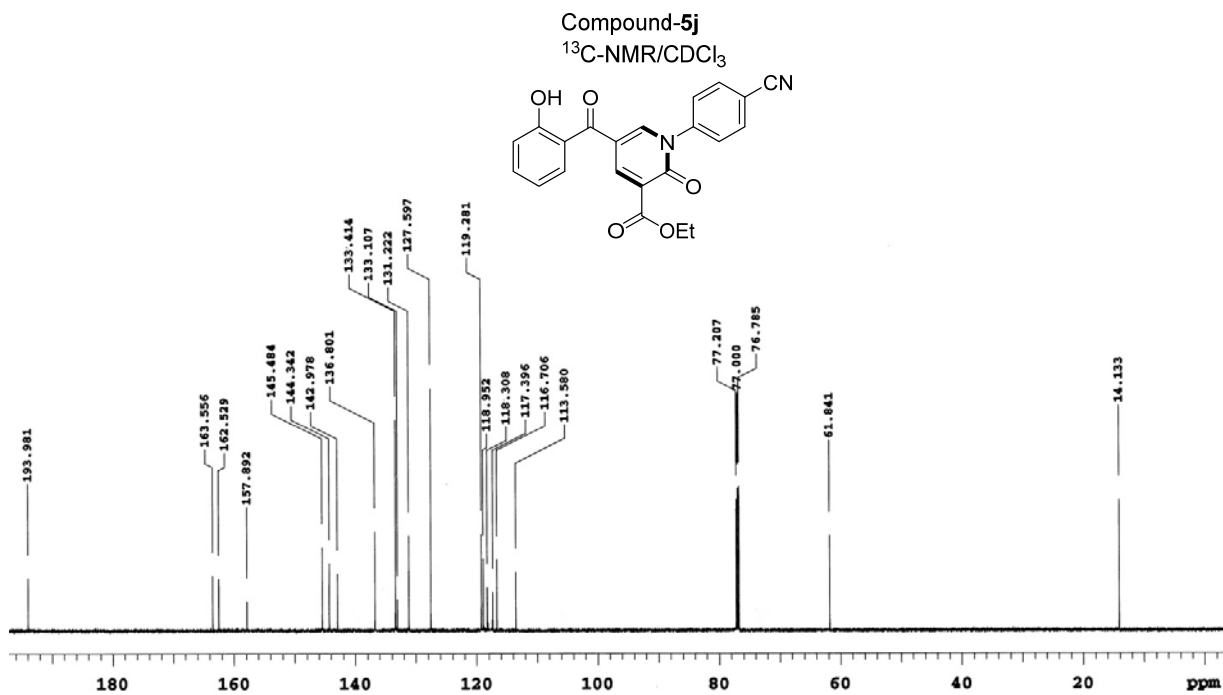

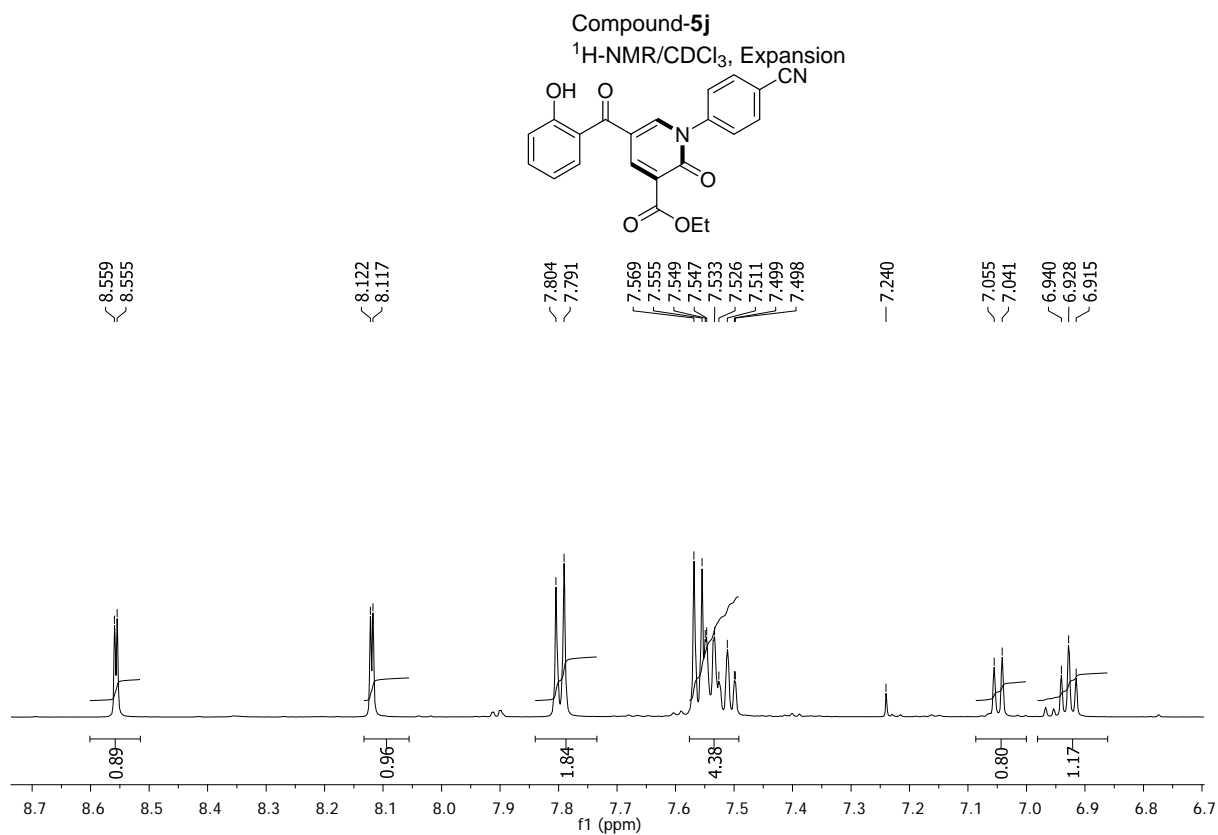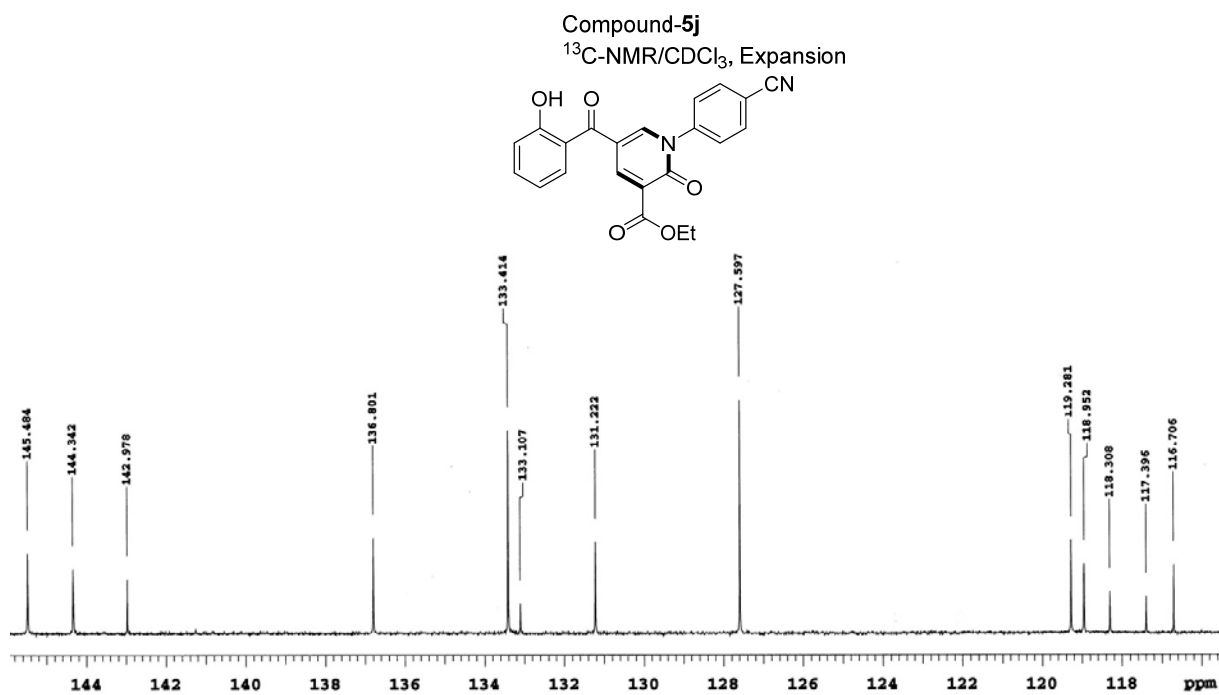

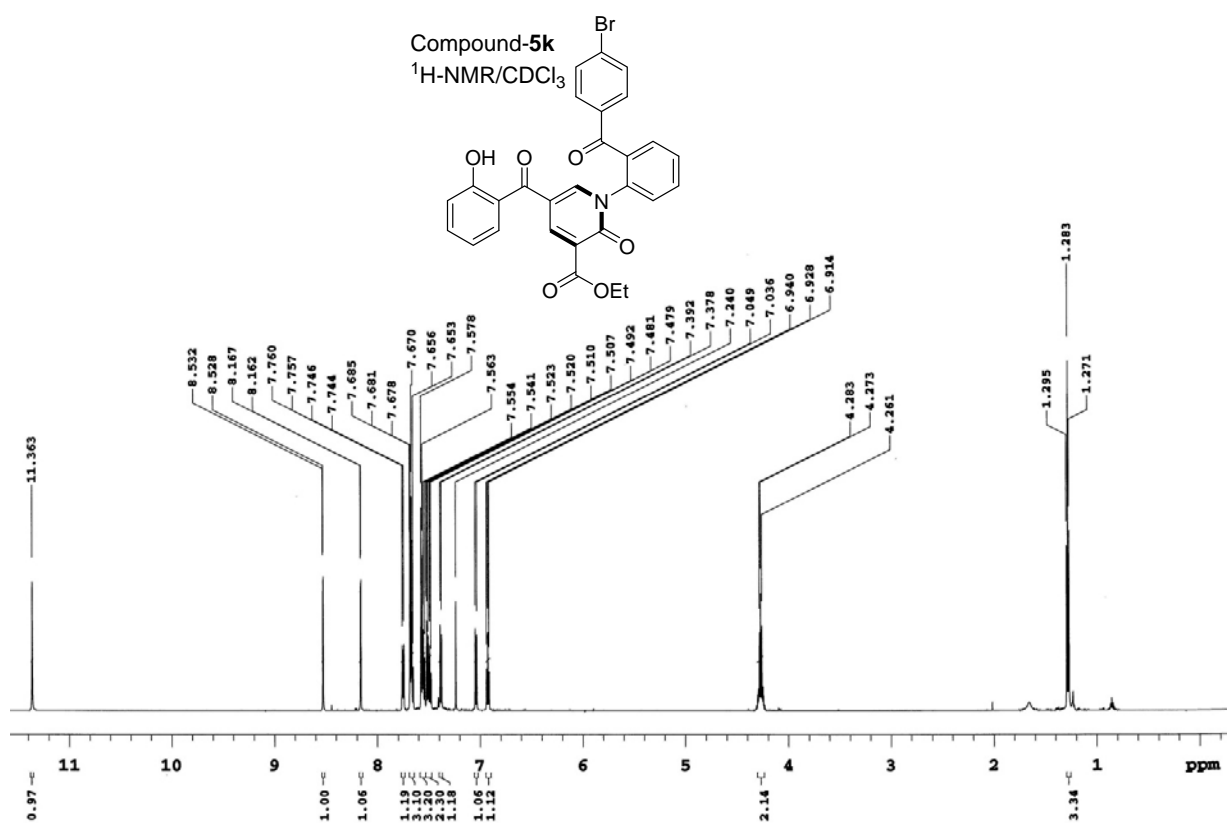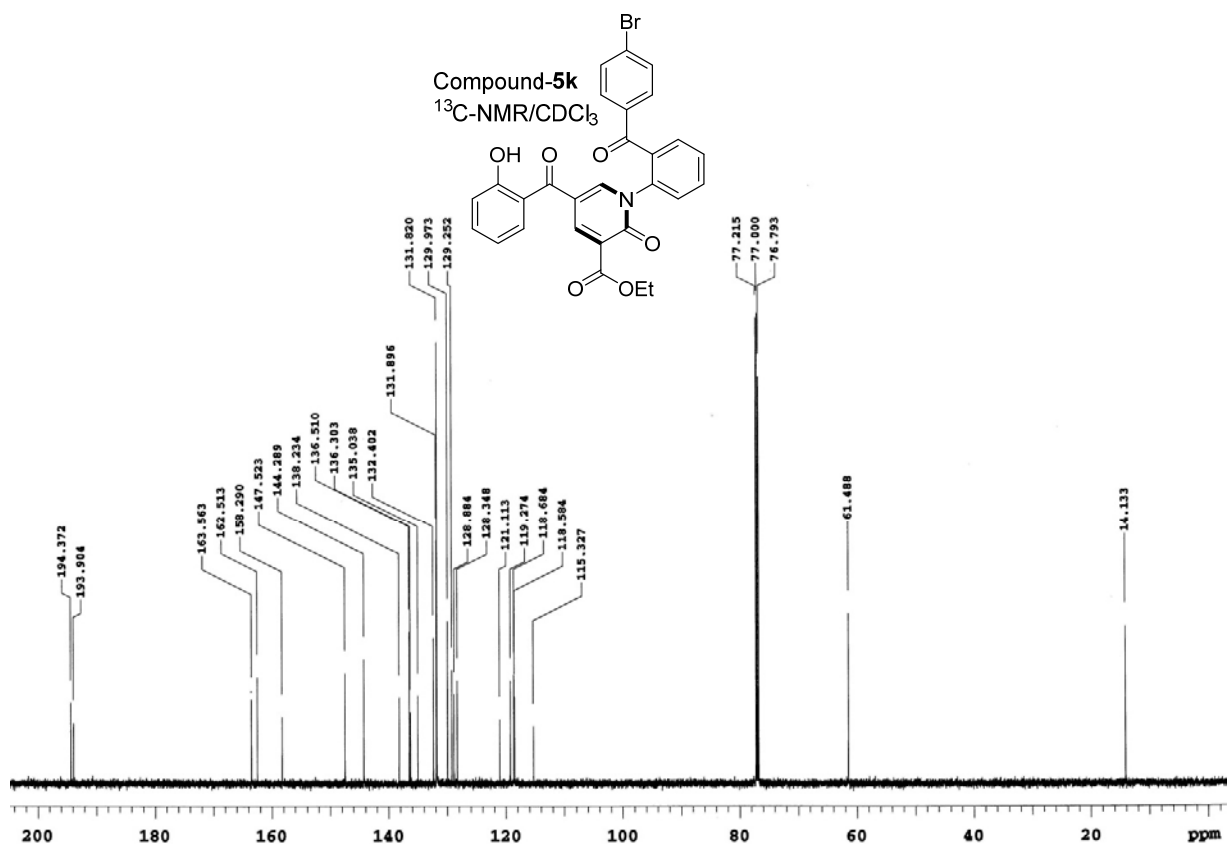

Compound-5k  
<sup>1</sup>H-NMR/CDCl<sub>3</sub>, Expansion

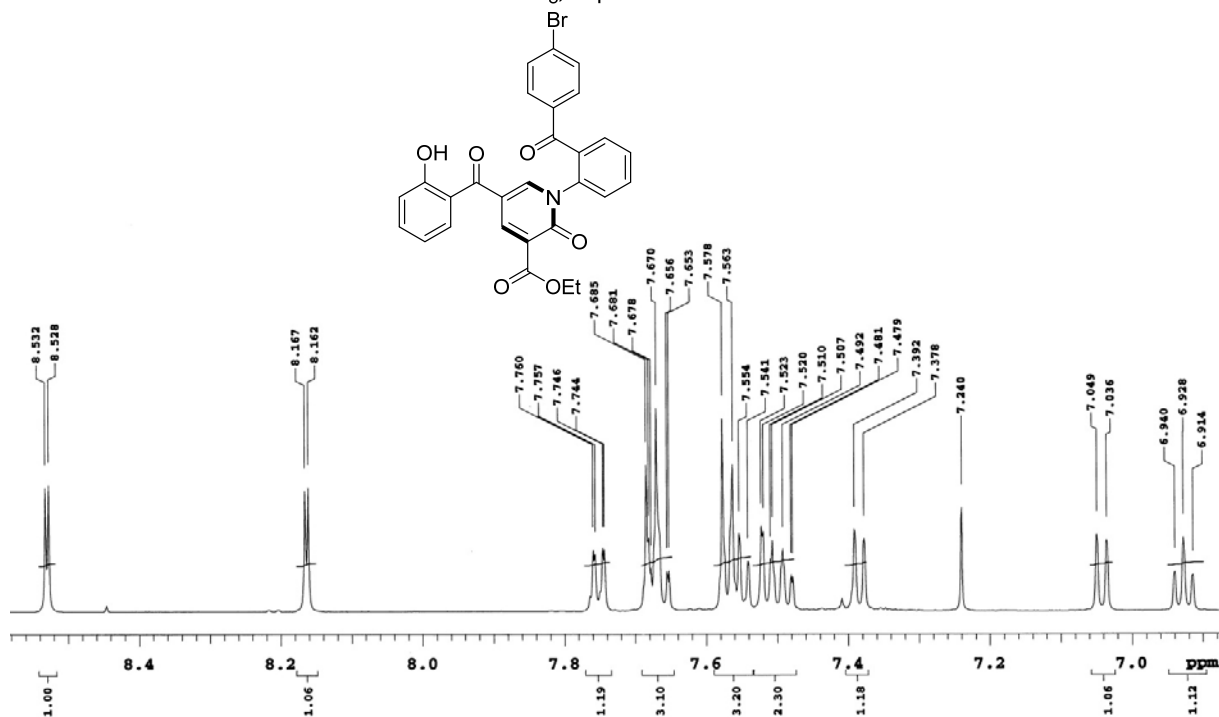

Compound-5k  
<sup>13</sup>C-NMR/CDCl<sub>3</sub>, Expansion

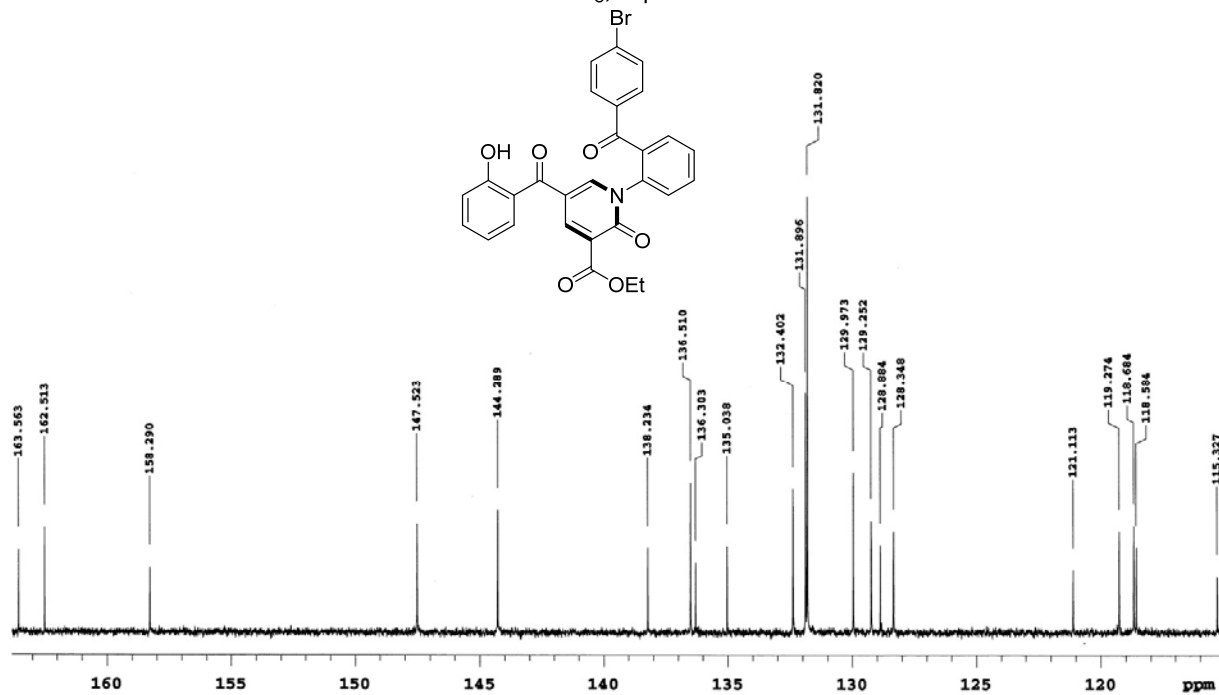

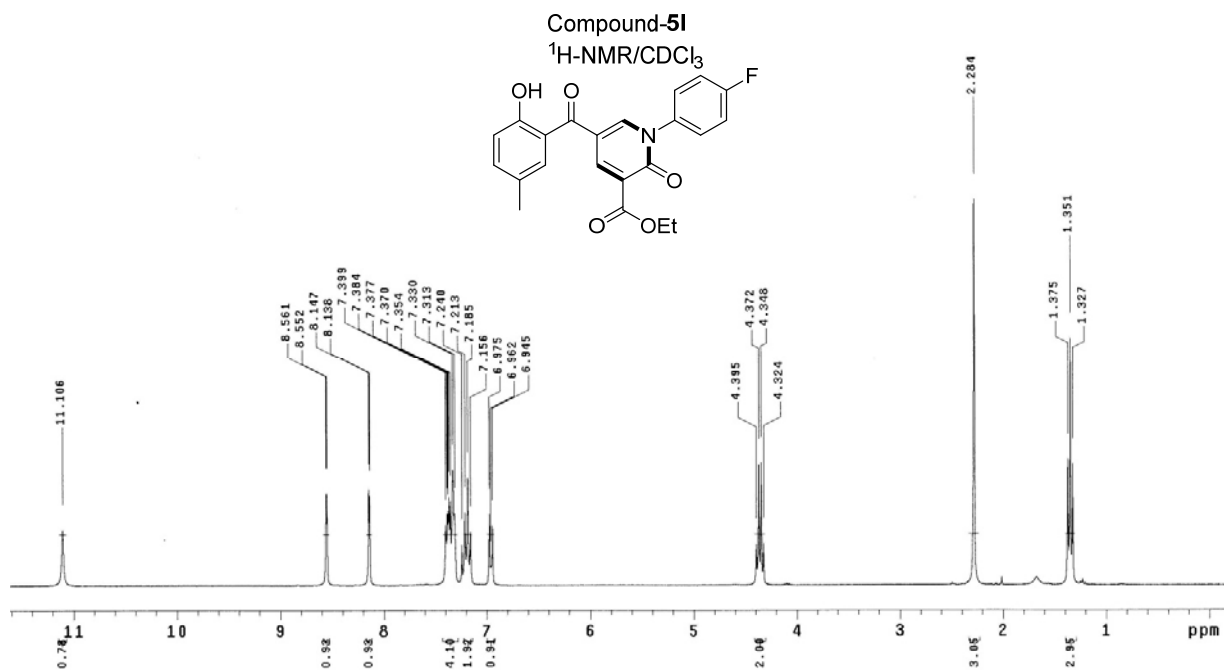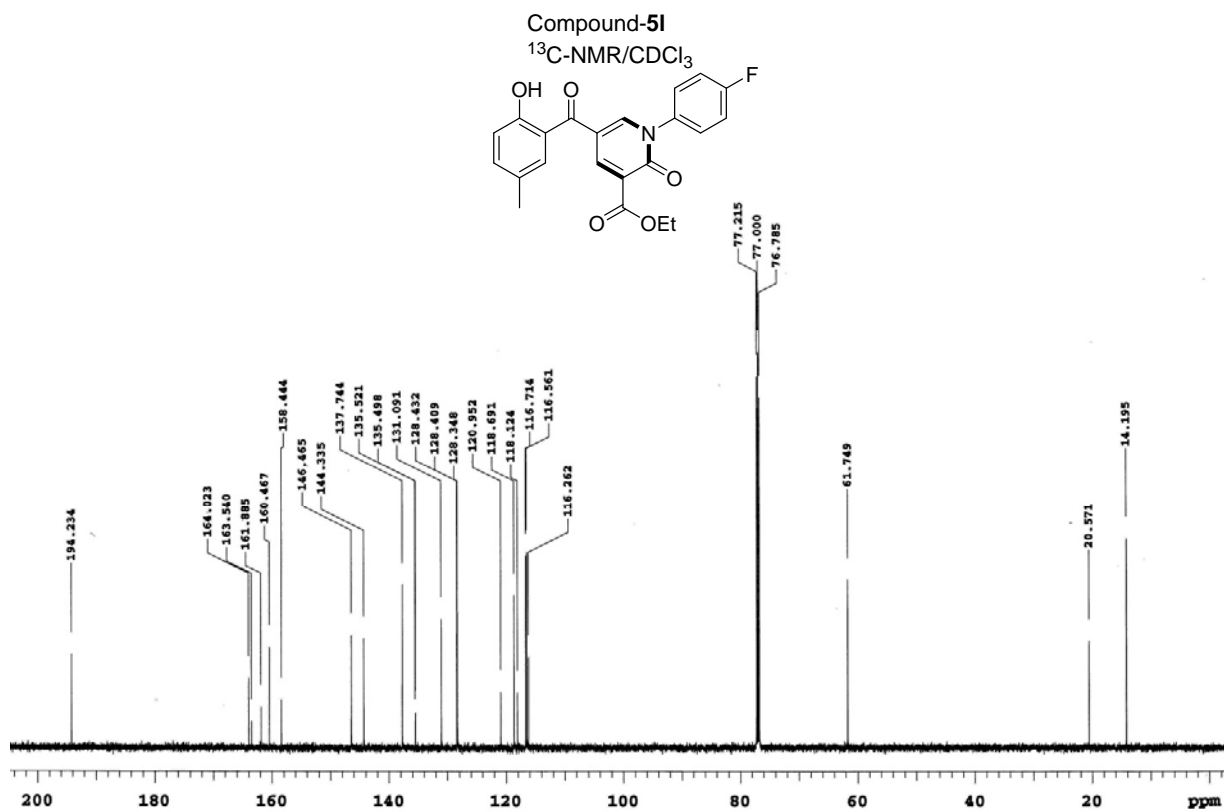

Compound-51

$^{13}\text{C}$ -NMR/ $\text{CDCl}_3$ , Expansion

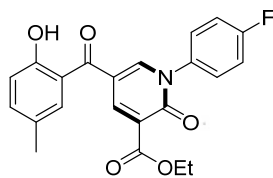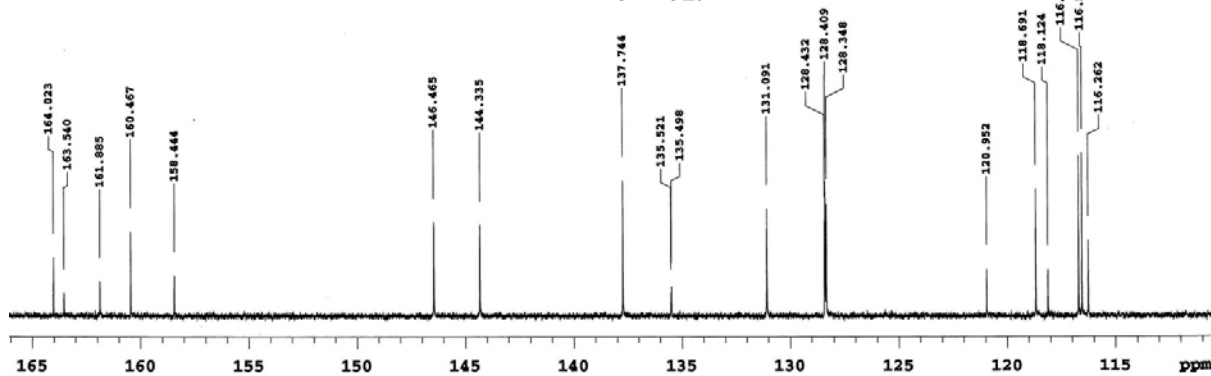

Compound-51

$^{19}\text{F}$ -NMR/ $\text{CDCl}_3$

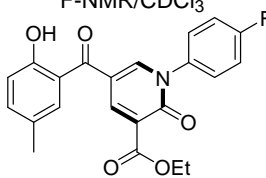

FidFile: FLOORINE

Pulse Sequence: FLOORINE (s2pul)

Solvent: cdcl3

Data collected on: May 26 2015

Temp. 25.0 C / 298.1 K

Operator: vmmr1

Relax. delay 1.000 sec

Pulse 30.0 degrees

Acq. time 0.996 sec

Width 131.6 kHz

16 repetitions

OBSERVE F19, 564.4292437 MHz

DATA PROCESSING

FT size 262144

Total time 0 min 32 sec

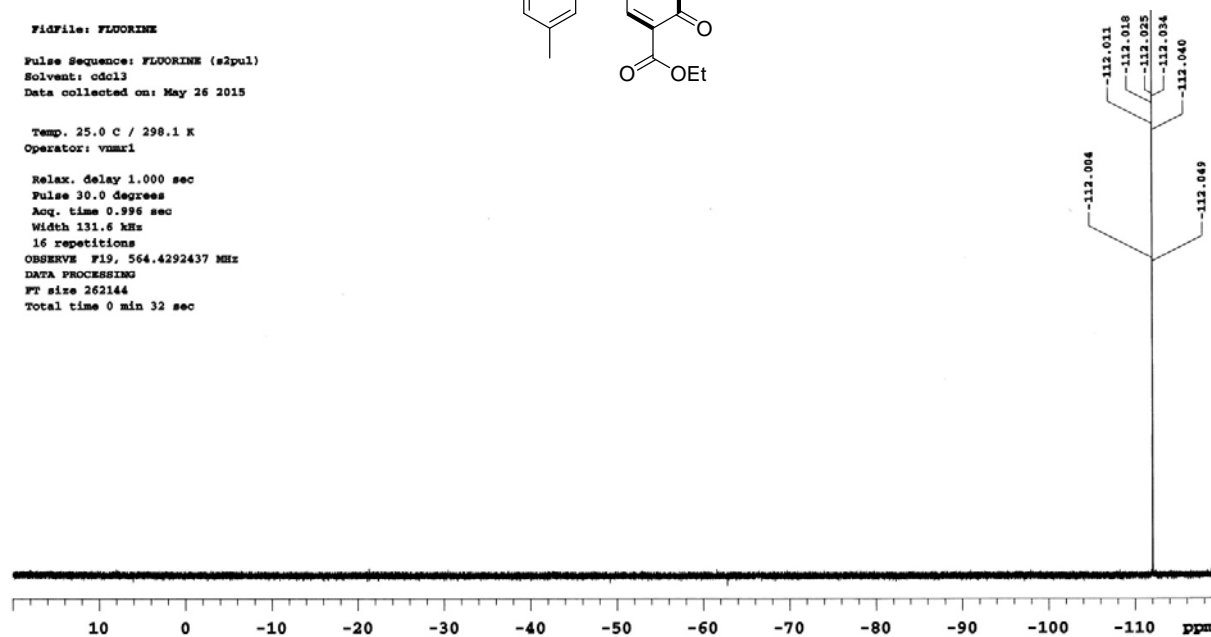

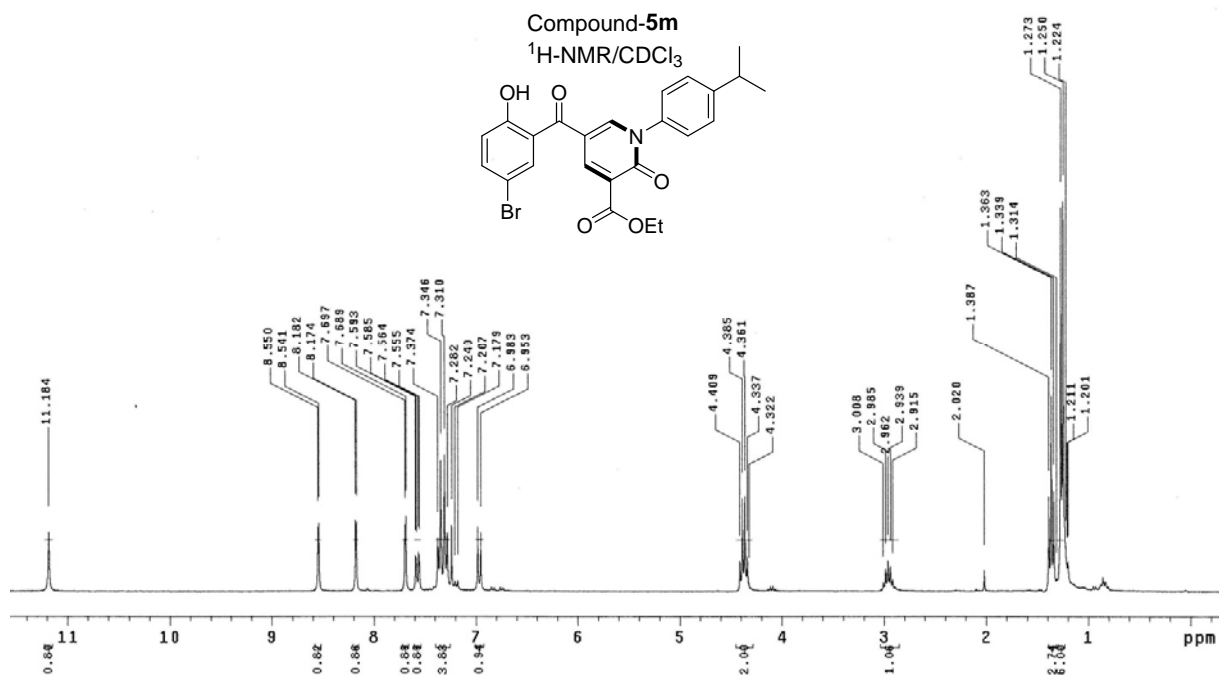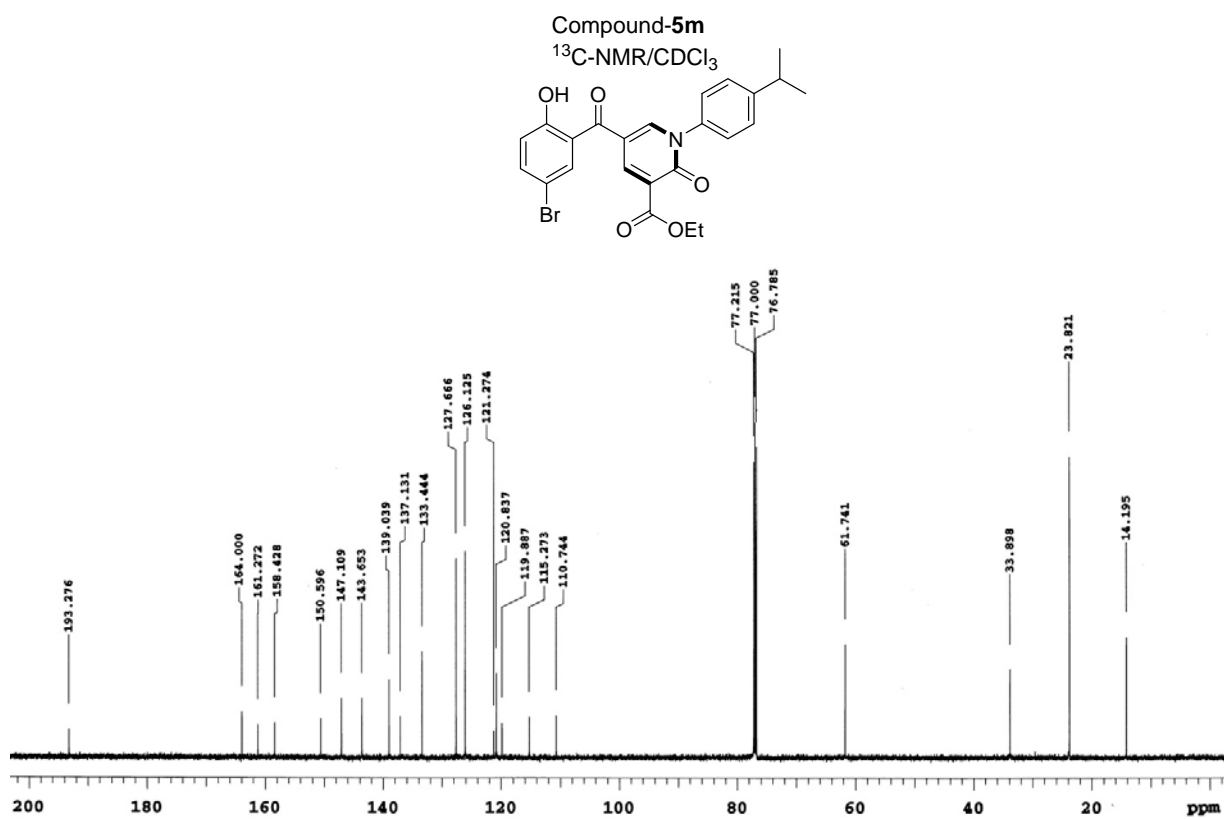

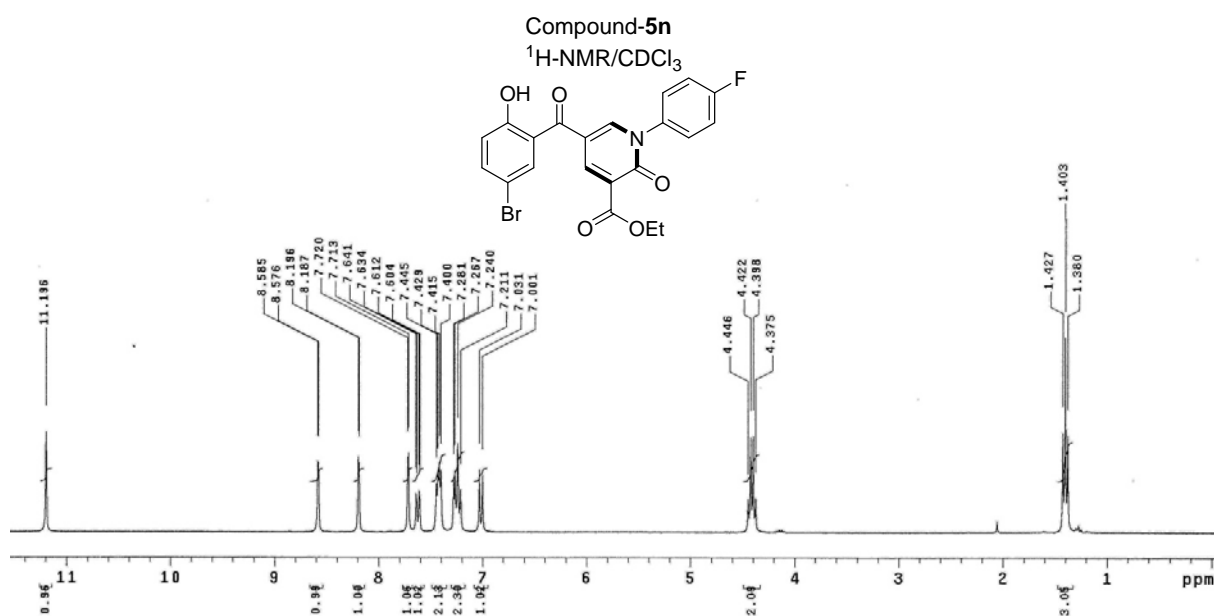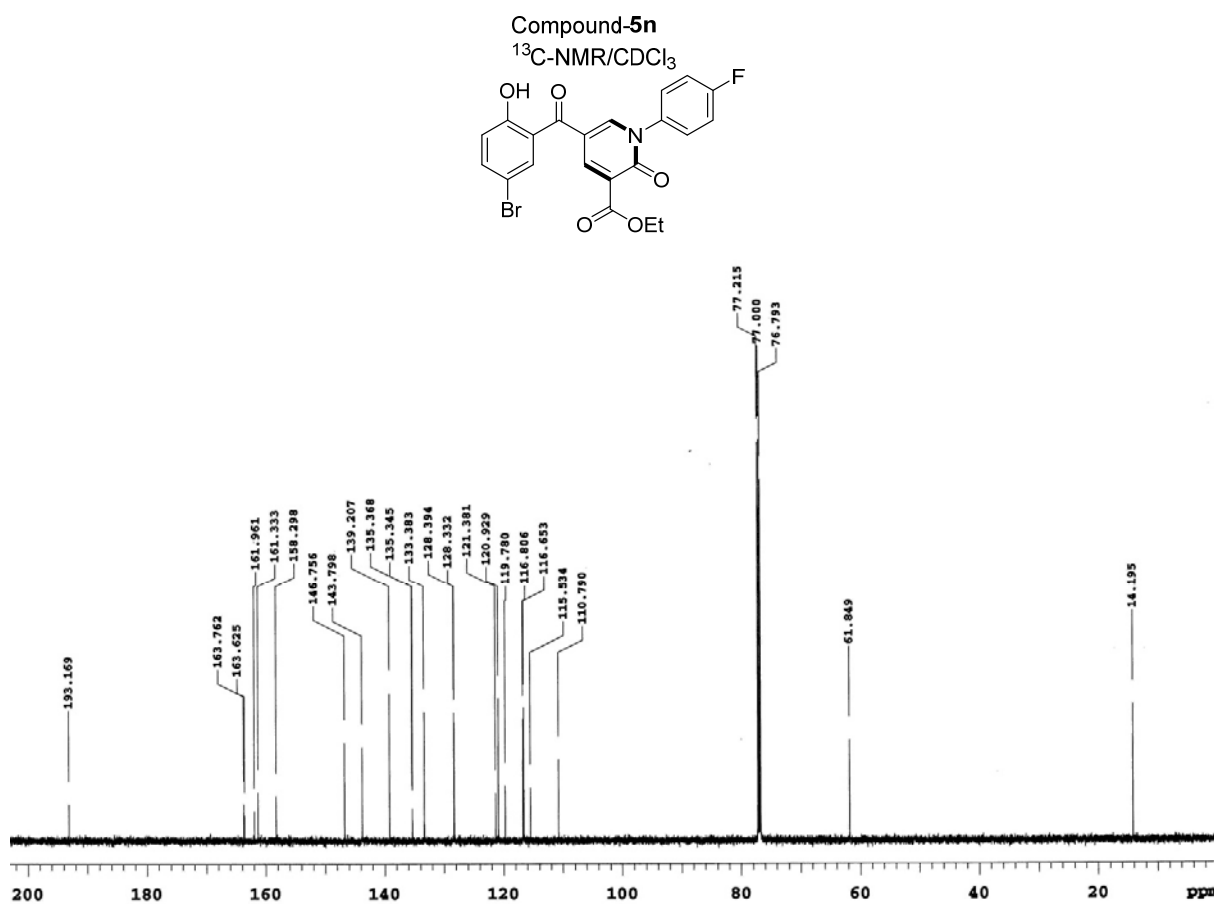

Compound-5n, Expansion  
<sup>13</sup>C-NMR/CDCl<sub>3</sub>

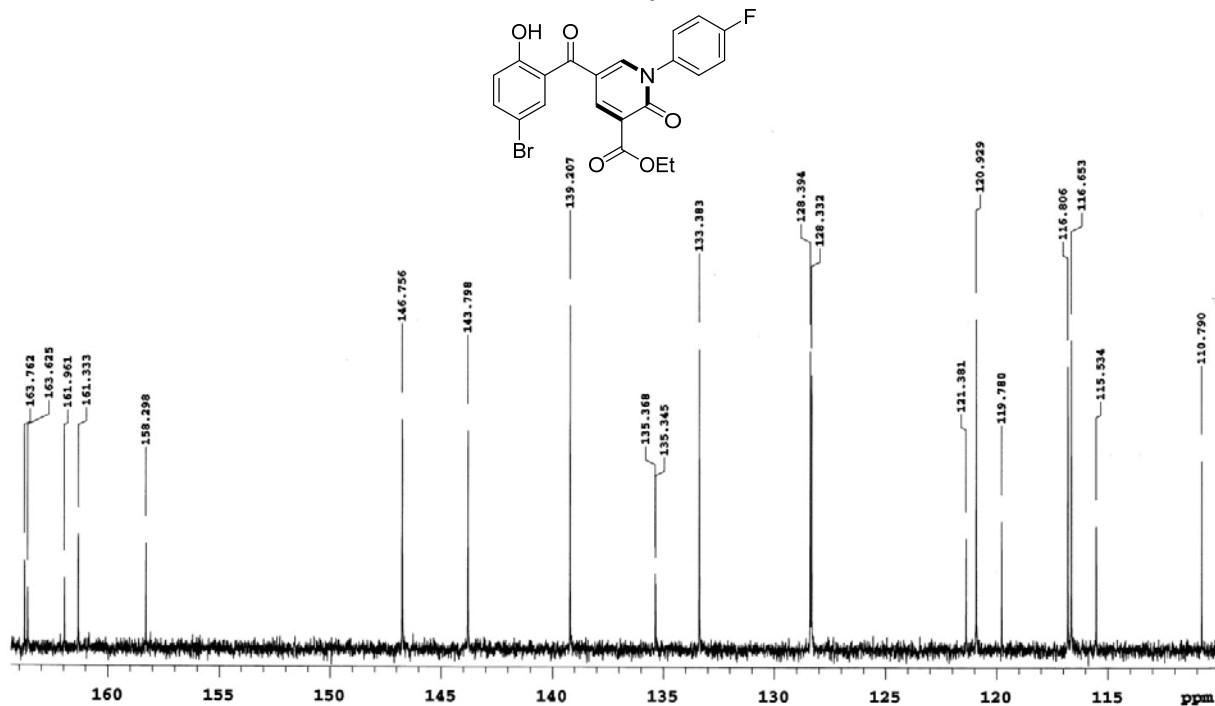

Compound-5n  
<sup>19</sup>F-NMR/CDCl<sub>3</sub>

Fidfile: FIDRINE  
Pulse Sequence: FIDRINE (s2pul)  
Solvent: cdcl3  
Data collected on: May 26 2015  
Temp. 25.0 C / 298.1 K  
Operator: vmmrl  
Relax. delay 1.000 sec  
Pulse 30.0 degrees  
Acq. time 0.996 sec  
Width 131.6 kHz  
16 repetitions  
OBSERVE F19, 564.4292363 MHz  
DATA PROCESSING  
FT size 262144  
Total time 0 min 32 sec

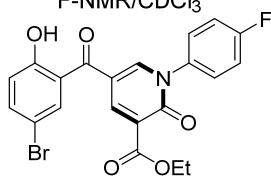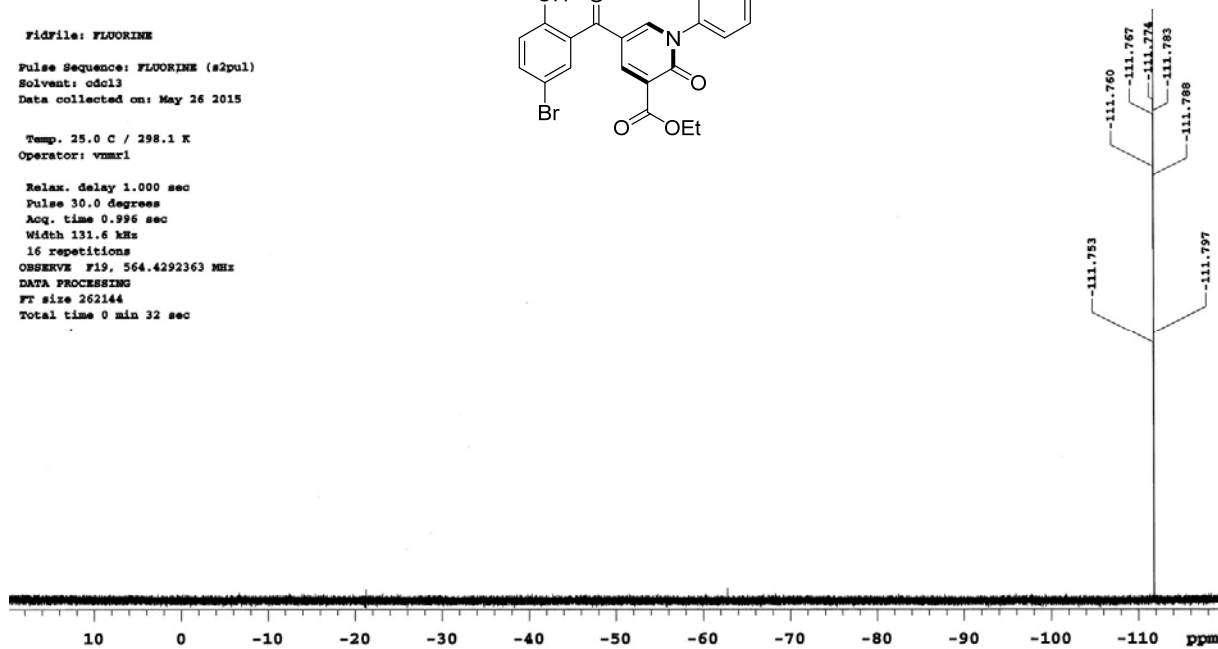

Compound-6a  
<sup>1</sup>H-NMR/CDCl<sub>3</sub>

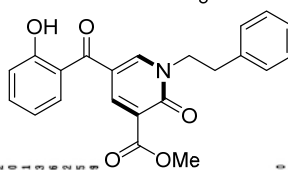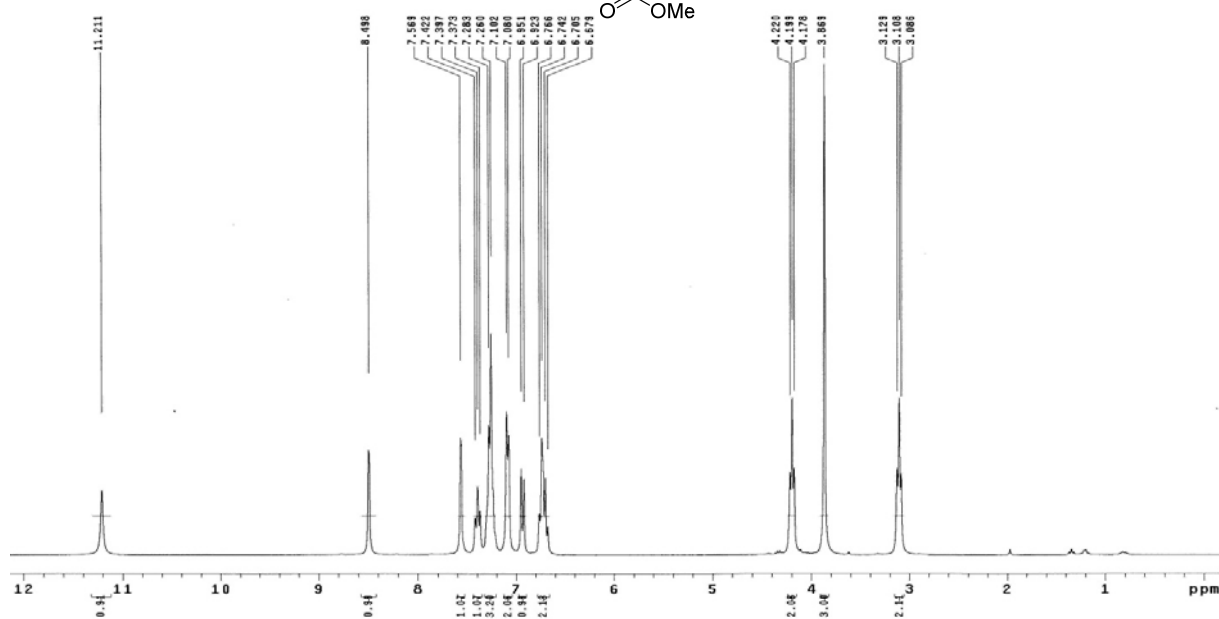

Compound-6a  
<sup>13</sup>C-NMR/CDCl<sub>3</sub>

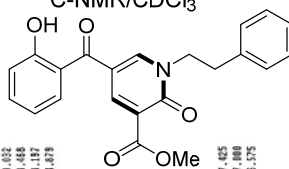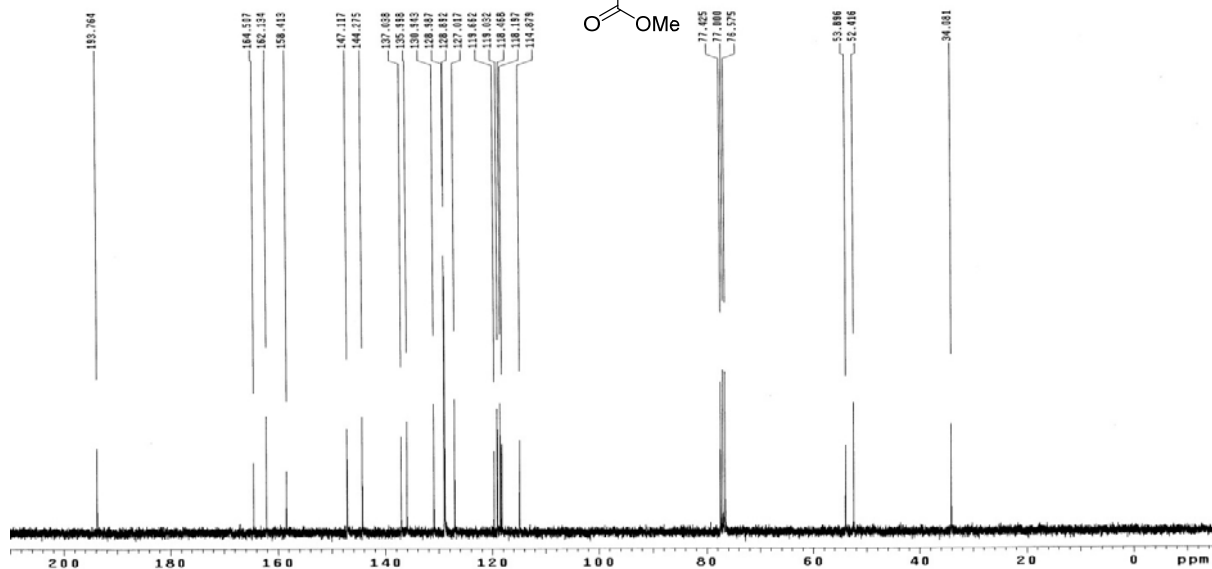

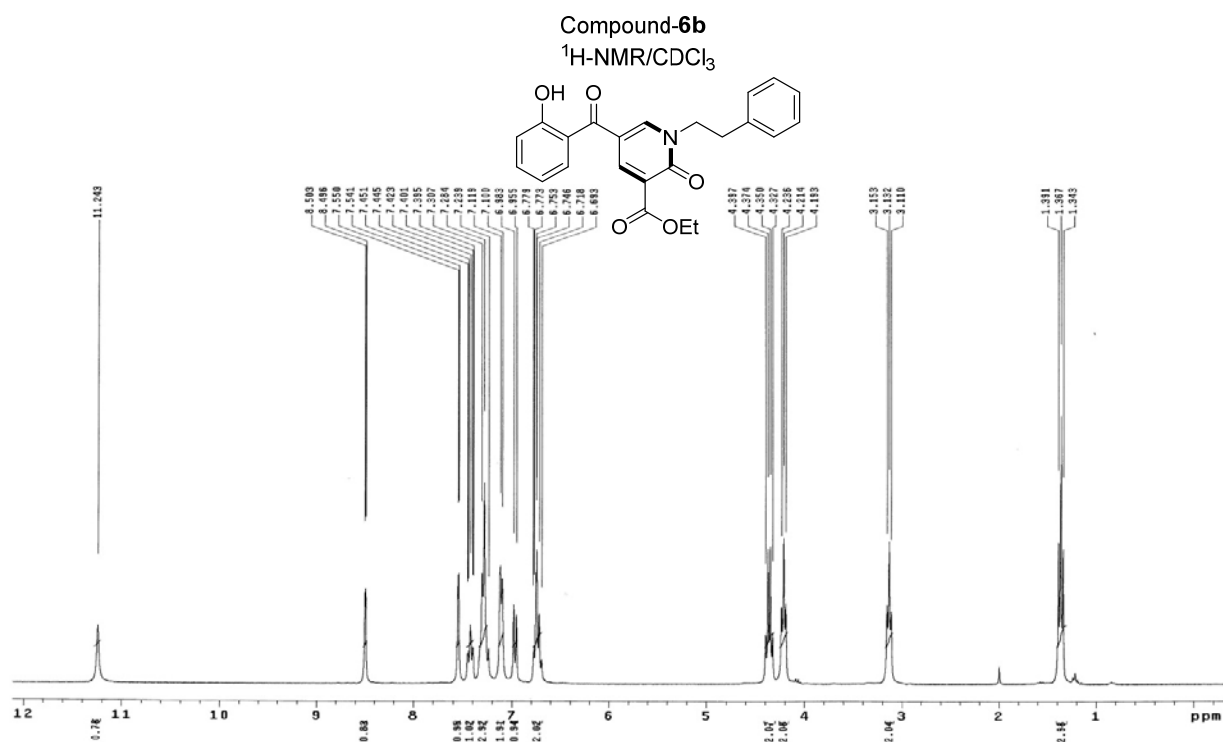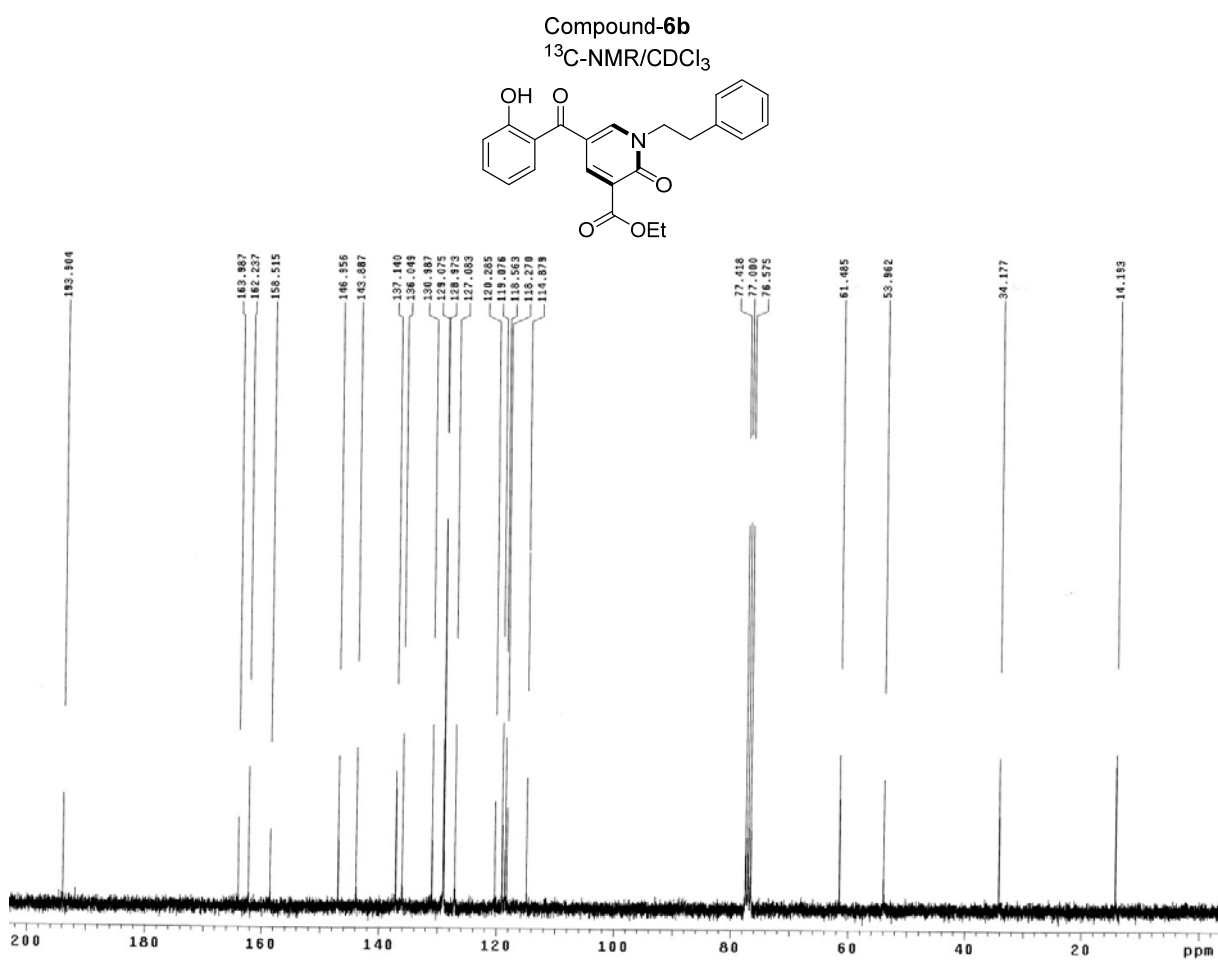

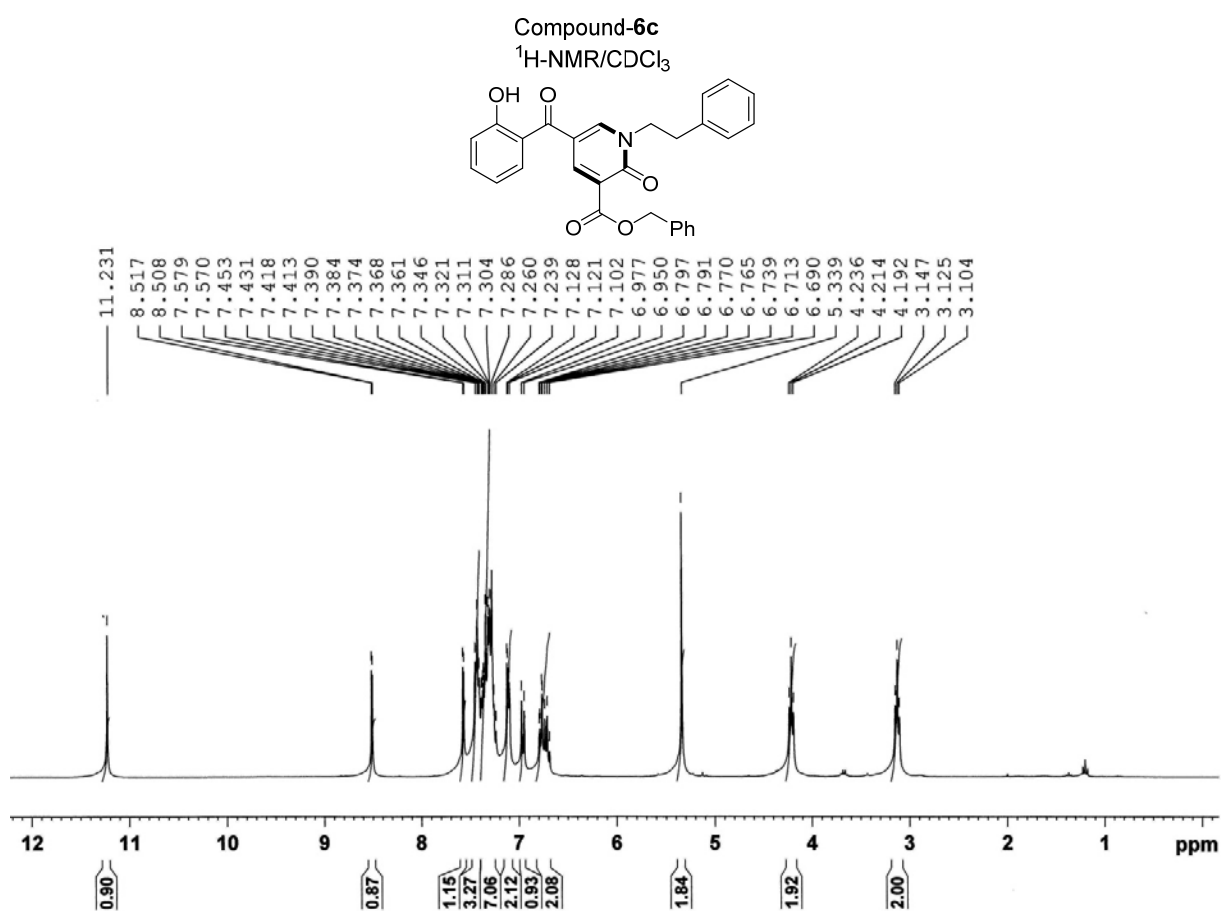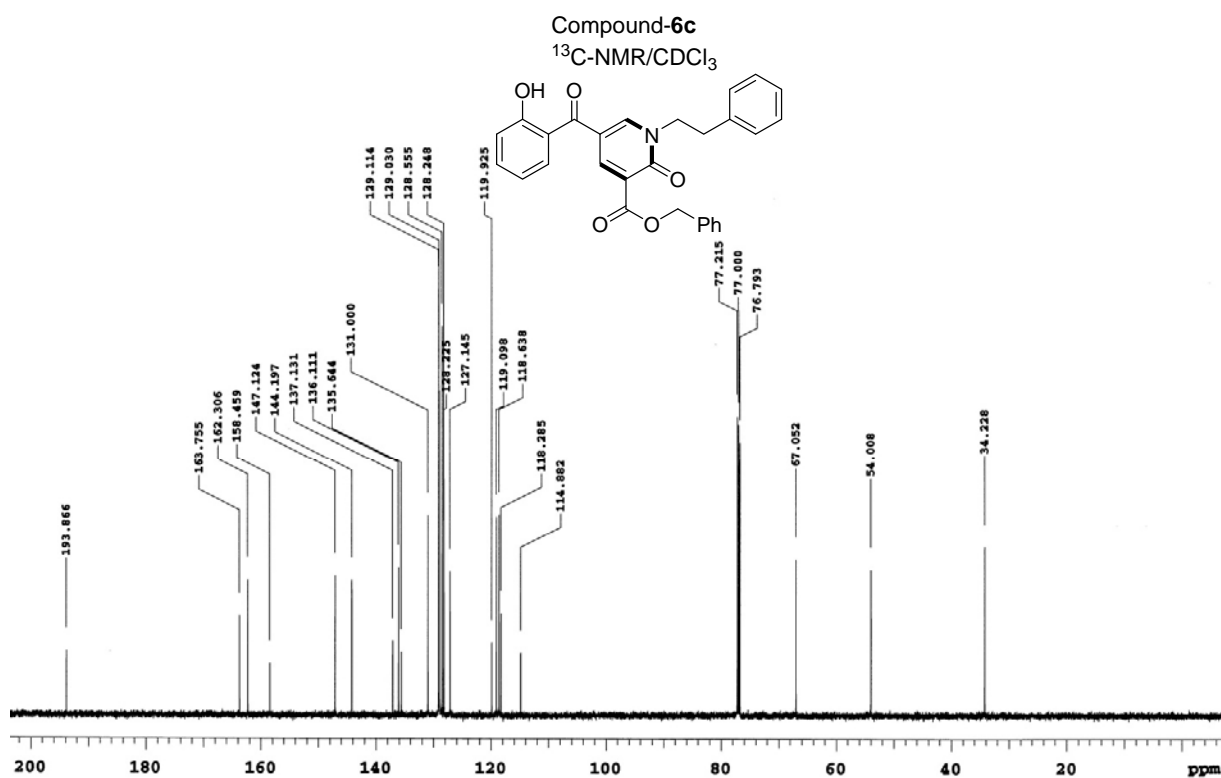

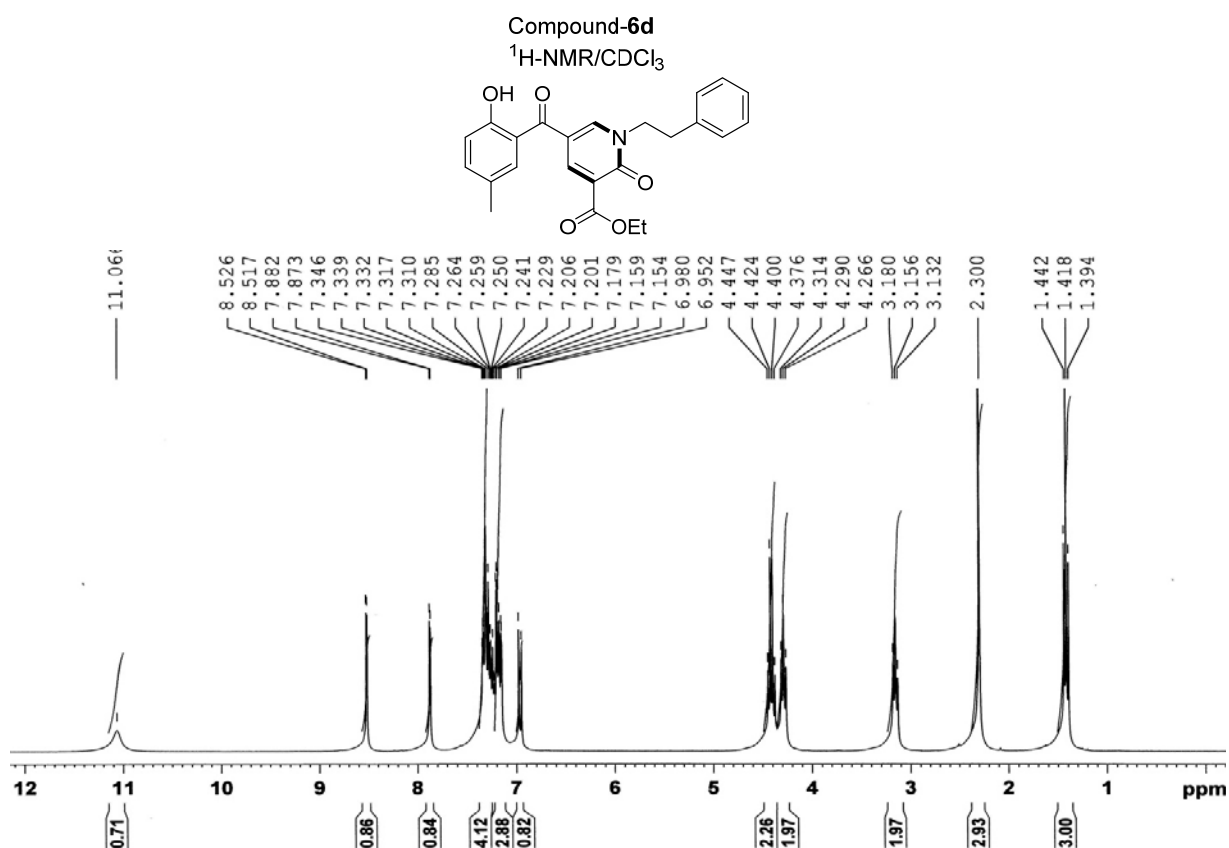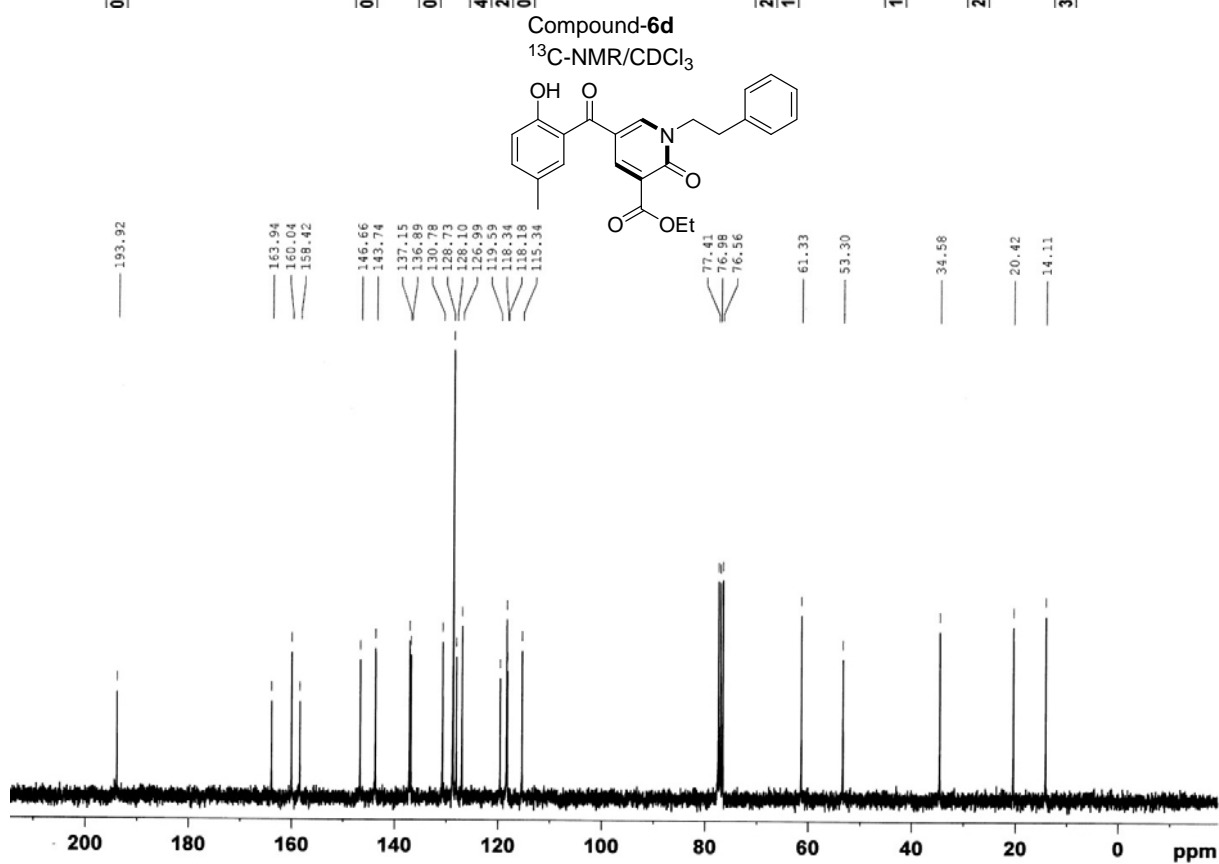

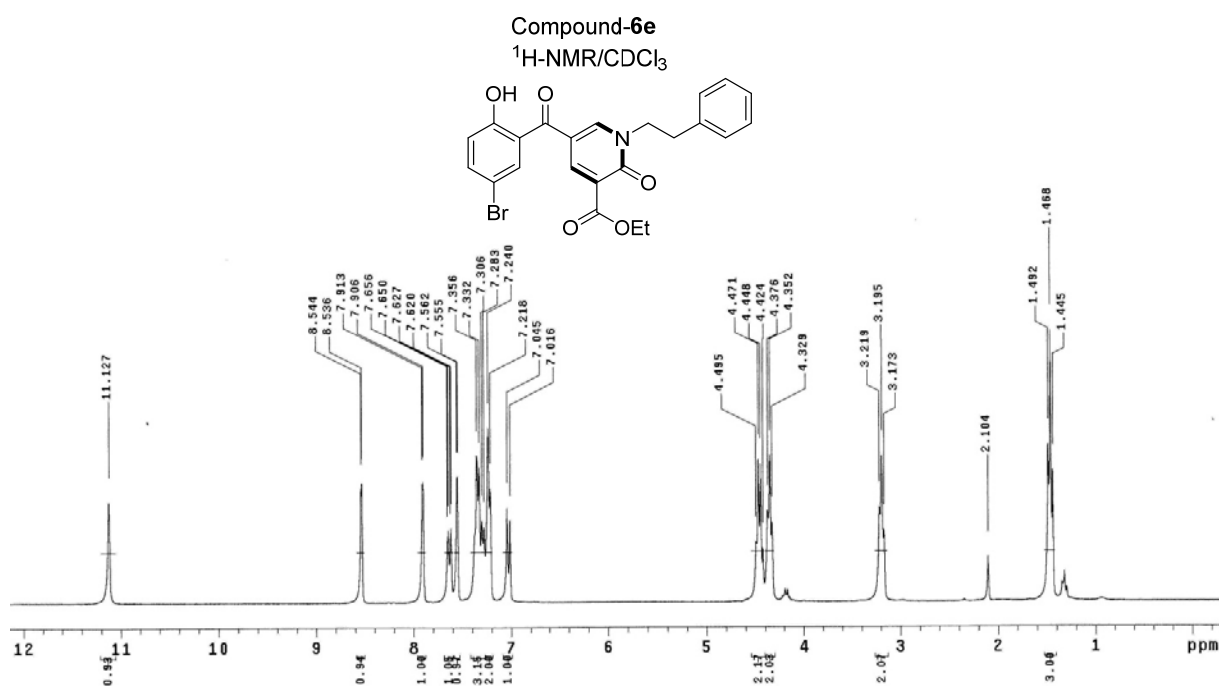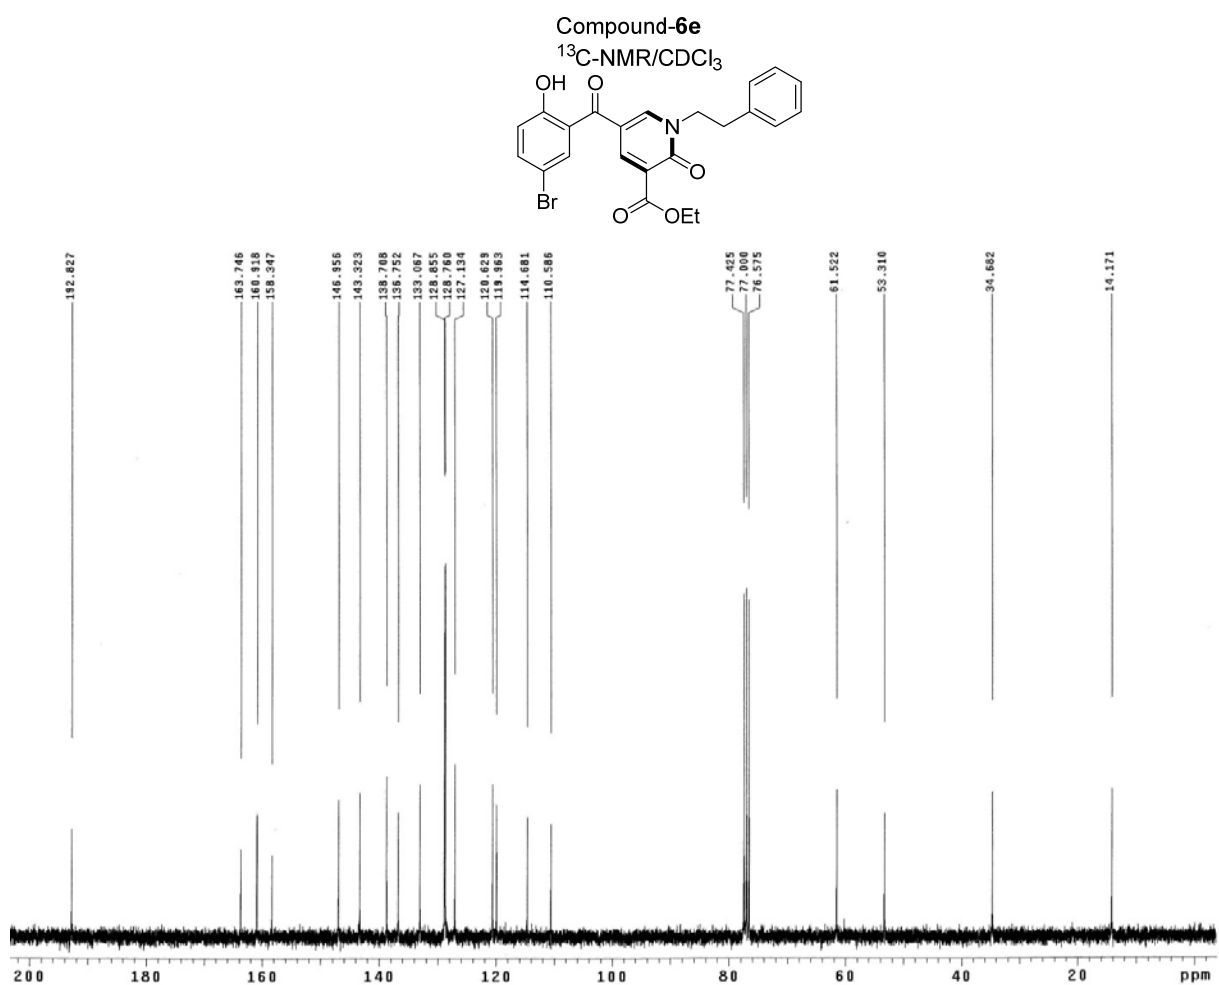

Compound-6f

$^1\text{H-NMR}/\text{CDCl}_3 + \text{DMSO}-d_6$

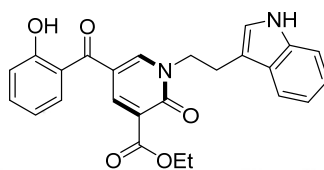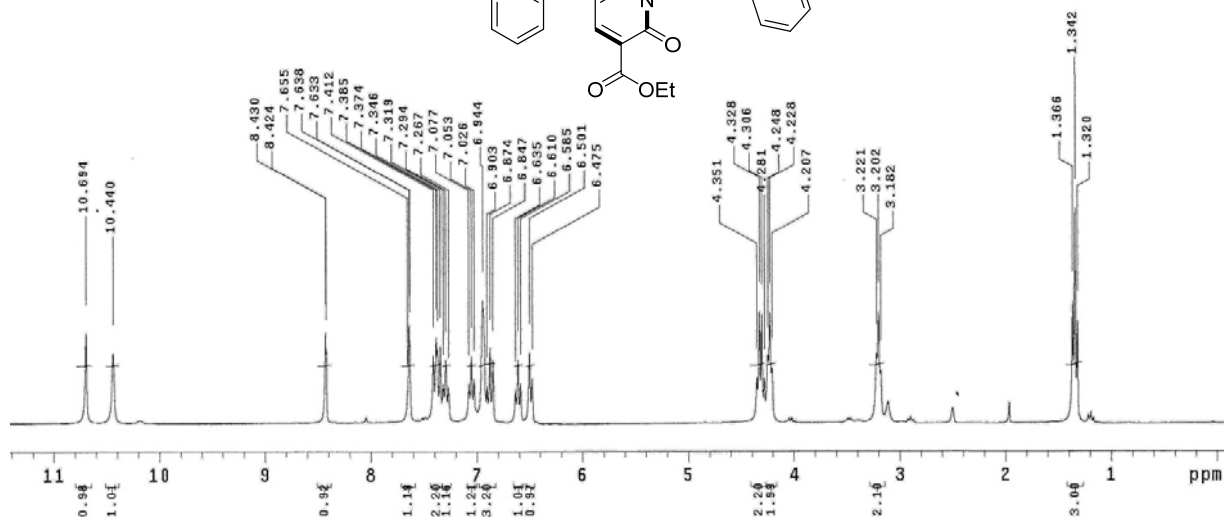

Compound-6f

$^{13}\text{C-NMR}/\text{CDCl}_3 + \text{DMSO}-d_6$

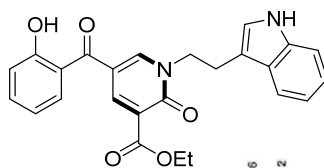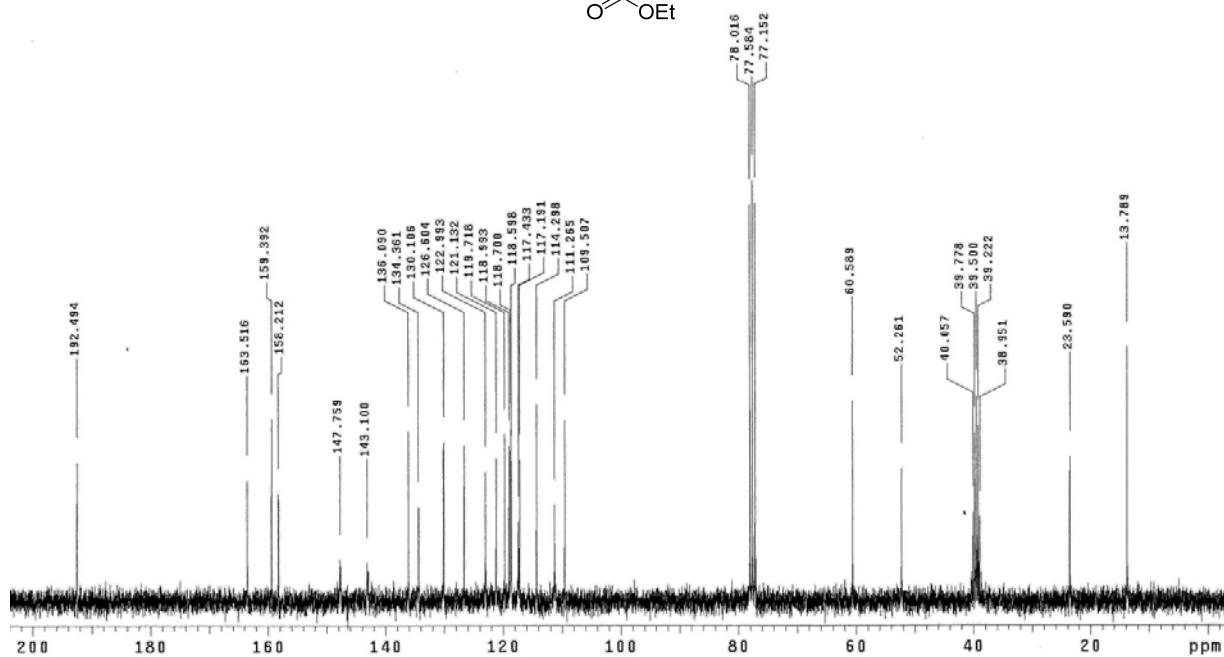

Compound-6f

$^1\text{H-NMR}/\text{CDCl}_3 + \text{DMSO-}d_6$ , Expansion

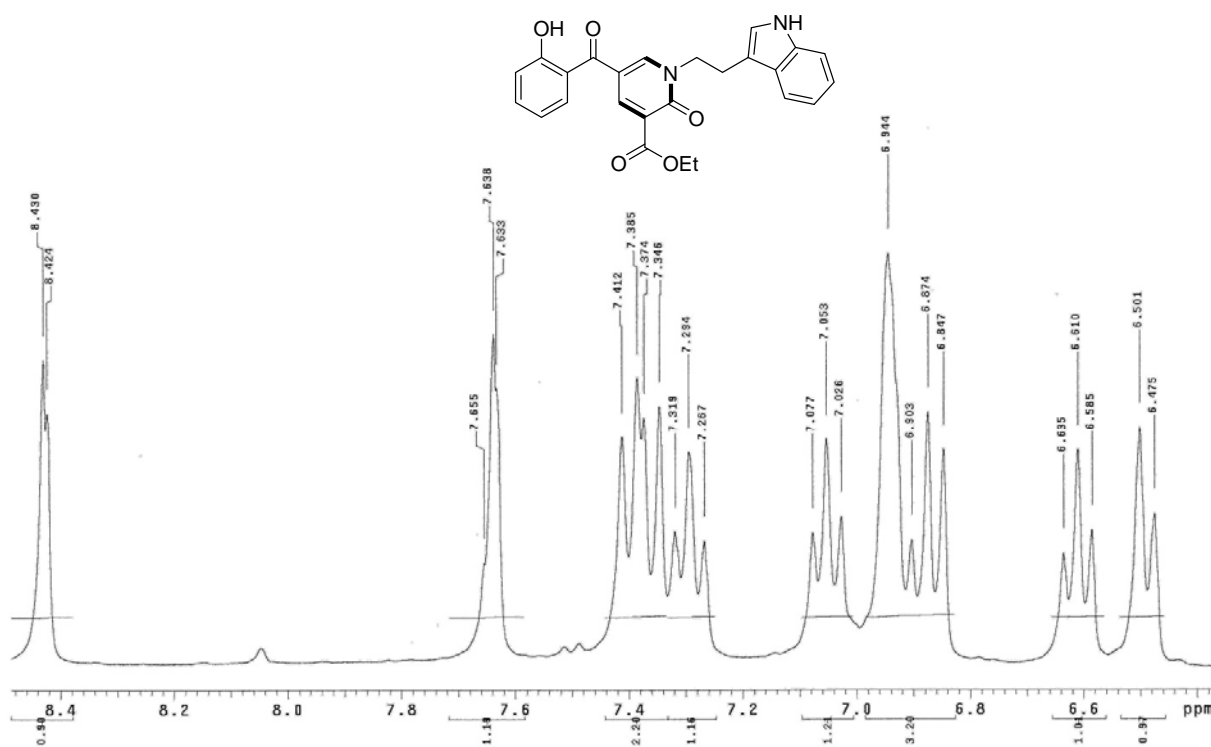

Compound-6f

$^{13}\text{C-NMR}/\text{CDCl}_3 + \text{DMSO-}d_6$ , Expansion

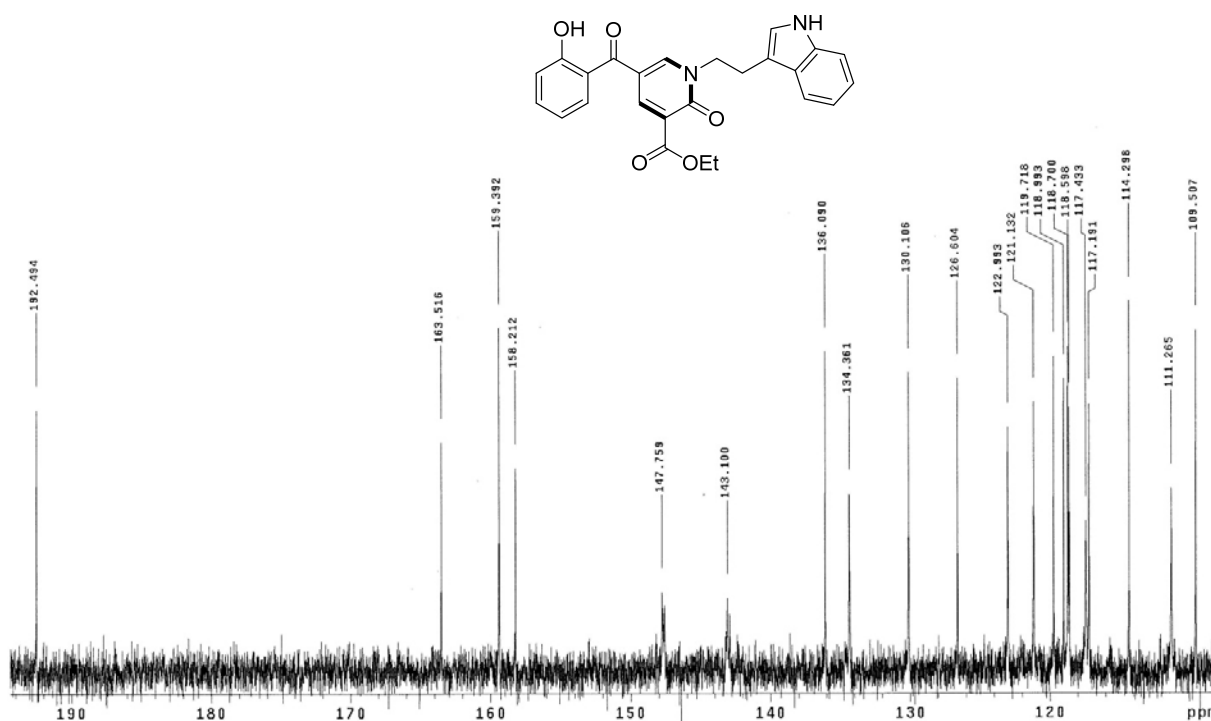

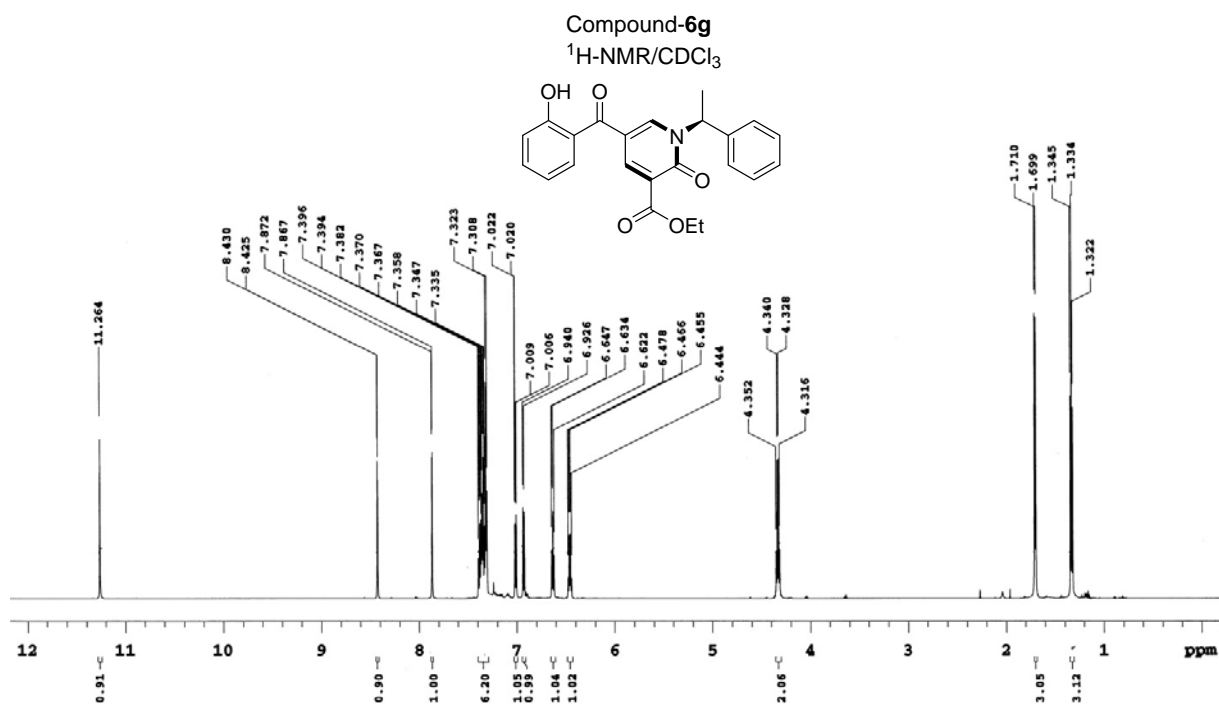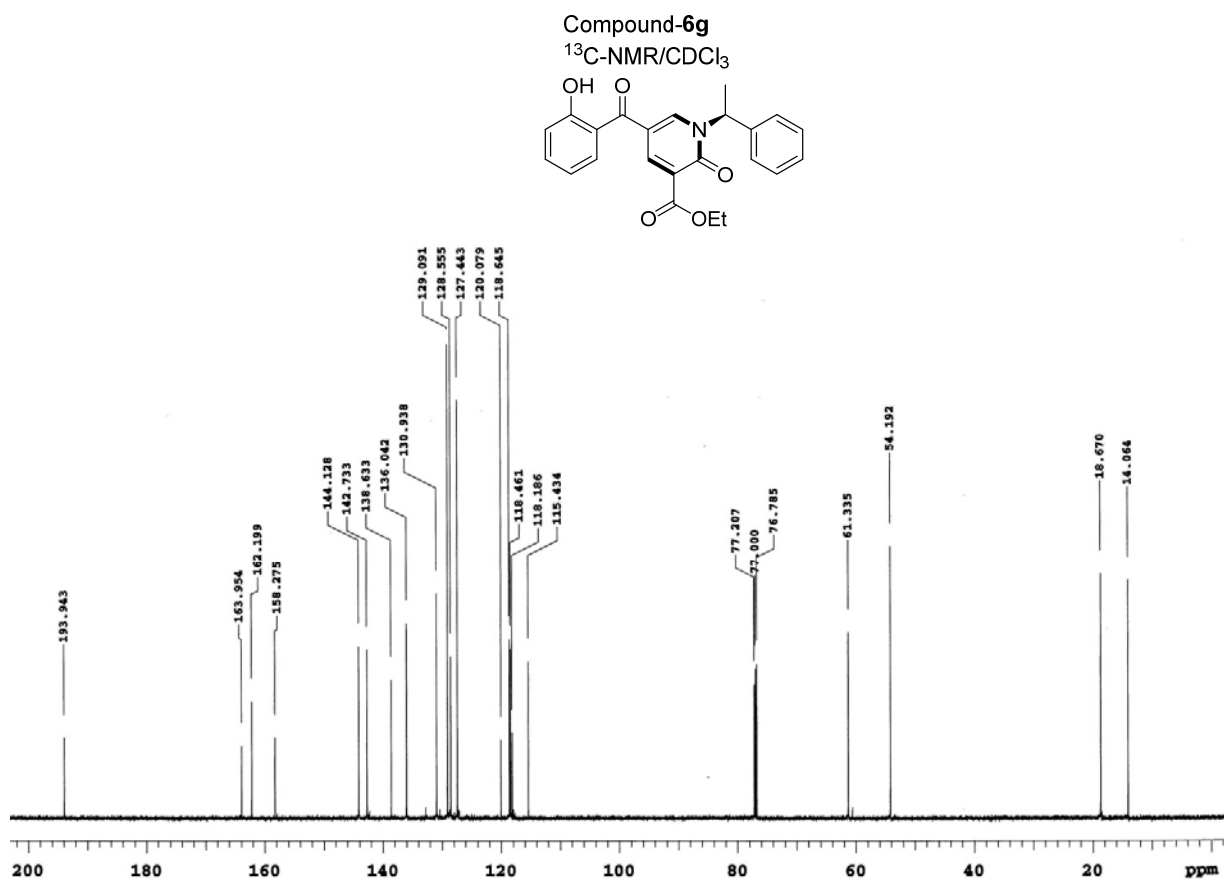

Compound-6g  
<sup>1</sup>H-NMR/CDCl<sub>3</sub>, Expansion

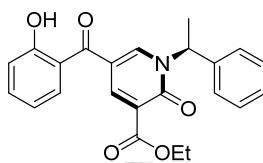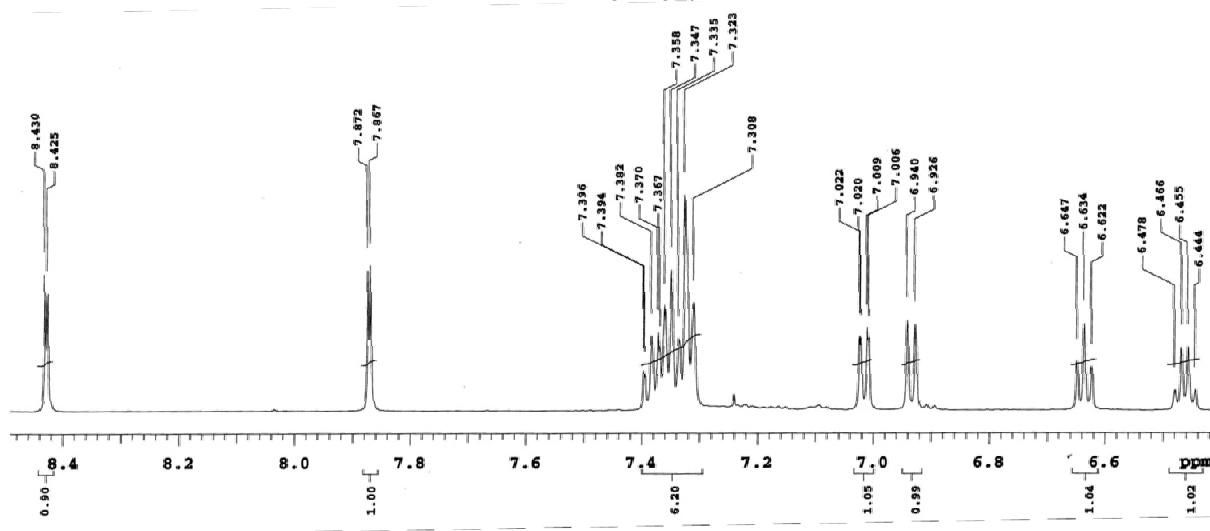

Compound-6g  
<sup>13</sup>C-NMR/CDCl<sub>3</sub>, Expansion

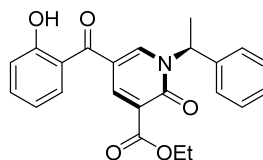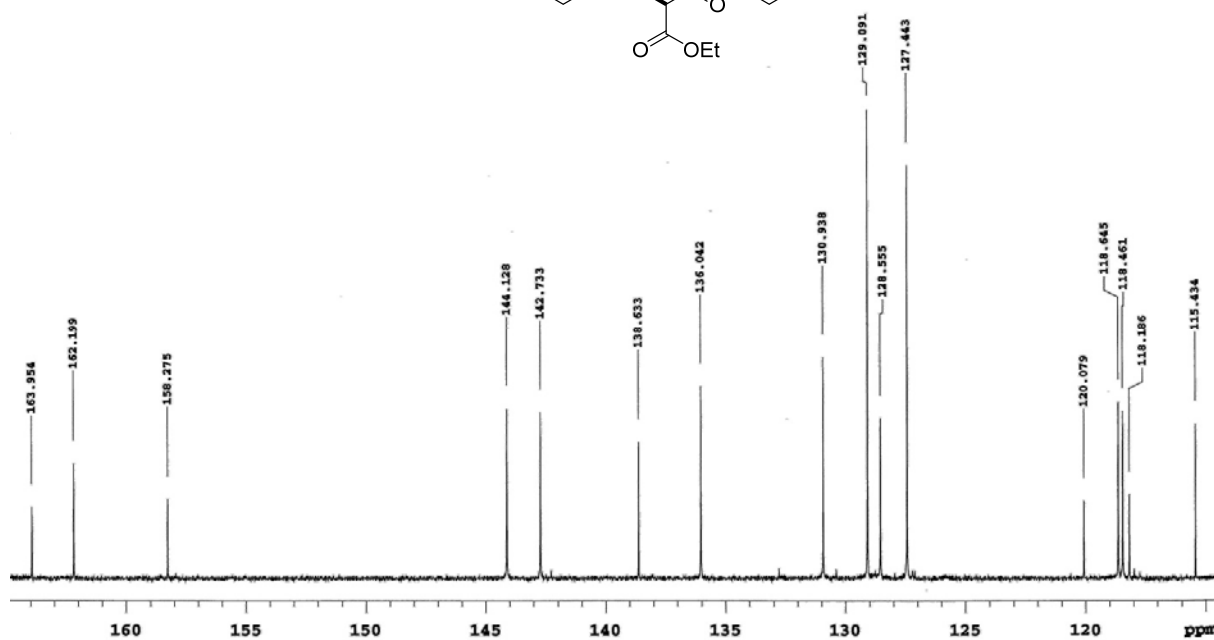

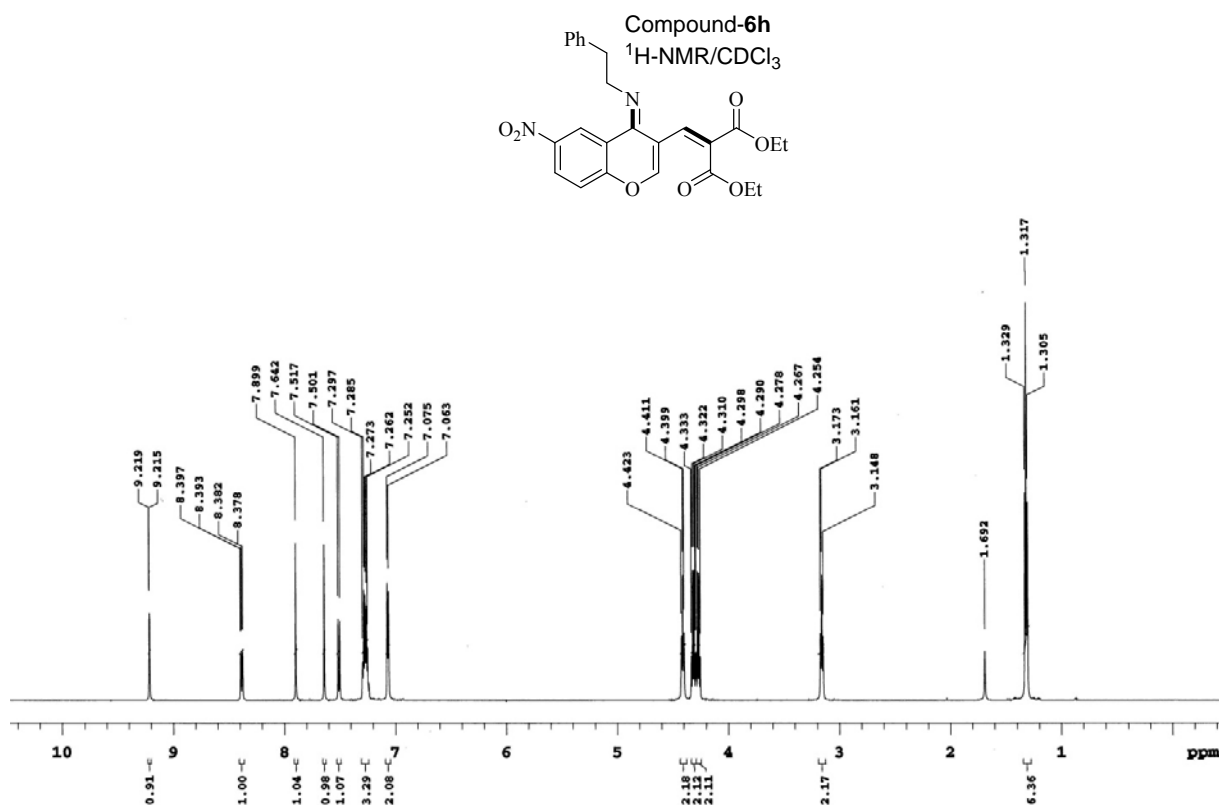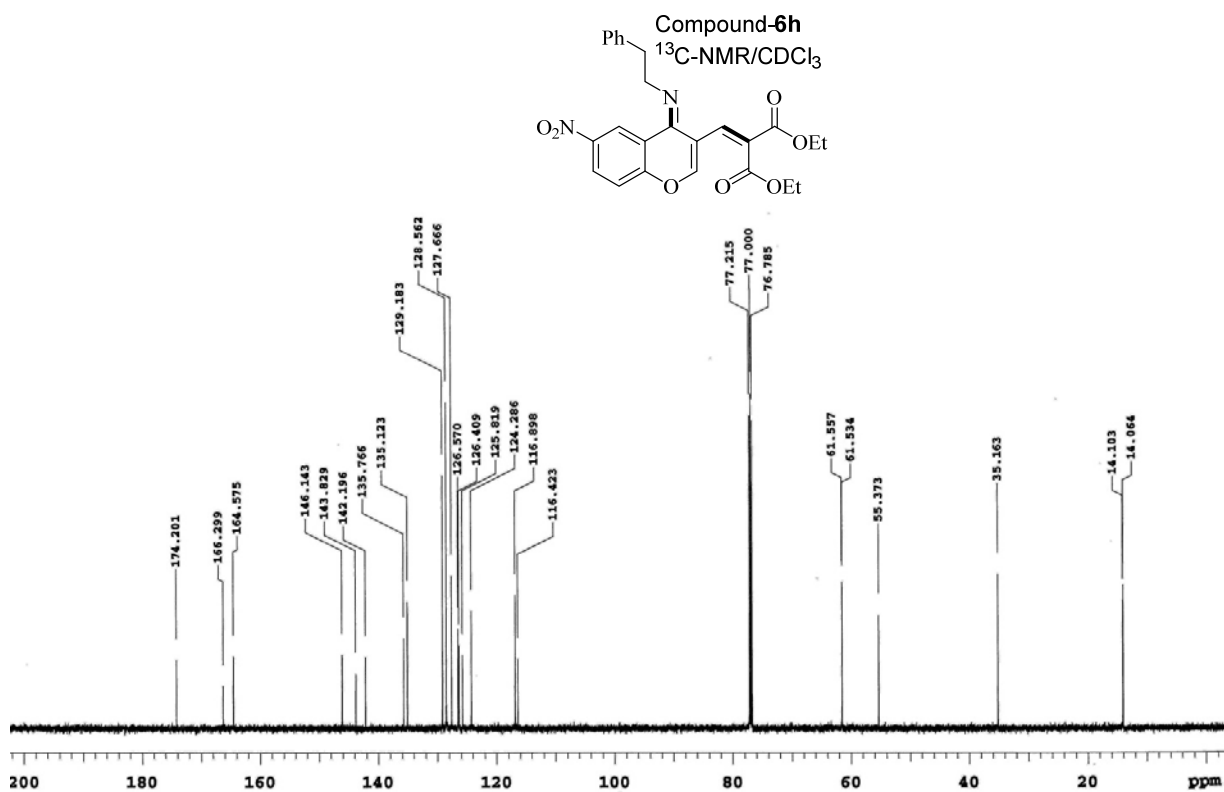

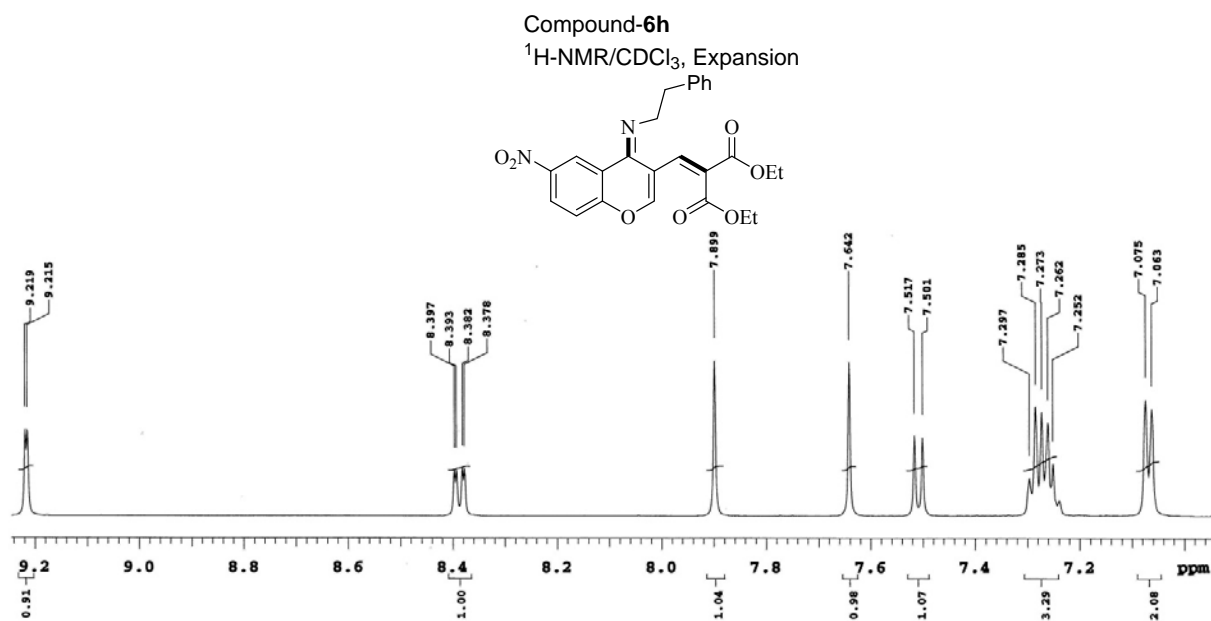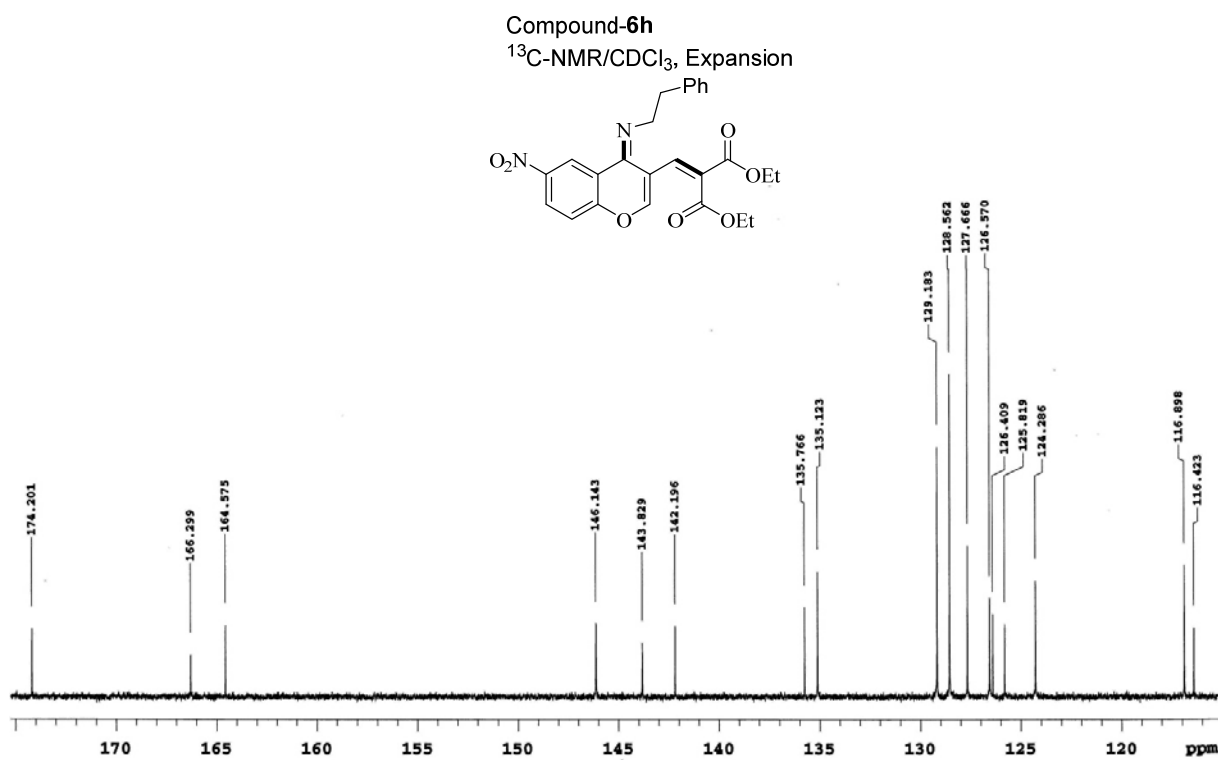

Supplement: c5gc01526j1.pdf [file c5gc01526j1.pdf]
